1 **Retrospective analysis of *The Two Sister Study* using haplotype-based association testing to**  
2 **identify loci associated with early-onset breast cancer**

3 James R. Gilbert, Ph.D.<sup>1</sup>, James J. Cray, Ph.D.<sup>2</sup>, Joseph E. Losee, M.D.<sup>1</sup>, Gregory M. Cooper,  
4 Ph.D.<sup>1,3,4</sup>.

- 5
- 6 1. Department of Plastic Surgery, University of Pittsburgh/Children's Hospital of Pittsburgh,
  - 7 Pittsburgh, PA 15201.
  - 8 2. Division of Anatomy, The Ohio State University College of Medicine, Columbus, OH
  - 9 43210.
  - 10 3. Department of Oral Biology, University of Pittsburgh/Children's Hospital of Pittsburgh,
  - 11 Pittsburgh, PA 15201.
  - 12 4. Department of Bioengineering, University of Pittsburgh/Children's Hospital of Pittsburgh,
  - 13 Pittsburgh, PA 15201.

14

15 *Email addresses:*

16 [James.gilbert2@chp.edu](mailto:James.gilbert2@chp.edu)

17 [James.Cray@osumc.edu](mailto:James.Cray@osumc.edu)

18 [joseph.losee@chp.edu](mailto:joseph.losee@chp.edu)

19 [Greg.cooper@chp.edu](mailto:Greg.cooper@chp.edu)

20

21 *Running Title:*

22

23 *Funding:* The work described within this study was funded through the Children's Fund of  
24 Children's Hospital of Pittsburgh of UPMC and through the Ross H. Musgrave Endowment  
25 (J.E.L).

26

27 *Conflicts of Interest:* There are no conflicts of interest to disclose.

28 *Corresponding Author:*

29 Dr. Gregory M. Cooper

30 Department of Plastic Surgery

31 3533 Rangos Research Building

32 530 45th St, Pittsburgh, PA 15201

33 412/692-5384 (office)

34 [greg.cooper@chp.edu](mailto:greg.cooper@chp.edu)

35

36 *Keywords:* young-onset; early-onset; cancer; familial; breast cancer

37

38 **ABSTRACT**

39 Breast cancer is a polygenic disorder and is the leading cause of cancer related mortality among  
40 women. Early-onset breast cancer (EOBC) is diagnosed in women prior to 45 years-of-age and is  
41 associated with worse clinical outcomes, a more aggressive disease phenotype, and poor prognosis  
42 for disease-free survival. While substantial progress has been made in defining the genetics of  
43 breast cancer, EOBC remains less well understood. In the current study we perform a retrospective  
44 analysis of data derived from *The Two Sister Study*. The use of alternate strategies for handling  
45 age-at-diagnosis in conjunction with haplotype-based methods yielded novel findings that help to  
46 explain the heritability of EOBC. These findings are validated through comparison against  
47 discordant sibs from *The Two Sister Study* as well as using data derived The Cancer Genome Atlas  
48 (TCGA).

## 49 INTRODUCTION

50 Breast cancer is the most frequently diagnosed oncogenic malignancy and a leading cause  
51 of cancer-related mortality among women worldwide (1, 2). Early-onset breast cancer (EOBC)  
52 accounts for approximately 5-10% of all new female breast cancer cases and young age at  
53 diagnosis correlates with worse clinical outcomes (3, 4). Germline variants play a prominent role  
54 in the etiology of breast cancer and an estimated 10-15% of women who develop breast cancer  
55 report a familial history of the disease. Germline variants in *BRCA1* or *BRCA2* are observed in 15-  
56 20% of familial breast cancer cases (5). Direct evidence for genetic modifiers of breast and ovarian  
57 cancer risk for *BRCA1* and *BRCA2* mutation carriers has been provided through genome-wide  
58 association study (GWAS) (6). Patients affected by EOBC exhibit shared patterns of gene  
59 expression that differ from their older counterparts (7). These combined observations suggest a  
60 genetic component contributes to EOBC although only a fraction of the heritability of EOBC has  
61 been explained.

62 Deciphering the genetic basis for phenotypic heterogeneity in complex diseases remains a  
63 major challenge. Single marker association studies often lack sufficient statistical power to support  
64 the discovery of rare variants or epistatic interactions within a polygenic architecture. Haplotype-  
65 based analysis is thought to have greater power than single marker association tests in the study of  
66 complex disease (8-10). Haplotypes, which consist of a series of sequentially ordered single  
67 nucleotide variants (SNVs), are a potentially more informative format for association testing than  
68 single markers and may have improved sensitivity and specificity for discovery (11, 12).  
69 Haplotype-based analysis has been used to gain insight in a wide array of complex disease models  
70 including mood disorders, multiple sclerosis, orofacial clefting, and cancer (13-18). Moreover,

71 haplotype-based analysis has been effectively applied to investigate age-of-onset in human disease  
72 although relatively few studies have specifically addressed EOBC (19-23).

73         Several approaches have been used to investigate the genetic regulation of breast cancer  
74 age-of-onset. *The Two Sister Study* made use of a familial case-control design with affected cases  
75 diagnosed  $\leq 50$  years-of-age and discordant sibs of EOBC patients defining a control population.  
76 Parental samples were included in *The Two Sister Study* to allow for the identification of  
77 maternally-mediated effects and Mendelian errors in transmission (24-26). Other studies have  
78 instead used categorical thresholding with diagnosis at 35, 40, 45, and 50-years-of-age to define  
79 EOBC populations contrasted against either unaffected familial controls or unrelated age-matched  
80 controls (3, 27-29). Age-of-onset has further been evaluated in terms of phenotypic extremes by  
81 comparing individuals diagnosed at  $\leq 35$  years-of-age against cancer-free controls at age  $\geq 60$  or  
82 against an age-specific cohort diagnosed with breast cancer at  $\geq 65$  years-of-age (30, 31). Still  
83 others have investigated breast cancer in terms of age-stratified risk or using quantitative trait  
84 analysis to support discovery. Internally consistent logic has justified the use of these and other  
85 study designs. Yet the genetic basis for EOBC remains poorly understood and more recent studies  
86 have turned towards meta-analyses aimed at achieving sufficient statistical power to identify rare  
87 variants with small effect size (32-34).

88         Design considerations for the study of complex polygenic disorders have been evaluated  
89 across a range of disease models. For example, Peyrot and colleagues have convincingly argued  
90 against familial trio designs when investigating complex disease traits with a polygenic  
91 architecture or a lifetime risk  $\geq 1\%$  (35). Reasons given included a potential for reduced statistical  
92 power, ascertainment bias, and a significant underestimation of SNV heritability. Additional  
93 considerations in sib pair study design include the potential for misclassification and/or

94 overmatching (36). Misclassification of discordant sibs presents a challenge primarily in cases  
95 associated with pronounced variation in age-of-onset. Overmatching presents a more significant  
96 challenge in complex disease models where discordant sibs are likely to share an indeterminate  
97 number of disease-related alleles. As a result, allele-frequency differences between affected and  
98 unaffected sibs are generally underestimated relative to randomly selected affected and unaffected  
99 individuals (36). Recent investigation of polygenic risk in multiplex melanoma families indicated  
100 that familial controls may carry a significantly elevated polygenic load relative to unrelated cases  
101 or healthy controls and thereby introduce bias (37). Kerber and colleagues likewise argued that  
102 familial studies should be approached with caution, particularly when investigating complex  
103 diseases such as cancer where variable onset, incomplete genetic penetrance, gene-environment  
104 interactions, and environmental phenocopies have a dramatic potential to impact disease  
105 occurrence and phenotype (38). The authors further argued in favor of a case-only analysis for an  
106 initial scan followed by more comprehensive analysis of regions surrounding initial hits using both  
107 affected and unaffected study participants. In keeping with this reasoning, we speculated that a  
108 comparison of younger and older patients diagnosed with breast cancer might provide insight into  
109 the genetic architecture of breast cancer age-of-onset.

110 We performed a retrospective analysis of “*The Two Sister Study: A Family-Based Study of*  
111 *Genes and Environment in Young-Onset Breast Cancer*,” hereafter referred to as “*The Two Sister*  
112 *Study*.” *The Two Sister Study* is one of the longest standing and best characterized studies of early-  
113 onset breast cancer and hence was chosen to establish proof-of-principle. Initial screening was  
114 performed using a case-only design and haplotype-based association testing while treating age-at-  
115 diagnosis as a categorical variable. Candidate regions identified through this initial screen were  
116 subsequently evaluated against discordant sibs defined within *The Two Sister Study* by variance

117 partition analysis and haplotype-trend regression. Findings were validated using data derived from  
118 phase III of the 1000 Genomes Project and mutation and The Cancer Genome Atlas (TCGA).

## 119 RESULTS

120 Our objective in this study was to investigate the genetic basis for EOBC. Access to *The*  
121 *Two Sister Study* was obtained through the Database of Genotypes and Phenotypes (dbGAP;  
122 accession phs000678.v1.p1). The demographics of the study population have been described  
123 elsewhere (25, 26, 39). The original study compared patients affected by young-onset breast cancer  
124 (age-at-diagnosis  $\leq 50$ ) with familial controls using a case-control design and affected status as a  
125 binary outcome. Pertinent populations for the purpose of this study included 1,456 cases affected  
126 by breast cancer and 525 discordant sibs.

127 For initial screening, the affected population was dichotomized by virtue of age-at-  
128 diagnosis using statistical modules within the %findcut SAS macro. The %findcut macro  
129 calculates thresholds for the dichotomization of continuous variables and plots a local linear  
130 regression (LOESS) curve which may be used to determine whether dichotomization is appropriate  
131 for the variable in question (40). While a continuous trait would be expected to produce a linear  
132 trend line with a slope  $\cong 0$ , the LOESS curve generated while analyzing *The Two Sister Study* case  
133 population failed to meet the assumption of linearity (**Supplemental Fig S1**). The observed slope  
134 and steep bend in the LOESS curve exhibited characteristics of a categorical variable justifying  
135 dichotomization of the affected population based upon age-at-diagnosis. Theoretical cutpoints  
136 were calculated using the %findcut macro and the mean value was used to distinguish between  
137 younger (diagnosis  $\leq 45$  years-of-age; N = 735) and older (diagnosis  $> 45$  years-of-age; N = 721)  
138 populations.

139 Candidate prioritization initially involved a comparison of the younger and older affected  
140 populations using haplotype-based association testing with an expectation-maximization (EM)  
141 algorithm and a dynamic window size of 10 kilobases (kb) (**Fig 1a**). Quantile-quantile plotting  
142 verified that the resulting data was normally distributed (**Supplemental Fig S2**). Several peaks  
143 were observed by Manhattan plot (**Fig 1a**) with 6 haplotypes located at chromosome 6:  
144 111,936,275-111,964,664 surpassing the threshold for genome-wide significance ( $p \leq 5 \times 10^{-8}$ ).  
145 This preliminary analysis identified 762 haploblocks representing 4,126 haplotypes (**Table 1**).  
146 Upon filtering using  $p > 5 \times 10^{-4}$  as a threshold for exclusion, 322 haplotypes within 282  
147 haploblocks spanning 64 discrete autosomal regions were retained. Of these 64 regions, 15 were  
148 associated with a single haploblock and 49 included two or more adjacent haploblocks with block  
149 clusters ranging from 2-14 haploblocks in length.

150 Fine mapping of the aforementioned chromosomal regions was performed using  
151 haplotype-based association testing and sliding windows of 2-6 SNVs in length as previously  
152 described by Mathias *et al.* (41). Assuming a panel of 684,126 variants and 3,420,615 independent  
153 tests across all windows a Bonferroni corrected threshold for genome-wide significance was  
154 calculated as  $p \leq 2.92 \times 10^{-8}$  using the method described by Song *et al* (42). A single-locus mixed  
155 model analysis was performed for comparison using an identity-by-state kinship matrix and an  
156 Efficient Mixed-Model Association eXpedited (EMMAX) algorithm as implemented in Sequence  
157 Variation Suite software (Golden Helix, Bozeman, MO). To facilitate direct comparison of single  
158 marker and haplotype-based analyses, Manhattan plots were overlaid (**Fig 1b**). Only windows of  
159 2, 4, and 6 SNVs in length were included within the composite plot for visual clarity. The  
160 composite image indicated haplotype-based testing generally outperformed single marker  
161 association testing and increasing haplotype window size generally correlated with improved

162 statistical strength. Haplotypes located at chromosome 6: 111,936,275-111,964,664 including the  
163 rs17754910 marker consistently exceeded the threshold for genome-wide significance with the  
164 most significant haplotype (GACGAA;  $p \leq 3.34 \times 10^{-10}$ ) consisting of markers rs671271,  
165 rs17754910, rs490080, rs1327199, rs9487771, and rs585057. Composite windows representing all  
166 haplotypes of 2-6 SNVs in length were filtered selecting for haplotypes with a  $\chi^2$  p value  $\leq 5 \times 10^{-5}$ .  
167 <sup>5</sup>. This filter was applied as an incremental step towards achieving our objective which was to  
168 identify regions where increasing haplotype structure correlated with improved significance. In  
169 total 466 haplotypes consisting of 417 unique variants spanning 165 unique haploblocks remained  
170 **(Table 1; Supplemental Table S1)**. Of the 165 haploblocks, ten were isolated and nonadjacent.  
171 Five of these blocks were excluded from further analysis because: 1) the component SNVs were  
172 represented in adjacent clusters (blocks 6611, 7202, 8926, and 9337); or, 2) the isolated block was  
173 weakly associated with an existing cluster (block 7489). The remaining isolated haploblocks  
174 (blocks 3738, 6951, 7182, 8759, and 9862) failed to exhibit a significant association with age-of-  
175 onset based on regression analysis and hence were excluded from further consideration. The  
176 remaining 155 haploblocks consisted of 264 unique SNVs and formed consecutive clusters  
177 defining 33 discrete chromosomal regions **(Supplemental Table S2)**. The most significant  
178 haploblocks within each of the 33 chromosomal regions are defined in **Supplemental Table S3**.

179 Visualization of haplotype structure was performed using the “Graphical Assessment of  
180 Sliding P-values” (GrASP) excel macro (41). The GrASP macro concisely depicts haplotype  
181 windows of varying length with corresponding p values, providing an efficient means for  
182 screening regions of interest while visualizing haplotype substructure. Of the chromosomal regions  
183 examined using the GrASP macro, 13 exhibited improvement in statistical significance and  
184 incremental changes in haplotype structure with increasing window size **(Table 1)**. Composite



185 images reflecting sliding window p values and the relative position of functional elements within  
186 candidate regions are depicted in **Fig 2**. Regions of interest exhibiting improved significance with  
187 increasing window size were associated with *TP73*, *LYPD6B*, *KIAA1109*, *ADAD1*, *IL2*, a  
188 regulatory enriched region on chromosome 6, *ARHGEF10*, *AGO2*, *CNNM1*, *LINC00941*,  
189 *PPFIBP1*, and non-coding loci including *ALI60035.1* and the *NEK4P1* pseudogene. As displayed  
190 in **Fig 2** the region defined on chromosome 6 was the only region to exceed the threshold for  
191 genome-wide significance. The region defined on chromosome 6 is functionally enriched  
192 consisting of predicted regulatory elements including promoter and promoter flanking regions,  
193 multiple enhancers, CTCF binding sites, and putative transcription factor binding sites. The nearest  
194 sequence element was *LINC02527* located within ~11 kb of the defined region on chromosome 6.  
195 Other regions of particular note identified through this screen included *ARHGEF10* and *IL2* both  
196 of which are listed within the COSMIC census of known cancer drivers. Odds ratios and 95%  
197 confidence intervals for the aforementioned chromosomal regions are portrayed as a forest plot  
198 comparing younger and older breast cancer populations in **Fig 3**. Positive correlations between  
199 candidate haplotypes and younger breast cancer patients (diagnosis  $\leq$  45 years-of-age) relative to  
200 older breast cancer patients (diagnosis = 46-50 years-of-age) were associated with *LYPD6B*, the  
201 long arm of chromosome 6, *AGO2*, *LINC00941*, and *PPFIBP1*. The most striking comparison was  
202 associated with *LYPD6B* with an OR = 6.95 and a 95% CI of 2.47-19.51. Negative correlations  
203 between candidate haplotypes and younger breast cancer patients (diagnosis  $\leq$  45 years-of-age)  
204 relative to older breast cancer patients (diagnosis = 46-50 years-of-age) were associated with *TP73*,  
205 *ADAD1*, *IL2*, *ARHGEF10*, *CNNM1*, the long arm of chromosome 13, and the long arm of  
206 chromosome 21.

207 Comparison of haplotype frequencies between siblings, however, failed to fully address  
208 the potential for overmatching as previously described (36). Correction for hidden population  
209 stratification through the use of kinship matrices provides an important and essential control in  
210 genotypic analyses but may be more robustly controlled for through population-based haplotype  
211 frequency analysis drawing upon data outside of the discovery population. Hence, we evaluated  
212 haplotype frequencies observed within *The Two Sister Study* against phase III data from the 1,000  
213 Genomes Project (**Fig 4**). Towards this end haplotype frequencies derived from The Two Sister  
214 Study were compared to haplotype frequencies observed in African (AFR), American (AMR),  
215 East Asian (EAS), and non-Finnish European (EUR) populations. Viewed within this context,  
216 haplotype frequencies within *The Two Sister Study* were elevated in comparison to AFR and/or  
217 AMR populations for *TP73*, the *KIAA1109* promoter, *ADAD1*, *IL2*, *ARHGEF10*, *CNNM1*, and  
218 the long arms of chromosomes 6, 13, and 21. Eight haplotypes did not occur within the EAS  
219 population. Minimal variation was observed in the non-Finnish EUR population relative to *The*  
220 *Two Sister Study*.

221 Haplotype trend regression was used to analyze the aforementioned 33 autosomal regions  
222 of interest in both affected (1,456 breast cancer patients) and unaffected (525 discordant sibs)  
223 populations as originally defined within *The Two Sister Study*. Whereas visual representation of  
224 data using the GrASP macro provided an intuitive sense of evolving haplotype structure, haplotype  
225 trend regression provided robust measures of statistical significance. Full model permuted p values  
226 indicated 14 of the 33 regions investigated were significantly associated with EOBC within the  
227 affected population (**Table 2**). Conversely, haplotype trend regression failed to detect significant  
228 associations between the candidate regions and discordant sibs. Haplomaps summarizing marker

229 distributions are presented in **Supplemental Figure S3** and marker characteristics are described  
230 in **Supplemental Table S4**.

231 In an attempt to validate our findings, we first analyzed breast cancer expression data  
232 obtained through cbiportal (43). The expression data included the “mRNA expression z-scores  
233 relative to normal samples (log RNA Seq V2 RSEM)” file and included representing 994 donors.  
234 Variance partition analysis was performed to evaluate associations between gene expression and  
235 age-at-diagnosis. Summary findings indicated that expression of *AGO2*, *KIAA1109*, and *PPFIBP1*  
236 was significantly associated with breast cancer age-at-diagnosis and explained 4.47% of age-  
237 related variance within the population (**Table 3**).

238 Subsequent analysis was performed in an attempt to correlate gene-specific mutation types  
239 with age-at-diagnosis. Due to the rarity of discrete mutation types the study population was  
240 expanded to include 30 studies across various tissues that were accessed through cbiportal.  
241 Pediatric studies were excluded from analysis and 20 years-of-age was applied as a cutoff to  
242 exclude minors. Subpopulations were defined by the affected gene and type of mutation  
243 (amplification, deletion, missense/truncating mutation). Significant associations linking age-at-  
244 diagnosis to (candidate x mutation type) were identified by two sample Z-test (**Table 4**). The mean  
245 age-at-diagnosis  $\pm$  standard deviation for controls was  $60.2 \pm 13.13$  years-of-age. Significant  
246 associations between age-at-diagnosis and gene-specific copy number variants involving  
247 amplifications were observed in *ARHGEF10* ( $63 \pm 10.86$ ;  $p = 0.029$ ); *CNNMI* ( $54.2 \pm 11.61$ ;  $p =$   
248  $0.004$ ); *LYPD6B* ( $57.5 \pm 13.39$ ;  $p = 0.04$ ); and *TP73* ( $62.9 \pm 10.38$ ;  $p = 0.021$ ). Significant  
249 associations between age-at-diagnosis and gene-specific copy number variants involving deletions  
250 were observed in *ADADI* ( $64.4 \pm 10.06$ ;  $p = 0.0047$ ); *AGO2* ( $64.6 \pm 11.02$ ;  $p = 0.022$ ); *CNNMI*  
251 ( $66.1 \pm 10.42$ ;  $p = 0.00011$ ); *IL2* ( $64.4 \pm 10.06$ ;  $p = 0.0047$ ); *KIAA1109* ( $64.6 \pm 9.57$ ;  $p = 0.0023$ );

252 and *LYPD6B* ( $64.8 \pm 10.36$ ;  $p = 0.00091$ ). Significant associations involving missense/truncating  
253 mutations followed a trend similar to that observed in association with deletions as might be  
254 expected in terms of functional consequence.

## 255 **DISCUSSION**

256 Our objective in this retrospective study was to gain insight into the genetics of EOBC  
257 using existing data sets. We proposed to do so through a subtle rephrasing of the initial hypothesis  
258 and by applying haplotype-based methods rather than single marker tests of association. *The Two*  
259 *Sister Study* data set was chosen for retrospective analysis because it is among the best  
260 characterized studies involving EOBC and because the data structure lends itself to formation of  
261 alternative hypotheses. We believe there is a need to explore alternatives in the study of complex  
262 disease in general because the greater portion of phenotypic heterogeneity in complex disease  
263 remains unexplained. By way of example the investigation of breast cancer has resulted in the  
264 identification of a handful of genetic drivers with large effect and more than 200 susceptibility loci  
265 with minor effect explaining less than half of breast cancer heritability. Known drivers associated  
266 with EOBC are less well defined. Yet EOBC accounts for an estimated 10% of all new breast  
267 cancer cases among women and an estimated 15% of breast cancer deaths result from breast  
268 cancers initially diagnosed prior to 45 years-of-age (3, 44).

269 *The Two Sister Study* made use of a familial study design to identify maternally-mediated  
270 affects and germline associations with EOBC by contrasting breast cancer patients diagnosed prior  
271 to the age of 50 against discordant siblings (25, 26). In the current study we addressed a different  
272 question and hypothesized that candidate associations with EOBC might more readily be identified  
273 by contrasting younger and older cases of breast cancer. This supposition is consistent with

274 arguments presented by Kerber and colleagues (38), although the merits of treating age as a  
275 categorical variable remains a subject of debate (45-47).

276 Initial haplotype-based association studies to compare cases (age-at-diagnosis  $\leq 45$ ) and  
277 controls (age-at-diagnosis = 46-50) yielded normally distributed results as determined by QQ plot.  
278 Preliminary screening alone identified a single SNV exceeding genome-wide significance  
279 (rs17754910;  $p = 4.73 \times 10^{-9}$ , FDR = 0.0016). Haplotype-based association testing and sliding  
280 window analysis helped identify 33 chromosomal regions of interest, 13 of which exhibited  
281 increasing haplotype structure in conjunction with improved measures of significance. The  
282 qualitative observations resulting from sliding window analysis were subsequently corroborated  
283 by haplotype trend regression with 14 of the 33 candidate regions achieving a permuted  $p$  value  $\leq$   
284 0.05. It should be noted that the only haplotypes to achieve genome-wide significance by means  
285 of haplotype-based association testing included the rs17754910 SNV on chromosome 6 in a region  
286 enriched with regulatory elements. The nearest sequence element approximately 11 kb upstream  
287 of the rs17754910 SNV is the non-coding *LINC02527* RNA (chromosome 6: 111,900,306-  
288 111,909,395). We note that alternating methylation patterns are observed within the *LINC02527*  
289 promoter in various cancers including breast cancer (48). Other candidates identified by haplotype  
290 trend regression included the known cancer drivers *IL2* and *ARHGEF10* (interleukin 2 and rho  
291 guanine nucleotide exchange factor 10, respectively) neither of which have previously been  
292 associated with an early-onset cancer phenotype. The remaining candidates identified by haplotype  
293 trend regression may be broadly categorized in terms of known involvement in cancer, metastasis,  
294 and age-of-onset in disease. *AGO2* (argonaute 2), *CNNM1* (cyclin and CBS domain divalent metal  
295 cation transport mediator 1), *KIAA1109*, and *TP73* (tumor promoter 73) have been implicated in  
296 breast cancer, metastasis, and disease age-of-onset (49-57). The noncoding *LINC00941* RNA,

297 *LYPD6B* (LY6/PLAUR Domain Containing 6B), and *PPFIBP1* (liprin-beta-1) have been  
298 implicated in cancers that may or may not include breast cancer, have been implicated in  
299 metastasis, but have no known association with disease age-of-onset (58-61). *ADADI* (adenosine  
300 deaminase domain containing 1) has no known association with cancer but has been associated  
301 with early-onset asthma and may have a role in childhood seizures. Last, the *NEK4P1* pseudogene  
302 and the AL160035.1 sequence have no known associations with cancer, metastasis, or disease  
303 onset. Though not addressed within the body of this study, we note that Ingenuity Pathway  
304 Analysis associated *AGO2*, *ARHGEF10*, *CNNM1*, *IL2*, *KIAA1109*, *LYPD6B*, *PPFIBP1*, and *TP73*  
305 with a single network centered around nodes formed by *TP53* and the estrogen receptor. We note  
306 the obvious absence of *BRCA1/BRCA2* within the network and mention it here as an anecdote  
307 worthy of speculation.

308 Haplotype frequency analysis within *The Two Sister Study* and phase III data from the 1000  
309 Genomes Project yielded insight specifically with regard to the potential hazards of overmatching  
310 in study design. As mentioned overmatching presents a potentially significant challenge in  
311 complex disease models where discordant sibs are likely to share an indeterminate number of  
312 disease-related alleles (36). If, as suggested by the current literature, hundreds of discrete  
313 susceptibility loci control breast cancer occurrence and phenotypic expression, we must consider  
314 the possibility that familial controls carry a greater burden of polygenic risk alleles without  
315 necessarily experiencing disease occurrence. Because no single allele drives breast cancer  
316 occurrence, it logically follows that differences in allele or haplotype frequencies between  
317 discordant sibs may lack the capacity to distinguish between alleles associated with phenotypic  
318 heterogeneity in complex disease. It is known that familial controls may carry a significantly  
319 elevated polygenic load relative to unrelated cases or healthy controls creating an uncontrolled

320 source of bias in discovery (37). By way of example we note that haplotype frequencies are  
321 elevated in discordant sibs relative to affected breast cancer patients for *TP73*, *IL2*, and  
322 *ARHGEF10* (**Fig 3**). *IL2* and *ARHGEF10* are both listed within the COSMIC census of known  
323 cancer drivers and it does not require a stretch of the imagination to consider that *TP73* might play  
324 a role in breast cancer. Based solely upon haplotype frequencies observed in discordant sibs, it  
325 would appear that all three haplotypes are negatively correlated with EOBC. Yet the observed  
326 haplotype frequencies for these three genes within *The Two Sister Study* are elevated when  
327 compared to the 1000 genomes phase III AMR population by 1.54-fold, 1.68-fold, and 1.82-fold,  
328 respectively. The undefined element on chromosome 21 is elevated by 18.86-fold relative to the  
329 AFR population although the very same haplotype is more abundant in discordant sib controls  
330 relative to breast cancer patients diagnosed at  $\leq 50$  years-of-age.

331         Because this study was retrospective a replication of our findings would be challenging  
332 without a prospective collection of new data, something which is beyond the scope of the current  
333 study. In the absence of replication, we have attempted to validate our findings with supporting  
334 evidence as a matter of due diligence. Towards this goal breast cancer gene expression data derived  
335 from the TCGA pan-cancer study was evaluated using regression modeling and variance partition  
336 analysis to identify correlations between gene expression and age-at-diagnosis. Earlier age-at-  
337 diagnosis was associated with higher expression of *AGO2* ( $p = 1.19 \times 10^{-4}$ ), *KIAA1109* ( $p = 1.13$   
338  $\times 10^{-5}$ ), and *PPFIBP1* ( $p = 1.07 \times 10^{-3}$ ). These findings are consistent with prior studies involving  
339 *AGO2* and *KIAA1109* and provide new evidence suggesting a potential association of *PPFIBP1*  
340 expression in EOBC (50, 54). Under the assumption of an additive model, expression of these  
341 three genes was calculated to explain a combined 4.47% of age-related variance within the study  
342 population.

343           Subsequent validation involved the evaluation of age-at-diagnosis as a function of gene-  
344 specific mutations drawing upon available data from 30 distinct cancer studies for statistical  
345 purposes. Of the gene-specific mutations the vast majority were observed to result in a significant  
346 increase in the mean age-at-diagnosis. We speculate that most of these mutations are unlikely to  
347 be causally associated with late-onset disease and instead reflect the global accumulation of  
348 damage as a secondary consequence of errors in DNA repair. The candidate genes *CNNMI* and  
349 *LYPD6B* shared a unique feature, though, in that both exhibited bidirectionality of effect depending  
350 upon mutation status. Gene amplifications affecting *CNNMI* and *LYPD6B* were associated with a  
351 significantly lower mean age-at-diagnosis ( $54.2 \pm 11.61$  and  $57.5 \pm 13.39$  years-of-age,  
352 respectively). Deletions affecting *CNNMI* and *LYPD6B* were conversely associated with a  
353 significant increase in mean age-at-diagnosis ( $66.1 \pm 10.42$  and  $64.8 \pm 10.36$  years-of-age,  
354 respectively). This bidirectionality of effect, we believe, is sufficiently compelling to warrant  
355 further investigation of *CNNMI* and *LYPD6B* as contributory factors in EOBC.

356           Complex disease phenotypes remain a major challenge in the genomic sciences.  
357 Frequentist strategies, based upon the assumption that more data will translate into more insight,  
358 are currently in vogue and serve a valuable purpose. The identification of rare variants associated  
359 with disease is a matter of sample size and ongoing efforts to integrate disparate data sets for meta-  
360 analysis is a monumental challenge. Our objective in the current study is less ambitious and merely  
361 asks if we can repurpose data to improve our understanding of complex disease. To that limited  
362 extent, we have achieved our goal. We have identified a new candidate of genome-wide  
363 significance with a potential role in EOBC. We have provided strong supporting evidence  
364 justifying the pursuit of a handful of priority candidates with a potential role in EOBC. We have  
365 identified two known cancer drivers with a potential involvement in disease onset. And, we have



366 highlighted conditions where frequentist analysis may lead to questionable conclusions in the  
367 analysis of familial data. Data-mining, in this instance, suggests that there may be merit in re-  
368 examining existing data and the assumptions made during initial inquiry.

## 369 METHODS

370 **Data: *The Two Sister Study*.** Discovery was performed using data derived from *The Two Sister*  
371 *Study: A Family-Based Study of Genes and Environment in Young-Onset Breast Cancer* (accession  
372 phs000678.v1.p1). Study contents were accessed under a Data Use Certification (DUC)  
373 Agreement via the Database of Genotypes and Phenotypes (dbGAP). The dataset includes  
374 genotypic, phenotypic, and demographic data for 1,456 patients, 525 discordant sib controls, and  
375 an additional 1,359 controls. The demographics of the population have been described (25, 26,  
376 39). The parent study described 1,458 patients. We believe two of these patients were erroneously  
377 excluded from the present study during filtering to eliminate duplicate samples. Quality control  
378 filtering of the corresponding genotypic data retained a total of 684,126 variants with a call rate  $\geq$   
379 0.99, a minor allele frequency  $\geq 0.05$ , and a Hardy-Weinberg p value  $\geq 1 \times 10^{-6}$  within the older  
380 “control” population.

381 **Data: cbiportal.** In order to validate initial findings clinical data spanning 30 studies representing  
382 10,902 donors was accessed through cbiportal (43). A total of 220 donors were excluded due to  
383 cross-study differences in the definition of donor age. An additional 23 donors diagnosed prior to  
384 the age of 20 were excluded as minors. The studies were selected based on three criteria: 1) existing  
385 evidence of an early-onset cancer phenotype within the tissue; 2) the availability of data defining  
386 age-at-diagnosis; and 3) exclusion of pediatric studies. Composite data included the following  
387 studies: Acute Myeloid Leukemia (OHSU) (62), Breast Cancer (METABRIC) (63, 64), Breast  
388 Cancer (SMC) (65), Breast Fibroepithelial Tumors (Duke-NUS) (66), Breast Invasive Carcinoma  
389 (British Columbia) (67), Breast Invasive Carcinoma (Broad) (68), Breast Invasive Carcinoma  
390 (Sanger) (69), Breast Invasive Carcinoma (TCGA, PanCancer Atlas) (70), Cervical Squamous Cell  
391 Carcinoma (TCGA, PanCancer Atlas) (71), Clear Cell Renal Cell Carcinoma (DFCI) (72),

392 Colorectal Adenocarcinoma (DFCI) (73), Colorectal Adenocarcinoma (TCGA, PanCancer Atlas)  
393 (71), Esophageal Adenocarcinoma (TCGA, PanCancer Atlas) (71), Esophageal Squamous Cell  
394 Carcinoma (ICGC) (74), Esophageal Squamous Cell Carcinoma (UCLA) (75), Kidney  
395 Chromophobe (TCGA, PanCancer Atlas) (71), Kidney Renal Clear Cell Carcinoma (BGI) (76),  
396 Kidney Renal Clear Cell Carcinoma (IRC) (77), Kidney Renal Clear Cell Carcinoma (TCGA,  
397 PanCancer Atlas), Kidney Renal Papillary Cell Carcinoma (TCGA, PanCancer Atlas) (71), Liver  
398 Hepatocellular Carcinoma (TCGA, PanCancer Atlas) (71), Lung Adenocarcinoma (OncoSG) (78),  
399 Lung Adenocarcinoma (TCGA, PanCancer Atlas) (71), Ovarian Serous Cystadenocarcinoma  
400 (TCGA, PanCancer Atlas) (71), Prostate Adenocarcinoma (Broad/Cornell) (79), Prostate  
401 Adenocarcinoma (Fred Hutchinson CRC) (80), Prostate Adenocarcinoma (TCGA, PanCancer  
402 Atlas) (71), Small Cell Carcinoma of the Ovary (MSKCC) (81), Uterine Carcinosarcoma (Johns  
403 Hopkins) (82), and Uterine Corpus Endometrial Carcinoma (TCGA, PanCancer Atlas) (71).  
404 Samples lacking mutation in any of the candidate genes were assembled into a control dataset (N  
405 = 7026). In order to validate initial findings, experimental data sets were assembled on a per gene  
406 basis and subcategorized according to mutation type (amplification, deep deletion, or  
407 missense/truncating mutations).

408 **Data: The 1000 Genomes Project.** Genotypic data from phase III of the 1000 Genomes Project  
409 was obtained through the Ensembl data portal Donor identification numbers were matched to  
410 genotypic data in order to assemble haplotypes. Quantification of haplotype frequencies was  
411 subsequently performed using the Haploview software package.

412 **Cutpoint optimization.** The %findcut SAS macro was used to calculate cutpoints as previously  
413 described (83). The mean value was used as the cutoff for dichotomizing the case population in all  
414 subsequent analyses.

415 **Association testing.** All association testing was performed using the Sequence Variation Suite  
416 software package (Golden Helix, Bozeman, MO) and a custom workstation with dual Xeon Gold  
417 12-core processors and 192 Gb RAM (Thinkmate, Waltham, MA). Genotypic data sourced from  
418 *The Two Sister Study* was filtered to exclude variants with a call rate  $\leq 0.99$ , a minor allele  
419 frequency  $< 0.05$ , or extremes in Hardy-Weinberg disequilibrium within the control population ( $p$   
420  $\leq 1 \times 10^{-6}$ ). In order to identify regions of interest, haplotype-based association testing was  
421 performed using an EM algorithm (50-iterations, convergence tolerance = 0.0001, frequency  
422 threshold = 0.01) and a dynamic window size of 10 kilobases (kb). Covariates in the analysis  
423 included race, family history of disease occurrence, and age-at-menopause. Regions of interest  
424 were identified using a threshold of  $p \leq 5 \times 10^{-4}$ .

425 **Sliding window haplotype-based association testing.** Sliding window analysis was performed  
426 essentially as described by Mathias *et al* (41). Genotypic data from patients affected by breast  
427 cancer was filtered as described leaving a total of 684,126 variants for analysis. Sliding window  
428 analysis was subsequently performed using windows of varying size (2-6 SNPs) to evaluate  
429 unphased haplotypes. Analysis was performed using a case-control design and an EM algorithm  
430 (50-iterations, convergence tolerance = 0.0001, haplotype frequency threshold = 0.01). Applied  
431 test statistics consisted of a single test per sliding window and not the individual tests for each  
432 haplotype. For comparison, a single-locus Efficient Mixed-Model Association eXpedited  
433 (EMMAX) analysis was performed under an additive model using Sequence Variation Suite  
434 software (Golden Helix).

435 **Manhattan plots.** Manhattan plots were generated by plotting of observed versus expected  $-\log[p]$   
436 values. A single plot was constructed using output from haplotype-based association testing with  
437 a static window size of 10 kb for reference. A second composite plot was constructed by overlaying

438 the output from single marker association tests and sliding window association tests using windows  
439 of 2, 4, and 6 SNVs in length.

440 **Graphical assessment of p-values from sliding window haplotype tests (GrASP).** GrASP is a  
441 graphical tool for displaying p-values from sliding window tests (41). The Excel add-on produces  
442 a simple graphic that simultaneously depicts the width of the sliding windows while using user-  
443 specified color to specify varying levels of significance. GrASP allows the user to identify  
444 regions/blocks of interest, based jointly on the absolute p-value of the tests from these windows  
445 and the building of haplotypes of significance in the region. Graphical representations for regions  
446 of interest were assembled and trimmed to display regions of increasing significance while  
447 minimizing the length of flanking sequence falling below a threshold of  $p < 5 \times 10^{-5}$ . Assembled  
448 images were presented within the context of functional genomic elements as defined within the  
449 Ensembl human genome browser (GRCh38). GrASP is freely available for use at:  
450 <http://research.nhgri.nih.gov/GrASP/>.

451 **Forest plot.** Odds ratios (OR) and 95% confidence intervals (95% CI) were derived from a single  
452 overall test per sliding window, and not the individual tests of deviation for each haplotype.  
453 Weighting was performed using  $-(\log[p])$  as the weighting variable so that symbol size directly  
454 correlated with significance. A Forest plot depicting the OR and 95% CI was generated using the  
455 “DistillerSR Forest Plot Generator from Evidence Partners” web resource  
456 (<https://www.evidencepartners.com/resources/forest-plot-generator/>).

457 **Haplotype trend regression.** Haplotype trend regression was performed using the Sequence  
458 Variation Suite software package (Golden Helix). Analysis was performed using predefined blocks  
459 as described within the text and **Supplemental Table S3**. Stepwise regression was performed  
460 using backwards elimination and up to 50 EM iterations with a convergence tolerance of 0.0001

461 and frequency threshold of 0.01. Full versus reduced model regression was performed using age-  
462 at-diagnosis as a quantitative trait, with race, family history of disease, and menopause status as  
463 covariates. Correction for multiple testing was performed using Bonferroni adjusted p values and  
464 1,000 full scan permutations.

465 **Haplotype frequency analysis.** EM frequencies representing the 1,456 cases defined in *The Two*  
466 *Sister Study* were contrasted against population-specific haplotype frequencies. Population-  
467 specific data was gathered from phase III of the 1000 Genomes Project and haplotype frequencies  
468 were determined using Haploview software (84).

469 **Variance partition analysis.** Data derived from the TCGA Pancancer Atlas Breast Invasive  
470 Carcinoma study (70) was evaluated in the R software environment using the VariancePartition  
471 application (85). Expression data consisted of z-score measures relative to normal samples  
472 obtained through cbioportal. Expression data was unavailable for *ADADI* and hence this candidate  
473 was excluded from the analysis. Age-at-diagnosis was correlated with expression data as  
474 previously described.

475 **Pancancer mutation analysis.** To evaluate the impact of mutation type on cancer age-of-onset  
476 meta-data representing 9 candidate genes from 30 studies was obtained as described. A total of  
477 220 donors were excluded due to cross-study differences in the definition of donor age. Pertinent  
478 data included age-at-diagnosis/diagnosis age, gene-specific copy number variants, gene-specific  
479 coding variants (missense/truncating). Samples lacking mutation in any of the candidate genes  
480 were assembled into a control dataset (N = 7026). Experimental populations were defined on a per  
481 gene basis and were classified by mutation type (amplifications, deep deletions, or  
482 missense/truncating mutations). Distribution analysis was performed using a two sample Z-test

483 and the equation  $Z = (\bar{X}_1 - \bar{X}_2) / \sqrt{\sigma_{\bar{X}_1}^2 + \sigma_{\bar{X}_2}^2}$  where  $\bar{X}_1$  is the mean age-at-diagnosis for the control  
484 population,  $\bar{X}_2$  is the mean age-at-diagnosis for the case population,  $\sigma_{\bar{X}_1}^2$  is the standard deviation  
485 for the control population divided by the square root of the number of data points, and  $\sigma_{\bar{X}_2}^2$  is the  
486 standard deviation for the case population divided by the square root of the number of data points.  
487 Corresponding p values were calculated for each independent test statistic.

488 **ACKNOWLEDGMENTS**

489 We acknowledge the Two Sister Study PI, Clarice R. Weinberg, Susan G. Komen for the Cure  
490 (grant FAS703856) and the Intramural Program of the National Institute of Environmental Health  
491 Sciences. Fei, Cl, DeRoo, L., Sandler, D.P. and Weinberg, C.R. Fertility drugs and young-onset  
492 breast cancer: Results from the Two Sister Study. Journal of the National Cancer Institute 104(13):  
493 1021-7, 2012 (PMID 22773825).(86) Without the invaluable work of the aforementioned  
494 investigators, the present analysis would not be possible.

495



496 **BIBLIOGRAPHY**

- 497 1. K. Michailidou *et al.*, Genome-wide association analysis of more than 120,000 individuals  
498 identifies 15 new susceptibility loci for breast cancer. *Nature genetics* **47**, 373-380 (2015).
- 499 2. F. Bray *et al.*, Global cancer statistics 2018: GLOBOCAN estimates of incidence and mortality  
500 worldwide for 36 cancers in 185 countries. *CA Cancer J Clin* **68**, 394-424 (2018).
- 501 3. D. Chelmow *et al.*, Executive Summary of the Early-Onset Breast Cancer Evidence Review  
502 Conference. *Obstetrics & Gynecology* **135**, 1457-1478 (2020).
- 503 4. H. A. Assi *et al.*, Epidemiology and prognosis of breast cancer in young women. *Journal of*  
504 *Thoracic Disease*, S2-S8 (2013).
- 505 5. K. E. Malone *et al.*, Prevalence and predictors of BRCA1 and BRCA2 mutations in a population-  
506 based study of breast cancer in white and black American women ages 35 to 64 years. *Cancer*  
507 *research* **66**, 8297-8308 (2006).
- 508 6. M. M. Gaudet *et al.*, Identification of a BRCA2-specific modifier locus at 6p24 related to breast  
509 cancer risk. *PLoS genetics* **9**, e1003173 (2013).
- 510 7. C. K. Anders *et al.*, Young Age at Diagnosis Correlates With Worse Prognosis and Defines a  
511 Subset of Breast Cancers With Shared Patterns of Gene Expression. *Journal of Clinical Oncology*  
512 **26**, 3324-3330 (2008).
- 513 8. R. W. Morris, N. L. Kaplan, On the advantage of haplotype analysis in the presence of multiple  
514 disease susceptibility alleles. *Genetic epidemiology* **23**, 221-233 (2002).
- 515 9. J. Akey, L. Jin, M. Xiong, Haplotypes vs single marker linkage disequilibrium tests: what do we  
516 gain? *European Journal of Human Genetics* **9**, 291-300 (2001).
- 517 10. Y. He *et al.*, Accelerating haplotype-based genome-wide association study using perfect  
518 phylogeny and phase-known reference data. *PLoS one* **6**, e22097 (2011).
- 519 11. The International HapMap Project. *Nature* **426**, 789-796 (2003).

- 520 12. Y. Wang, J. Lu, J. Yu, R. A. Gibbs, F. Yu, An integrative variant analysis pipeline for accurate  
521 genotype/haplotype inference in population NGS data. *Genome research* **23**, 833-842 (2013).
- 522 13. D. M. Howard *et al.*, Genome-wide haplotype-based association analysis of major depressive  
523 disorder in Generation Scotland and UK Biobank. *Translational psychiatry* **7**, 1263 (2017).
- 524 14. M. Shi *et al.*, Genome wide study of maternal and parent-of-origin effects on the etiology of  
525 orofacial clefts. *American journal of medical genetics. Part A* **158a**, 784-794 (2012).
- 526 15. P. Khankhanian, P. A. Gourraud, A. Lizee, D. S. Goodin, Haplotype-based approach to known MS-  
527 associated regions increases the amount of explained risk. *Journal of medical genetics* **52**, 587-  
528 594 (2015).
- 529 16. D. M. Howard *et al.*, Genome-wide haplotype-based association analysis of major depressive  
530 disorder in Generation Scotland and UK Biobank. *Translational psychiatry* **7**, 1263 (2017).
- 531 17. L. H. Pereira *et al.*, The BRCA1 Ashkenazi founder mutations occur on common haplotypes and  
532 are not highly correlated with anonymous single nucleotide polymorphisms likely to be used in  
533 genome-wide case-control association studies. *BMC Genet* **8**, 68 (2007).
- 534 18. Q. Wang *et al.*, Genome-wide haplotype association study identifies BLM as a risk gene for  
535 prostate cancer in Chinese population. *Tumour Biol* **36**, 2703-2707 (2015).
- 536 19. M. G. Kibriya *et al.*, A pilot genome-wide association study of early-onset breast cancer. *Breast*  
537 *cancer research and treatment* **114**, 463-477 (2009).
- 538 20. J. S. Barnholtz-Sloan *et al.*, FGFR2 and other loci identified in genome-wide association studies  
539 are associated with breast cancer in African-American and younger women. *Carcinogenesis* **31**,  
540 1417-1423 (2010).
- 541 21. L. Jara *et al.*, Genetic variants in FGFR2 and MAP3K1 are associated with the risk of familial and  
542 early-onset breast cancer in a South-American population. *Breast cancer research and treatment*  
543 **137**, 559-569 (2013).

- 544 22. K. L. Huang *et al.*, A common haplotype lowers PU.1 expression in myeloid cells and delays onset  
545 of Alzheimer's disease. *Nature neuroscience* **20**, 1052-1061 (2017).
- 546 23. K. S. Wang *et al.*, Genetic association analysis of ITGB3 polymorphisms with age at onset of  
547 schizophrenia. *J Mol Neurosci* **51**, 446-453 (2013).
- 548 24. in *Global registry and database on craniofacial anomalies*. (World Health Organization).
- 549 25. K. M. O'Brien *et al.*, A family-based, genome-wide association study of young-onset breast  
550 cancer: inherited variants and maternally mediated effects. *European journal of human genetics*  
551 : *EJHG* **24**, 1316-1323 (2016).
- 552 26. M. Shi *et al.*, Previous GWAS hits in relation to young-onset breast cancer. *Breast cancer*  
553 *research and treatment* **161**, 333-344 (2017).
- 554 27. G. S. Dite *et al.*, Increased cancer risks for relatives of very early-onset breast cancer cases with  
555 and without BRCA1 and BRCA2 mutations. *British Journal of Cancer* **103**, 1103-1108 (2010).
- 556 28. C. K. Anders, R. Johnson, J. Litton, M. Phillips, A. Bleyer, Breast cancer before age 40 years.  
557 *Semin Oncol* **36**, 237-249 (2009).
- 558 29. M. V. Diaz-Santana *et al.*, Perinatal and postnatal exposures and risk of young-onset breast  
559 cancer. *Breast Cancer Research* **22**, 88 (2020).
- 560 30. I. Sepahi *et al.*, Investigating the effects of additional truncating variants in DNA-repair genes on  
561 breast cancer risk in BRCA1-positive women. *BMC Cancer* **19**, 787 (2019).
- 562 31. C. K. Anders *et al.*, Young age at diagnosis correlates with worse prognosis and defines a subset  
563 of breast cancers with shared patterns of gene expression. *J Clin Oncol* **26**, 3324-3330 (2008).
- 564 32. K. Michailidou *et al.*, Genome-wide association analysis of more than 120,000 individuals  
565 identifies 15 new susceptibility loci for breast cancer. *Nature genetics* **47**, 373-380 (2015).
- 566 33. K. Michailidou *et al.*, Association analysis identifies 65 new breast cancer risk loci. *Nature* **551**,  
567 92-94 (2017).

- 568 34. L. Wu *et al.*, A transcriptome-wide association study of 229,000 women identifies new candidate  
569 susceptibility genes for breast cancer. *Nature genetics* **50**, 968-978 (2018).
- 570 35. W. J. Peyrot, D. I. Boomsma, B. W. Penninx, N. R. Wray, Disease and Polygenic Architecture:  
571 Avoid Trio Design and Appropriately Account for Unscreened Control Subjects for Common  
572 Disease. *American journal of human genetics* **98**, 382-391 (2016).
- 573 36. M. Boehnke, C. D. Langefeld, Genetic association mapping based on discordant sib pairs: the  
574 discordant-alleles test. *American journal of human genetics* **62**, 950-961 (1998).
- 575 37. M. H. Law *et al.*, Multiplex melanoma families are enriched for polygenic risk. *Human molecular*  
576 *genetics* **29**, 2976-2985 (2020).
- 577 38. R. A. Kerber, C. I. Amos, B. Y. Yeap, D. M. Finkelstein, D. C. Thomas, Design considerations in a  
578 sib-pair study of linkage for susceptibility loci in cancer. *BMC Med Genet* **9**, 64 (2008).
- 579 39. M. Shi, K. M. O'Brien, C. R. Weinberg, Interactions between a Polygenic Risk Score and Non-  
580 genetic Risk Factors in Young-Onset Breast Cancer. *Sci Rep* **10**, 3242 (2020).
- 581 40. J. Meyers, J. Mandrekar, in *Proc SAS Glob Forum*. (2015), vol. 3249.
- 582 41. R. A. Mathias *et al.*, A graphical assessment of p-values from sliding window haplotype tests of  
583 association to identify asthma susceptibility loci on chromosome 11q. *BMC Genet* **7**, 38 (2006).
- 584 42. C. Song *et al.*, A genome-wide scan for breast cancer risk haplotypes among African American  
585 women. *PloS one* **8**, e57298-e57298 (2013).
- 586 43. J. Gao *et al.*, Integrative analysis of complex cancer genomics and clinical profiles using the  
587 cBioPortal. *Sci Signal* **6**, pl1 (2013).
- 588 44. K. C. Oeffinger *et al.*, Breast Cancer Screening for Women at Average Risk: 2015 Guideline  
589 Update From the American Cancer Society. *Jama* **314**, 1599-1614 (2015).
- 590 45. D. G. Altman, P. Royston, The cost of dichotomising continuous variables. *Bmj* **332**, 1080 (2006).

- 591 46. R. C. MacCallum, S. Zhang, K. J. Preacher, D. D. Rucker, On the practice of dichotomization of  
592 quantitative variables. *Psychol Methods* **7**, 19-40 (2002).
- 593 47. O. Naggara *et al.*, Analysis by Categorizing or Dichotomizing Continuous Variables Is Inadvisable:  
594 An Example from the Natural History of Unruptured Aneurysms. *American Journal of*  
595 *Neuroradiology* **32**, 437-440 (2011).
- 596 48. L. Ma *et al.*, LncBook: a curated knowledgebase of human long non-coding RNAs. *Nucleic acids*  
597 *research* **47**, D128-d134 (2019).
- 598 49. T. Bellissimo *et al.*, Argonaute 2 drives miR-145-5p-dependent gene expression program in  
599 breast cancer cells. *Cell Death & Disease* **10**, 17 (2019).
- 600 50. M. C. Casey *et al.*, Quantifying Argonaute 2 (Ago2) expression to stratify breast cancer. *BMC*  
601 *Cancer* **19**, 712 (2019).
- 602 51. F. Chen, Y. Zhang, S. Varambally, C. J. Creighton, Molecular Correlates of Metastasis by  
603 Systematic Pan-Cancer Analysis Across The Cancer Genome Atlas. *Mol Cancer Res* **17**, 476-487  
604 (2019).
- 605 52. U. Chandran *et al.*, Expression of Cnm1 and Its Association with Stemness, Cell Cycle, and  
606 Differentiation in Spermatogenic Cells in Mouse Testis. *Biol Reprod* **95**, 7 (2016).
- 607 53. Z. Qiao *et al.*, Mutations in KIAA1109, CACNA1C, BSN, AKAP13, CELSR2, and HELZ2 Are  
608 Associated With the Prognosis in Endometrial Cancer. *Frontiers in genetics* **10**, 909-909 (2019).
- 609 54. M. T. Kuo *et al.*, Association of fragile site-associated (FSA) gene expression with epithelial  
610 differentiation and tumor development. *Biochem Biophys Res Commun* **340**, 887-893 (2006).
- 611 55. M. Dutertre *et al.*, Exon-based clustering of murine breast tumor transcriptomes reveals  
612 alternative exons whose expression is associated with metastasis. *Cancer research* **70**, 896-905  
613 (2010).

- 614 56. J. Yao *et al.*, TP73-AS1 promotes breast cancer cell proliferation through miR-200a-mediated  
615 TFAM inhibition. *J Cell Biochem* **119**, 680-690 (2018).
- 616 57. J. Zhang *et al.*, FDXR regulates TP73 tumor suppressor via IRP2 to modulate aging and tumor  
617 suppression. *The Journal of Pathology* **251**, 284-296 (2020).
- 618 58. H. Liu *et al.*, Long Non-coding RNA LINC00941 as a Potential Biomarker Promotes the  
619 Proliferation and Metastasis of Gastric Cancer. *Frontiers in genetics* **10**, 5 (2019).
- 620 59. Y. Shoji, G. Ch, ramouli, J. Risinger, Over-Expression of Ly6/Plaur Domain Containing 6b (Lypd6b)  
621 in Ovarian Cancer. *Gynecology & Obstetrics* **1**, 1-10 (2011).
- 622 60. Serra-Pagh, Liprins, a Family of LAR Transmembrane Protein-tyrosine Phosphatase-interacting  
623 Proteins\*.
- 624 61. M. Krijavetska *et al.*, Liprin beta 1, a member of the family of LAR transmembrane tyrosine  
625 phosphatase-interacting proteins, is a new target for the metastasis-associated protein S100A4  
626 (Mts1). *J Biol Chem* **277**, 5229-5235 (2002).
- 627 62. J. W. Tyner *et al.*, Functional genomic landscape of acute myeloid leukaemia. *Nature* **562**, 526-  
628 531 (2018).
- 629 63. C. Curtis *et al.*, The genomic and transcriptomic architecture of 2,000 breast tumours reveals  
630 novel subgroups. *Nature* **486**, 346-352 (2012).
- 631 64. B. Pereira *et al.*, The somatic mutation profiles of 2,433 breast cancers refine their genomic and  
632 transcriptomic landscapes. *Nature communications* **7**, 11479 (2016).
- 633 65. Z. Kan *et al.*, Multi-omics profiling of younger Asian breast cancers reveals distinctive molecular  
634 signatures. *Nature communications* **9**, 1725 (2018).
- 635 66. J. Tan *et al.*, Genomic landscapes of breast fibroepithelial tumors. *Nature genetics* **47**, 1341-1345  
636 (2015).

- 637 67. S. P. Shah *et al.*, The clonal and mutational evolution spectrum of primary triple-negative breast  
638 cancers. *Nature* **486**, 395-399 (2012).
- 639 68. S. Banerji *et al.*, Sequence analysis of mutations and translocations across breast cancer  
640 subtypes. *Nature* **486**, 405-409 (2012).
- 641 69. P. J. Stephens *et al.*, The landscape of cancer genes and mutational processes in breast cancer.  
642 *Nature* **486**, 400-404 (2012).
- 643 70. G. Ciriello *et al.*, Comprehensive Molecular Portraits of Invasive Lobular Breast Cancer. *Cell* **163**,  
644 506-519 (2015).
- 645 71. K. A. Hoadley *et al.*, Cell-of-Origin Patterns Dominate the Molecular Classification of 10,000  
646 Tumors from 33 Types of Cancer. *Cell* **173**, 291-304.e296 (2018).
- 647 72. D. Miao *et al.*, Genomic correlates of response to immune checkpoint therapies in clear cell  
648 renal cell carcinoma. *Science* **359**, 801-806 (2018).
- 649 73. M. Giannakis *et al.*, Genomic Correlates of Immune-Cell Infiltrates in Colorectal Carcinoma. *Cell*  
650 *Rep* **15**, 857-865 (2016).
- 651 74. Y. Song *et al.*, Identification of genomic alterations in oesophageal squamous cell cancer. *Nature*  
652 **509**, 91-95 (2014).
- 653 75. D. C. Lin *et al.*, Genomic and molecular characterization of esophageal squamous cell carcinoma.  
654 *Nature genetics* **46**, 467-473 (2014).
- 655 76. G. Guo *et al.*, Frequent mutations of genes encoding ubiquitin-mediated proteolysis pathway  
656 components in clear cell renal cell carcinoma. *Nature genetics* **44**, 17-19 (2011).
- 657 77. M. Gerlinger *et al.*, Genomic architecture and evolution of clear cell renal cell carcinomas  
658 defined by multiregion sequencing. *Nature genetics* **46**, 225-233 (2014).
- 659 78. J. Chen *et al.*, Genomic landscape of lung adenocarcinoma in East Asians. *Nature genetics* **52**,  
660 177-186 (2020).

- 661 79. S. C. Baca *et al.*, Punctuated evolution of prostate cancer genomes. *Cell* **153**, 666-677 (2013).
- 662 80. A. Kumar *et al.*, Substantial interindividual and limited intraindividual genomic diversity among  
663 tumors from men with metastatic prostate cancer. *Nature medicine* **22**, 369-378 (2016).
- 664 81. P. Jelinic *et al.*, Recurrent SMARCA4 mutations in small cell carcinoma of the ovary. *Nature*  
665 *genetics* **46**, 424-426 (2014).
- 666 82. S. Jones *et al.*, Genomic analyses of gynaecologic carcinosarcomas reveal frequent mutations in  
667 chromatin remodelling genes. *Nature communications* **5**, 5006 (2014).
- 668 83. J. Meyers, J. Mandrekar. (2015).
- 669 84. J. C. Barrett, B. Fry, J. Maller, M. J. Daly, Haploview: analysis and visualization of LD and  
670 haplotype maps. *Bioinformatics* **21**, 263-265 (2005).
- 671 85. G. E. Hoffman, E. E. Schadt, variancePartition: interpreting drivers of variation in complex gene  
672 expression studies. *BMC bioinformatics* **17**, 483 (2016).
- 673 86. C. Fei, L. A. Deroo, D. P. Sandler, C. R. Weinberg, Fertility drugs and young-onset breast cancer:  
674 results from the Two Sister Study. *Journal of the National Cancer Institute* **104**, 1021-1027  
675 (2012).
- 676



**Table 1. Summary representation of data in terms of methodology.**

| Screening method        | SNVs | Haplotypes | Haploblocks | CHR Rol | Rol |
|-------------------------|------|------------|-------------|---------|-----|
| Haplotype (10 kb)       | 762  | 4126       | 762         | ND      | ND  |
| 10 <sup>-4</sup> filter | 415  | 322        | 282         | 64      | ND  |
| 2-6 SNV windows         | 417  | 466        | 165         | 33      | 13* |
| HTR                     | 417  | 466        | 165         | 33      | 33  |
| Permuted p ≤ 0.05       | 64   | 14         | 14          | 14      | 14  |

**Table 1. Sequential application of methods and filters defines a short list of candidates which may associate with breast cancer age-of-onset.** HTR = Haplotype trend regression; SNVs = single nucleotide variants retained at each stage of analysis; Haplotypes = haplotypes retained at each stage of analysis; Haploblocks = haploblocks retained at each stage of analysis; CHR Rol = chromosomal regions defined by the remaining haploblocks; Rol = regions of interest retained after analysis; \* indicates region of interest was evaluated by visual assessment of data representation as opposed to statistical measures. ND = Not determined.

**Table 2. Haplotype trend regression comparing discordant sibs.**

| Candidates |           | Affected |          |         | Unaffected Sibs |       |       |
|------------|-----------|----------|----------|---------|-----------------|-------|-------|
| CHR        | POS       | FM P     | Bon.P    | PermP   | FM P            | Bon.P | PermP |
| 1          | 3605097   | 3.44E-18 | 6.55E-03 | 4.9E-02 | 6.57E-39        | 1     | 1     |
| 2          | 149978783 | 8.19E-21 | 1.21E-05 | 1.0E-03 | 6.85E-40        | 1     | 0.99  |
| 4          | 123066575 | 9.94E-19 | 1.71E-03 | 1.0E-02 | 3.58E-39        | 1     | 1     |
| 4          | 123150286 | 1.18E-20 | 1.53E-05 | 1.0E-03 | 4.47E-40        | 0.36  | 0.86  |
| 4          | 123306223 | 1.34E-19 | 2.01E-04 | 2.0E-03 | 1.45E-39        | 0.11  | 0.59  |
| 4          | 123370387 | 1.82E-19 | 2.77E-04 | 2.0E-03 | 4.98E-41        | 0.051 | 0.45  |
| 6          | 112261385 | 3.65E-18 | 6.47E-03 | 4.7E-02 | 5.79E-39        | 1     | 1     |
| 8          | 1898547   | 2.77E-18 | 5.18E-03 | 3.3E-02 | 5.90E-40        | 0.76  | 0.95  |
| 8          | 141594881 | 7.49E-19 | 1.26E-03 | 5.0E-03 | 6.56E-40        | 0.88  | 0.97  |
| 10         | 101117689 | 2.23E-18 | 3.05E-03 | 1.9E-02 | 1.44E-39        | 1     | 1     |
| 12         | 27698751  | 3.04E-18 | 5.74E-03 | 4.0E-02 | 1.70E-40        | 0.073 | 0.52  |
| 12         | 30957220  | 1.28E-18 | 2.25E-03 | 1.4E-02 | 7.46E-39        | 1     | 1     |
| 13         | 27545444  | 7.29E-19 | 1.23E-03 | 5.0E-03 | 2.91E-39        | 1     | 1     |
| 21         | 18544139  | 2.15E-18 | 3.94E-03 | 2.5E-02 | 2.10E-37        | 1     | 1     |

**Table 2. Haplotype trend regression underscores significant differences between breast cancer patients and unaffected sibs.** Haplotype trend regression was performed using haplotypes as defined in **Table 1**. By way of contrast, regression analysis was performed using age-at-diagnosis as a quantitative trait comparing breast cancer patients to unaffected sibs. CHR = chromosome, POS = position of the first marker, FM P = the p value resulting from full model trend regression, Bon.P = the Bonferroni adjusted p value, and PermP = the permuted p value after 1,000 permutations. The 14 haplotypes all showed a significant association with age-of-onset in breast cancer patients, whereas no significance was observed in discordant sibs. Although not displayed, similar analysis using age-at-diagnosis as a categorical variable yielded similar findings.

**Table 3. Correlating gene expression with age-at-diagnosis.**

| <b>GENE</b>     | <b>T</b> | <b>PR(&gt; T )</b> | <b>F-STAT</b> | <b>P</b> | <b>VARIANCE</b> |
|-----------------|----------|--------------------|---------------|----------|-----------------|
| <b>AGO2</b>     | -3.86    | 1.19E-04           | 14.93         | 1.19E-04 | 1.48%           |
| <b>ARHGEF10</b> | -0.89    | 3.72E-01           | 0.7984        | 3.72E-01 | 0.08%           |
| <b>CNNM1</b>    | 0.056    | 9.56E-01           | 0.0031        | 9.56E-01 | 0.00%           |
| <b>IL2</b>      | 1.32     | 1.88E-01           | 1.733         | 1.88E-01 | 0.17%           |
| <b>KIAA1109</b> | -4.41    | 1.13E-05           | 19.48         | 1.13E-05 | 1.92%           |
| <b>LYPD6B</b>   | 1.41     | 1.59E-01           | 1.99          | 1.59E-01 | 0.20%           |
| <b>PPFIBP1</b>  | -3.28    | 1.07E-03           | 10.77         | 1.07E-03 | 1.07%           |
| <b>TP73</b>     | -0.55    | 5.83E-01           | 0.3013        | 5.83E-01 | 0.03%           |

**Table 3. Expression of AGO2, KIAA1109, and PPFIBP1 correlates with age-at diagnosis in breast cancer patients.** Gene expression data was regressed using the VariancePartition R package. The additive effect of AGO2, KIAA1109, and PPFIBP1 expression contributed to 4.47% of the variance in age across the TCGA breast cancer data set.

**Table 4. Correlating mutation-type with age-at-diagnosis.**

| GROUP    | AMPLIFICATION |       |      |       |       | DEEP DELETION |       |      |       |          | MUTATION |       |      |       |          |
|----------|---------------|-------|------|-------|-------|---------------|-------|------|-------|----------|----------|-------|------|-------|----------|
|          | Mean          | SD    | N    | Z     | P     | Mean          | SD    | N    | Z     | P        | Mean     | SD    | N    | Z     | P        |
| CONTROL  | 60.2          | 13.13 | 7026 | 0.00  | N/A   | 60.2          | 13.13 | 7026 | 0     | N/A      | 60.2     | 13.13 | 7026 | 0.00  | N/A      |
| ADAD1    | 58.3          | 12.65 | 22   | 1.13  | 0.26  | 64.4          | 10.06 | 26   | -2.83 | 4.70E-03 | 61.5     | 13.27 | 99   | -1.04 | 2.97E-01 |
| AGO2     | 60.3          | 12.53 | 910  | -0.10 | 0.92  | 64.6          | 11.20 | 11   | -2.30 | 2.17E-02 | 64.6     | 13.04 | 131  | -3.83 | 1.28E-04 |
| ARHGEF10 | 63.0          | 10.86 | 54   | -2.20 | 0.029 | 61.9          | 11.46 | 298  | -1.80 | 7.14E-02 | 65.2     | 12.59 | 131  | -4.40 | 1.10E-05 |
| CNNM1    | 54.2          | 11.61 | 8    | 2.90  | 0.004 | 66.1          | 10.42 | 23   | -3.86 | 1.14E-04 | 64.2     | 12.44 | 87   | -3.20 | 1.37E-03 |
| IL2      | 57.6          | 12.54 | 21   | 1.53  | 0.127 | 64.4          | 10.06 | 26   | -2.83 | 4.70E-03 | 60.9     | 13.05 | 23   | -0.39 | 7.00E-01 |
| KIAA1109 | 58.9          | 12.33 | 23   | 0.80  | 0.43  | 64.6          | 9.57  | 27   | -3.05 | 2.33E-03 | 63.4     | 12.74 | 400  | -3.55 | 3.82E-04 |
| LYPD6B   | 57.5          | 13.39 | 21   | 2.01  | 0.044 | 64.8          | 10.36 | 35   | -3.32 | 9.16E-04 | 64.1     | 12.53 | 35   | -2.53 | 1.14E-02 |
| PPFIBP1  | 60.2          | 13.20 | 171  | 0.00  | 1     | 59.3          | 12.98 | 7    | 0.42  | 6.71E-01 | 63.2     | 13.74 | 94   | -2.35 | 1.86E-02 |
| TP73     | 62.9          | 10.38 | 42   | -2.30 | 0.021 | 62.           | 12.61 | 33   | -1.63 | 1.02E-01 | 62.9     | 13.43 | 89   | -2.09 | 3.70E-02 |

**Table 4. CNNM1 and LYPD6B exhibit bidirectionality of effect on age-at-diagnosis depending upon mutation type.** Two-sample Z testing was applied to compare gene-specific mutation types with the control population. Gene amplifications in CNNM1 and LYPD6B correlated with a lower age-at-diagnosis whereas deletions or truncating mutations correlated with an increased age-at-diagnosis.

## FIGURE LEGENDS

**Figure 1. Manhattan plot.** Haplotype-based analysis was performed using a fixed window size of 10 kb and an expectation-maximization (EM) algorithm with a maximum of 50 iterations. P values were derived from  $\chi^2$ . A Manhattan plot was constructed by plotting  $-\log[p]$  against chromosomal position. The horizontal blue line corresponds to a suggestive threshold of  $p \leq 5 \times 10^{-5}$ . The horizontal red line corresponds to the conventional threshold for genome-wide significance at  $p \leq 5 \times 10^{-8}$ .

**Figure 2. Fine mapping of targeted chromosomal regions.** Haplotype analysis was performed using an EM algorithm with a maximum of 50 iterations and sliding windows consisting of 2-6 SNPs. Haplotype windows were aligned and graphically depicted using the GrASP excel macro. Individual haploblocks are color-coded to represent p values (dark green  $p > 5 \times 10^{-5}$ ; light green  $p \leq 5 \times 10^{-5}$ ; yellow  $p \leq 5 \times 10^{-6}$ ; orange  $p \leq 5 \times 10^{-7}$ ; red  $p \leq 5 \times 10^{-8}$ ).

**Figure 3. Odds ratios associated with candidate haplotypes.** EM frequencies were used to calculate odds ratios and 95% confidence intervals comparing frequencies between younger and older populations within *The Two Sister Study*.

**Figure 4. Comparison of haplotype frequencies in The Two Sister Study and phase III of the 1000 Genomes Project.** Bar graphs present the ratios formed by dividing *The Two Sister Study* haplotype frequency with population-specific haplotype frequencies obtained through the 1000 Genomes Project. AFR = African, AMR = American, EAS = East Asian, EUR = non-Finnish European.

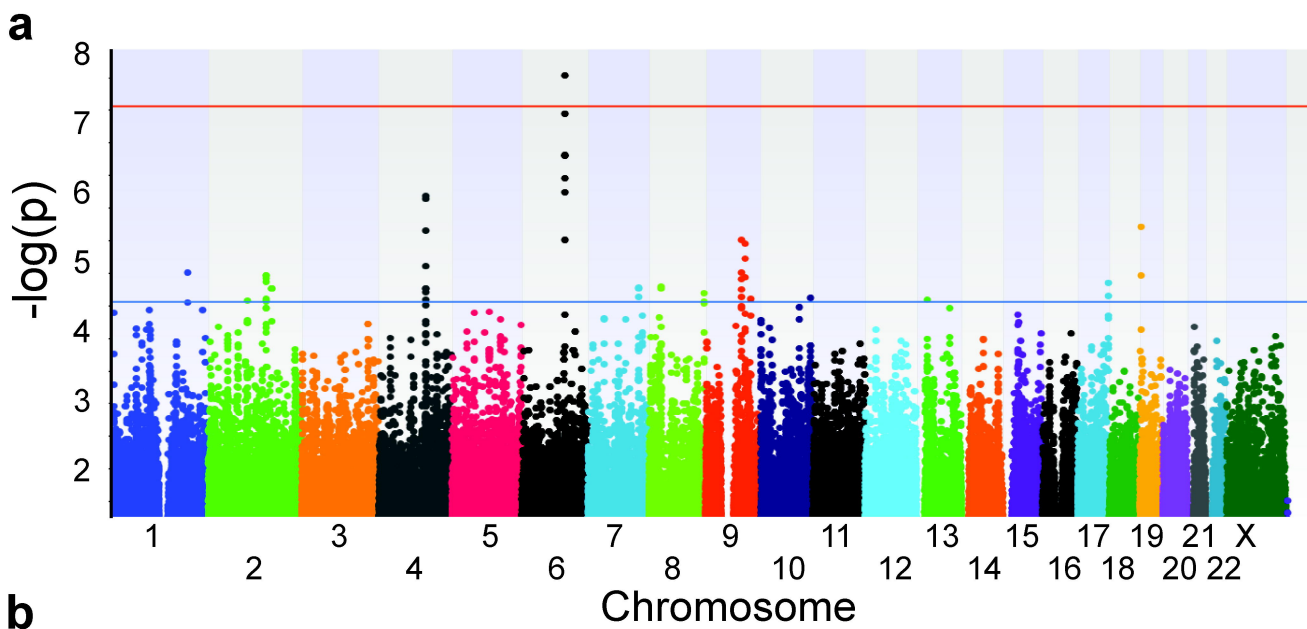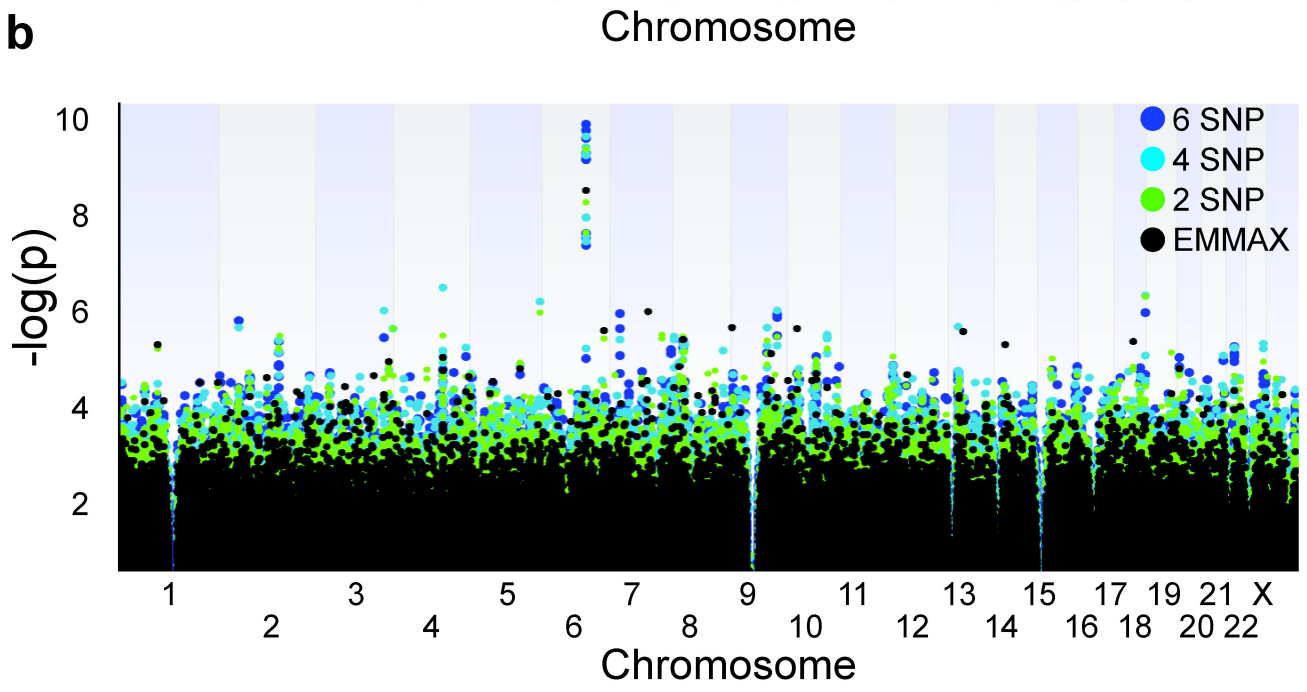

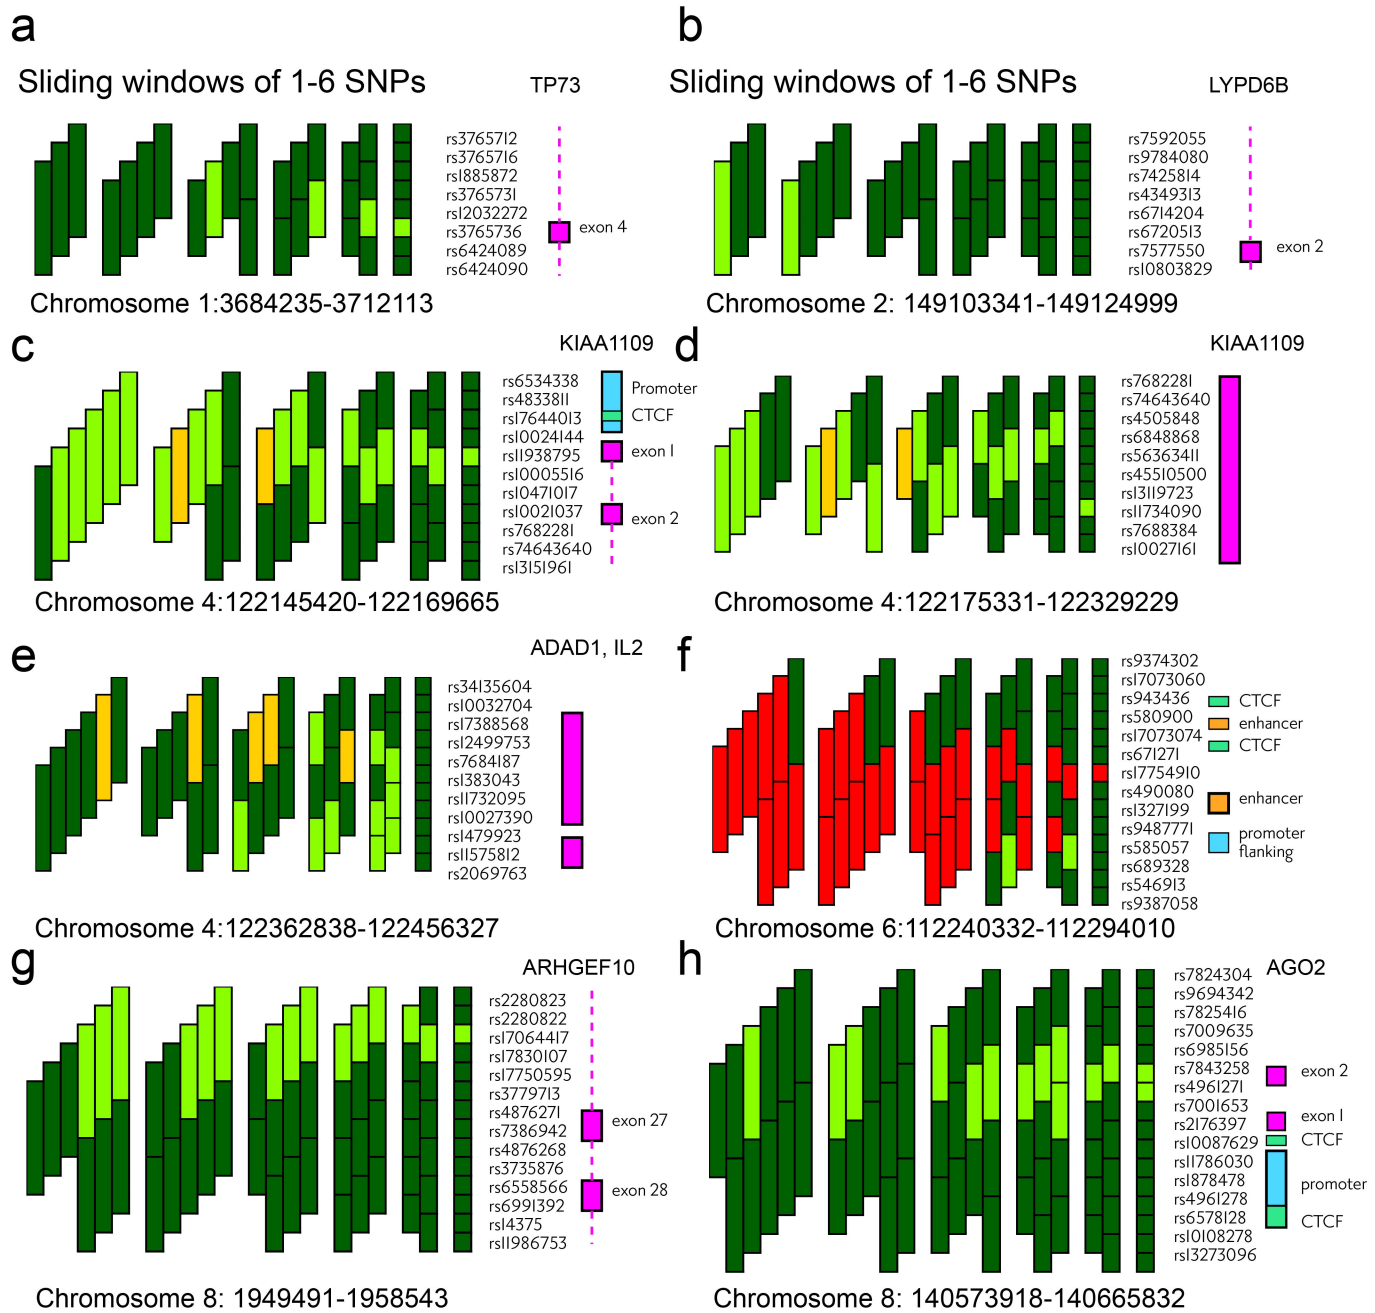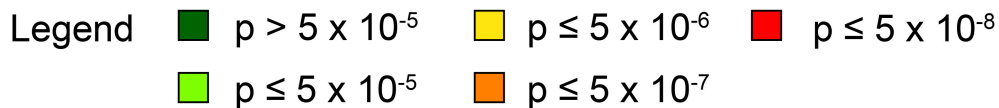

**i** Sliding windows of 1-6 SNPs

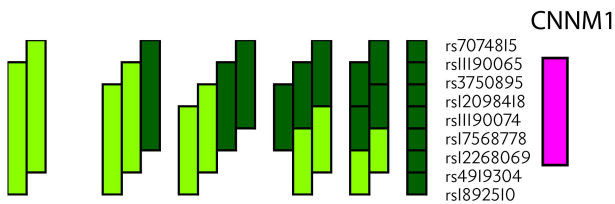

Chromosome 10:99350066-99370406

**j** Sliding windows of 1-6 SNPs

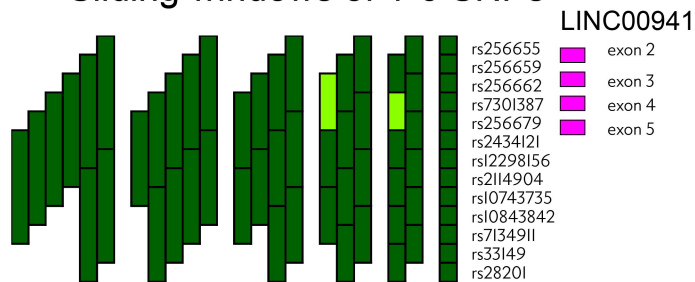

Chromosome 12:30796577-30825434

**k** PPFIBP1

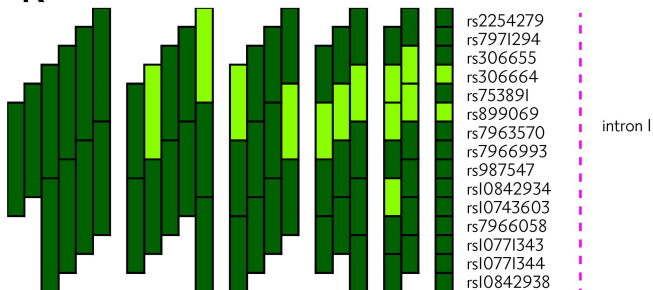

Chromosome 12:27524884-27570343

**l** AL160035.1

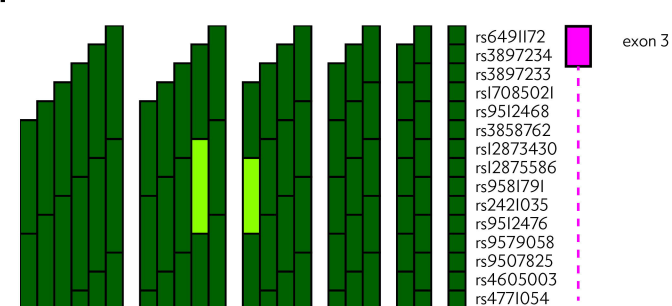

Chromosome 13: 26965827-26988205

**m** NEK4P1

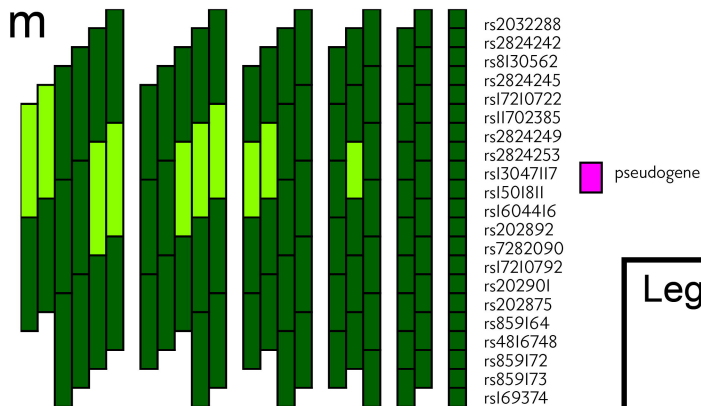

Chromosome 21:17121260-17259859

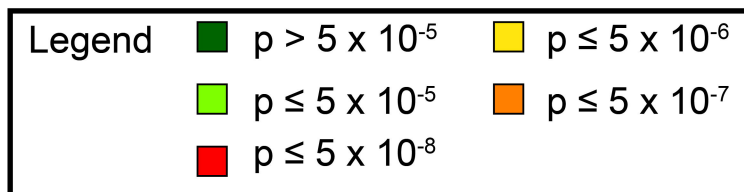



| GENE        | CHR:POS               | Odds Ratio, 95% CI             |
|-------------|-----------------------|--------------------------------|
| TP73        | 1:3688533-3700037     | OR = 0.71, 95% CI = 0.61-0.83  |
| LYPD6B      | 2:149116355-149124999 | OR = 6.95, 95% CI = 2.47-19.51 |
| KIAA1109    | 4:122145420-122169665 | OR = 1.45, 95% CI = 1.24-1.7   |
| KIAA coding | 4:122229131-122297158 | OR = 1.5, 95% CI = 1.28-1.76   |
| ADAD1       | 4:122385068-122412022 | OR = 0.68, 95% CI = 0.58-0.8   |
| IL2         | 4:122449232-122473886 | OR = 0.69, 95% CI = 0.58-0.81  |
| Chr 6       | 6:111940182-111964664 | OR = 2.03, 95% CI = 1.62-2.54  |
| ARHGEF10    | 8:1950381-1953764     | OR = 0.34, 95% CI = 0.21-0.55  |
| AGO2        | 8:140584782-140610939 | OR = 1.55, 95% CI = 1.27-1.88  |
| CNNM1       | 10:99357932-99368605  | OR = 0.51, 95% CI = 0.38-0.69  |
| LINC00941   | 12:27545818-27554420  | OR = 1.42, 95% CI = 1.21-1.66  |
| PPFIBP1     | 12:30804286-30809469  | OR = 1.41, 95% CI = 1.21-1.65  |
| AL160035.1  | 13:26971307-26979157  | OR = 0.73, 95% CI = 0.63-0.85  |
| NEK4P1      | 21:17171821-17206922  | OR = 0.66, 95% CI = 0.54-0.79  |

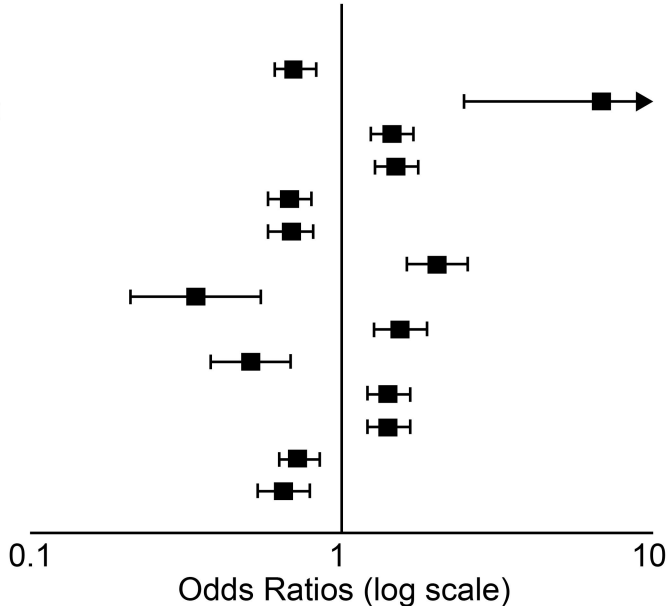

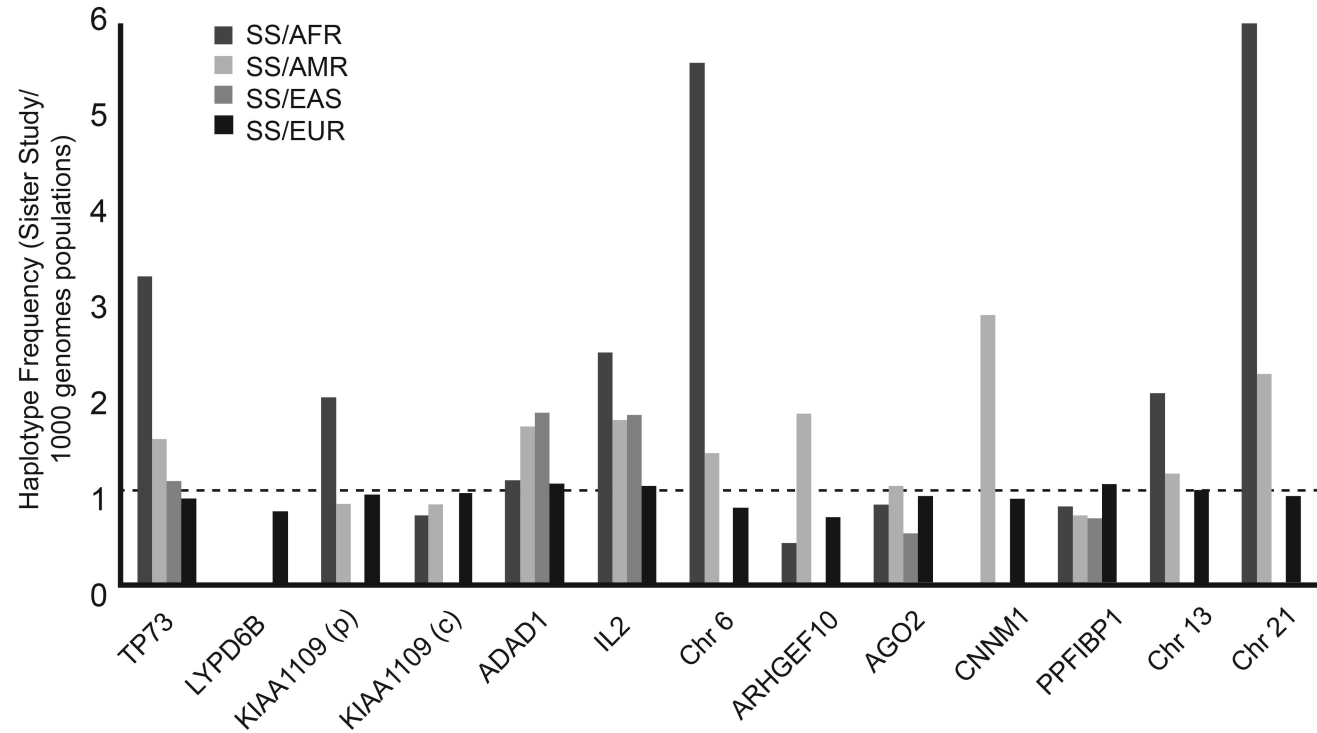

Source: https://medrxiv.org/content/10.1101/2020.12.04.20244251v2.full.pdf
