# Supplementary material for: Retrospective analysis of The Two Sister Study using haplotype-based association testing to identify loci associated with early-onset breast cancer
Source: bioRxiv or medRxiv preprint supplement (doi:10.1101/2020.12.04.20244251), 2020-12-28

**Retrospective analysis of *The Two Sister Study* using haplotype-based association tests to identify loci associated with early-onset breast cancer**

James R. Gilbert, Ph.D.<sup>1</sup>, James J. Cray, Ph.D.<sup>2</sup>, Joseph E. Losee, M.D.<sup>1</sup>, Gregory M. Cooper, Ph.D.<sup>1,3,4</sup>.

1. Department of Plastic Surgery, University of Pittsburgh/Children's Hospital of Pittsburgh, Pittsburgh, PA 15201.
2. Division of Anatomy, The Ohio State University College of Medicine, Columbus, OH 43210.
3. Department of Oral Biology, University of Pittsburgh/Children's Hospital of Pittsburgh, Pittsburgh, PA 15201.
4. Department of Bioengineering, University of Pittsburgh/Children's Hospital of Pittsburgh, Pittsburgh, PA 15201.

*Email addresses:*

James.Gilbert2@chp.edu  
James.Cray@osumc.edu  
joseph.Losee@chp.edu  
Greg.Cooper@chp.edu

*Running Title:*

*Funding:* The work described within this study was funded through the Children's Fund of Children's Hospital of Pittsburgh of UPMC and through the Ross H. Musgrave Endowment (J.E.L).

*Conflicts of Interest:* There are no conflicts of interest to disclose.

*Corresponding Author:*

Dr. Gregory M. Cooper  
Department of Plastic Surgery  
3533 Rangos Research Building  
530 45th St, Pittsburgh, PA 15201  
412/692-5384 (office)  
[greg.cooper@chp.edu](mailto:greg.cooper@chp.edu)

*Keywords:* young-onset; early-onset; cancer; familial; breast cancer

## SUPPLEMENTAL INFORMATION

### SUPPLEMENTAL FIGURE LEGENDS

**Figure S1. LOESS curve based upon age-at-diagnosis in *The Two Sister Study* breast cancer population.** The optimal cutoff for distinguishing between younger and older patients affected by breast cancer is calculated to be 45 years-of-age at the time of diagnosis. Martingale residuals plotted against age-at-diagnosis suggest that age-at-diagnosis is a discontinuous variable. The assumption of linearity is not fulfilled.

**Figure S2. Quantile-quantile plot.** An initial haplotype-based analysis was performed using a static 10 kb window to identify regions of interest. A QQ plot was constructed by plotting  $-\log[\text{observed } p]$  versus  $-\log[\text{expected } p]$ . The dashed line depicts an ideal line with a slope of 1. Note that individual data points closely follow the theoretical ideal with a slight tail becoming evident at the outermost extremes of the plot.

**Figure S3. Haplomaps representing candidate regions identified by haplotype trend regression with full scan permuted p values  $\leq 0.05$ .** Images include chromosomal position using GRCh38 coordinates. Affected genes are defined beneath each haplomap and solid black lines represent non-coding introns. Coding exons and their relative position within the displayed haplomap are represented by solid black blocks. No gene is associated with the block displayed in **Fig S3g** or **Fig S3n**.

## FIGURES

Figure S1. Statistical testing warrants dichotomization of *The Two Sister Study* breast cancer population by age-at-diagnosis.

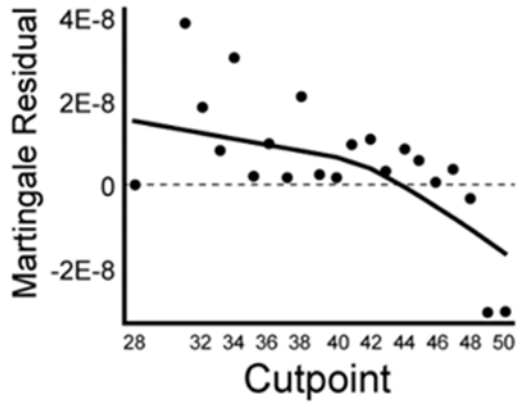

Figure S2. Using age-at-diagnosis to dichotomize breast cancer patients yields normally distributed data.

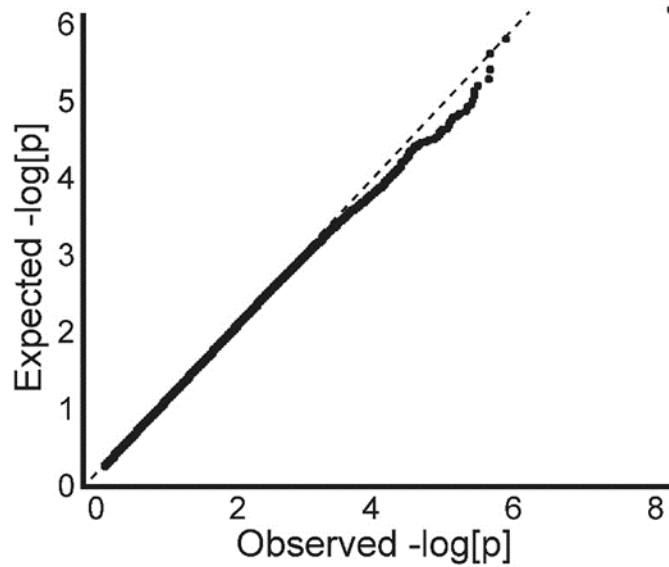

**Figure S3. Mapping of the most significant haploblocks defined by haplotype trend regression provides supporting evidence of underlying haplotype structure within candidate regions.**

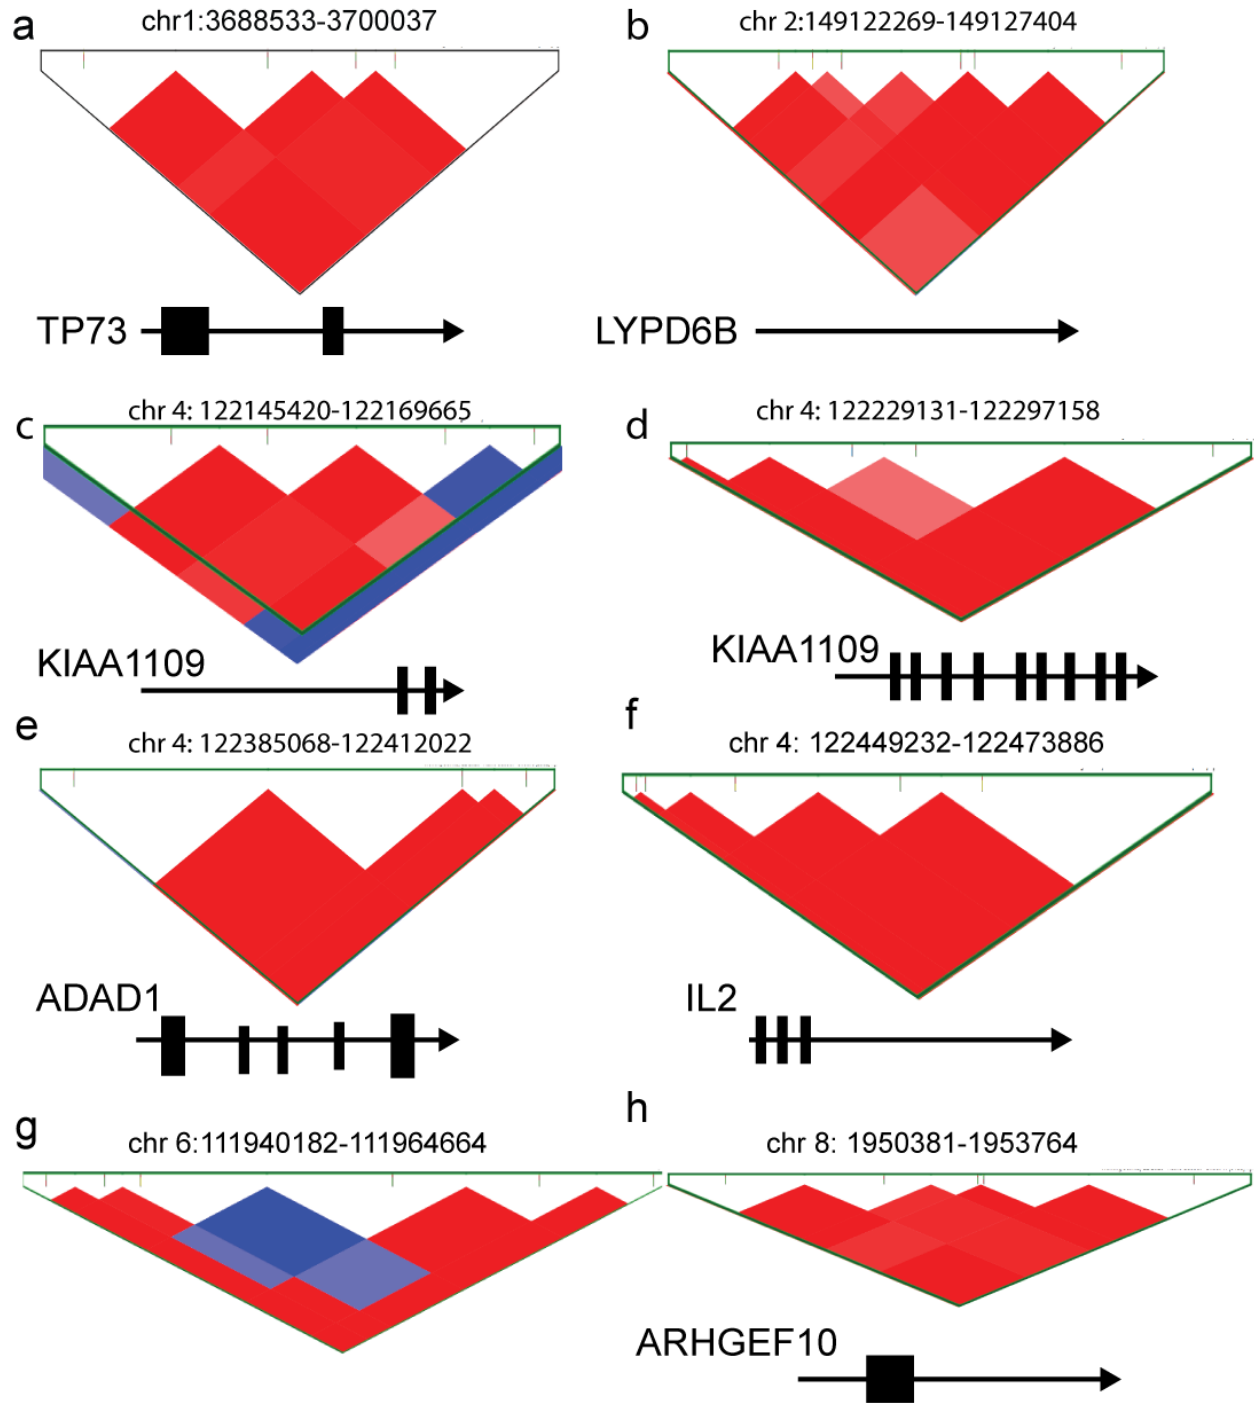

Figure S3, continued.

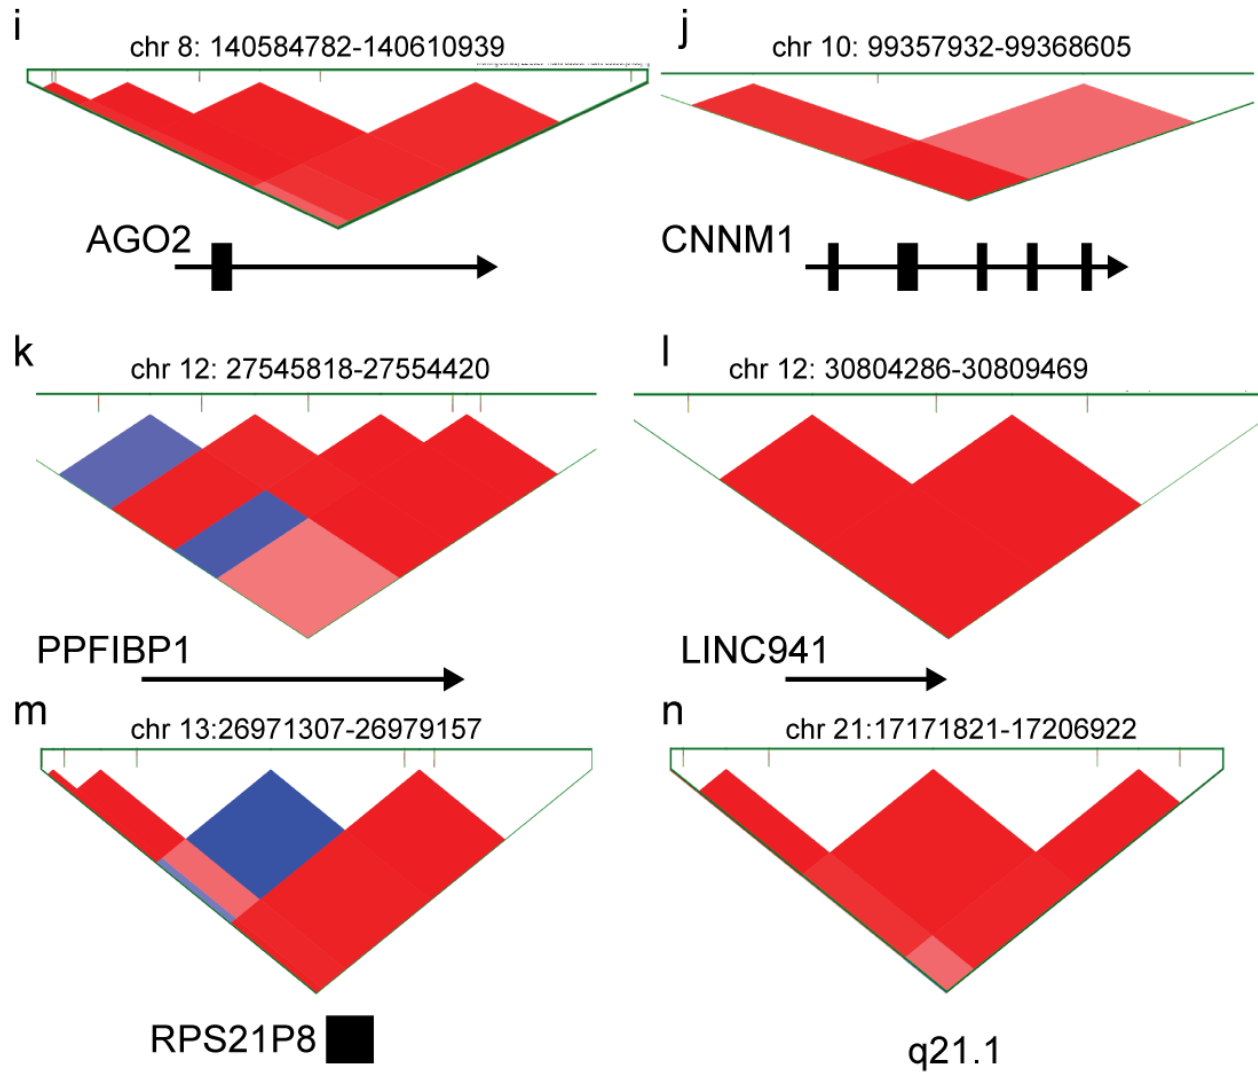

Supplement: Supplementary file [file media-5.pdf]
