# Supplementary material for: Retrospective analysis of The Two Sister Study using haplotype-based association testing to identify loci associated with early-onset breast cancer
Source: bioRxiv or medRxiv preprint supplement (doi:10.1101/2020.12.04.20244251), 2020-12-28
Supplement: Supplementary file [file media-3.pdf]

**Supplemental Table S2. Filtered to exclude isolated haploblocks.**

| First Marker | CHR | POS       | Block | Markers Used                                                       | Haplotype | EM Freq  | Cases    | Controls | P        |
|--------------|-----|-----------|-------|--------------------------------------------------------------------|-----------|----------|----------|----------|----------|
| rs1885872    | 1   | 3688533   | 57    | rs1885872, rs3765731, rs12032272, rs3765736                        | AGGA      | 3.42E-01 | 3.03E-01 | 3.82E-01 | 1.36E-05 |
| rs3765731    | 1   | 3695328   | 58    | rs3765731, rs12032272, rs3765736                                   | GGA       | 3.46E-01 | 3.09E-01 | 3.85E-01 | 2.39E-05 |
| rs12032272   | 1   | 3698592   | 59    | rs12032272, rs3765736                                              | GA        | 3.51E-01 | 3.15E-01 | 3.88E-01 | 2.92E-05 |
| rs12144282   | 1   | 62236069  | 162   | rs12144282, rs6688986                                              | AA        | 6.63E-01 | 6.99E-01 | 6.27E-01 | 3.16E-05 |
| rs12144282   | 1   | 62236069  | 162   | rs12144282, rs6688986, rs1050334                                   | AAA       | 6.63E-01 | 6.99E-01 | 6.27E-01 | 3.16E-05 |
| rs6688986    | 1   | 62237048  | 163   | rs6688986, rs1050334                                               | AA        | 6.64E-01 | 7.00E-01 | 6.27E-01 | 2.99E-05 |
| rs2781130    | 1   | 94764958  | 340   | rs2781130, rs7525706, rs3860336, rs17414905, rs2391423, rs6541369  | GAAGGA    | 1.17E-02 | 1.97E-02 | 3.47E-03 | 4.83E-05 |
| rs7525706    | 1   | 94770363  | 341   | rs7525706, rs3860336, rs17414905, rs2391423, rs6541369             | AAGGA     | 1.20E-02 | 2.04E-02 | 3.47E-03 | 2.74E-05 |
| rs7525706    | 1   | 94770363  | 341   | rs7525706, rs3860336, rs17414905, rs2391423, rs6541369, rs4847214  | AAGGAG    | 1.20E-02 | 2.04E-02 | 3.47E-03 | 2.74E-05 |
| rs3860336    | 1   | 94770726  | 342   | rs3860336, rs17414905, rs2391423, rs6541369                        | AGGA      | 1.20E-02 | 2.04E-02 | 3.47E-03 | 2.74E-05 |
| rs3860336    | 1   | 94770726  | 342   | rs3860336, rs17414905, rs2391423, rs6541369, rs4847214             | AGGAG     | 1.20E-02 | 2.04E-02 | 3.47E-03 | 2.74E-05 |
| rs3860336    | 1   | 94770726  | 342   | rs3860336, rs17414905, rs2391423, rs6541369, rs4847214, rs12743267 | AGGAGG    | 1.20E-02 | 2.04E-02 | 3.46E-03 | 2.81E-05 |
| rs7425814    | 2   | 149116355 | 574   | rs7425814, rs4349313, rs6714204, rs6720513, rs7577550, rs10803829  | AAGCGG    | 1.13E-02 | 1.95E-02 | 2.87E-03 | 1.97E-05 |
| rs4349313    | 2   | 149118982 | 575   | rs4349313, rs6714204, rs6720513, rs7577550, rs10803829             | AGCGG     | 1.21E-02 | 2.05E-02 | 3.62E-03 | 3.10E-05 |
| rs4349313    | 2   | 149118982 | 575   | rs4349313, rs6714204, rs6720513, rs7577550, rs10803829, rs12621827 | AGCGGG    | 1.17E-02 | 2.04E-02 | 2.92E-03 | 1.17E-05 |
| rs6714204    | 2   | 149122269 | 576   | rs6714204, rs6720513, rs7577550, rs10803829, rs12621827            | GCGGG     | 1.18E-02 | 2.01E-02 | 3.37E-03 | 2.88E-05 |
| rs6714204    | 2   | 149122269 | 576   | rs6714204, rs6720513, rs7577550, rs10803829, rs12621827, rs1026889 | GCGGGA    | 1.16E-02 | 2.03E-02 | 2.78E-03 | 1.02E-05 |
| rs6720513    | 2   | 149122777 | 577   | rs6720513, rs7577550, rs10803829, rs12621827, rs1026889            | CGGGA     | 1.15E-02 | 1.96E-02 | 3.15E-03 | 2.84E-05 |

|            |   |           |     |                                                                           |        |          |          |          |          |
|------------|---|-----------|-----|---------------------------------------------------------------------------|--------|----------|----------|----------|----------|
| rs6720513  | 2 | 149122777 | 577 | rs6720513, rs7577550, rs10803829,<br>rs12621827, rs1026889, rs17432490    | CGGGAG | 1.13E-02 | 1.98E-02 | 2.68E-03 | 1.14E-05 |
| rs16828069 | 2 | 150332543 | 622 | rs16828069, rs10177059,<br>rs10180142, rs983231, rs12994436               | GGCAA  | 1.23E-01 | 9.76E-02 | 1.49E-01 | 2.24E-05 |
| rs16828069 | 2 | 150332543 | 622 | rs16828069, rs10177059,<br>rs10180142, rs983231, rs12994436,<br>rs6760903 | GGCAAA | 1.23E-01 | 9.77E-02 | 1.49E-01 | 2.50E-05 |
| rs10177059 | 2 | 150344535 | 623 | rs10177059, rs10180142, rs983231,<br>rs12994436                           | GCAA   | 1.24E-01 | 9.80E-02 | 1.50E-01 | 2.15E-05 |
| rs10177059 | 2 | 150344535 | 623 | rs10177059, rs10180142, rs983231,<br>rs12994436, rs6760903                | GCAAA  | 1.24E-01 | 9.80E-02 | 1.50E-01 | 2.41E-05 |
| rs10177059 | 2 | 150344535 | 623 | rs10177059, rs10180142, rs983231,<br>rs12994436, rs6760903, rs7600018     | GCAAAA | 1.24E-01 | 9.80E-02 | 1.50E-01 | 2.41E-05 |
| rs10180142 | 2 | 150345320 | 624 | rs10180142, rs983231, rs12994436                                          | CAA    | 1.23E-01 | 9.78E-02 | 1.50E-01 | 2.16E-05 |
| rs10180142 | 2 | 150345320 | 624 | rs10180142, rs983231, rs12994436,<br>rs6760903                            | CAAA   | 1.23E-01 | 9.79E-02 | 1.50E-01 | 2.42E-05 |
| rs10180142 | 2 | 150345320 | 624 | rs10180142, rs983231, rs12994436,<br>rs6760903, rs7600018                 | CAAAA  | 1.23E-01 | 9.79E-02 | 1.50E-01 | 2.50E-05 |
| rs10180142 | 2 | 150345320 | 624 | rs10180142, rs983231, rs12994436,<br>rs6760903, rs7600018, rs10930090     | CAAAAG | 1.24E-01 | 9.79E-02 | 1.50E-01 | 2.41E-05 |
| rs983231   | 2 | 150349292 | 625 | rs983231, rs12994436                                                      | AA     | 1.23E-01 | 9.78E-02 | 1.49E-01 | 2.23E-05 |
| rs983231   | 2 | 150349292 | 625 | rs983231, rs12994436, rs6760903                                           | AAA    | 1.23E-01 | 9.78E-02 | 1.50E-01 | 2.49E-05 |
| rs983231   | 2 | 150349292 | 625 | rs983231, rs12994436, rs6760903,<br>rs7600018                             | AGGA   | 7.56E-01 | 7.88E-01 | 7.23E-01 | 2.31E-05 |
| rs983231   | 2 | 150349292 | 625 | rs983231, rs12994436, rs6760903,<br>rs7600018                             | AAAA   | 1.23E-01 | 9.77E-02 | 1.49E-01 | 2.77E-05 |
| rs983231   | 2 | 150349292 | 625 | rs983231, rs12994436, rs6760903,<br>rs7600018, rs10930090                 | AAAAG  | 1.24E-01 | 9.79E-02 | 1.50E-01 | 2.41E-05 |
| rs983231   | 2 | 150349292 | 625 | rs983231, rs12994436, rs6760903,<br>rs7600018, rs10930090, rs17434648     | AAAAGA | 1.24E-01 | 9.80E-02 | 1.50E-01 | 2.41E-05 |
| rs12994436 | 2 | 150354384 | 626 | rs12994436, rs6760903                                                     | AA     | 1.24E-01 | 9.80E-02 | 1.50E-01 | 2.41E-05 |
| rs12994436 | 2 | 150354384 | 626 | rs12994436, rs6760903                                                     | GG     | 8.71E-01 | 8.95E-01 | 8.46E-01 | 2.41E-05 |
| rs12994436 | 2 | 150354384 | 626 | rs12994436, rs6760903, rs7600018                                          | GGA    | 8.23E-01 | 8.52E-01 | 7.94E-01 | 2.48E-05 |
| rs12994436 | 2 | 150354384 | 626 | rs12994436, rs6760903, rs7600018<br>rs12994436, rs6760903, rs7600018,     | AAA    | 1.23E-01 | 9.75E-02 | 1.48E-01 | 3.16E-05 |
| rs12994436 | 2 | 150354384 | 626 | rs10930090                                                                | AAAG   | 1.24E-01 | 9.80E-02 | 1.50E-01 | 2.41E-05 |
| rs12994436 | 2 | 150354384 | 626 | rs12994436, rs6760903, rs7600018,<br>rs10930090, rs17434648               | AAAGA  | 1.24E-01 | 9.80E-02 | 1.50E-01 | 2.41E-05 |

|            |   |           |     |                                                                                 |        |          |          |          |          |
|------------|---|-----------|-----|---------------------------------------------------------------------------------|--------|----------|----------|----------|----------|
| rs12994436 | 2 | 150354384 | 626 | rs12994436, rs6760903, rs7600018, rs10930090, rs17434648, rs1866979             | AAAGAG | 1.23E-01 | 9.72E-02 | 1.50E-01 | 1.88E-05 |
| rs6760903  | 2 | 150361519 | 627 | rs6760903, rs7600018, rs10930090, rs17434648, rs1866979, rs7590701              | AAGAGA | 1.22E-01 | 9.59E-02 | 1.48E-01 | 2.10E-05 |
| rs7600018  | 2 | 150362262 | 628 | rs7600018, rs10930090, rs17434648, rs1866979, rs7590701                         | AGAGA  | 1.22E-01 | 9.76E-02 | 1.48E-01 | 3.74E-05 |
| rs7600018  | 2 | 150362262 | 628 | rs7600018, rs10930090, rs17434648, rs1866979, rs7590701, rs4287765              | AGAGAC | 1.23E-01 | 9.76E-02 | 1.48E-01 | 4.12E-05 |
| rs10930090 | 2 | 150362575 | 629 | rs10930090, rs17434648, rs1866979, rs10930090, rs17434648, rs1866979, rs7590701 | GAG    | 1.83E-01 | 1.54E-01 | 2.13E-01 | 3.88E-05 |
| rs10930090 | 2 | 150362575 | 629 | rs10930090, rs17434648, rs1866979, rs7590701, rs4287765                         | GAGA   | 1.66E-01 | 1.37E-01 | 1.96E-01 | 1.83E-05 |
| rs10930090 | 2 | 150362575 | 629 | rs10930090, rs17434648, rs1866979, rs7590701, rs4287765                         | GAGAC  | 1.67E-01 | 1.37E-01 | 1.97E-01 | 2.11E-05 |
| rs10930090 | 2 | 150362575 | 629 | rs10930090, rs17434648, rs1866979, rs7590701, rs4287765, rs10187222             | GAGACA | 1.67E-01 | 1.37E-01 | 1.97E-01 | 2.31E-05 |
| rs17434648 | 2 | 150367344 | 630 | rs17434648, rs1866979, rs7590701, rs17434648, rs1866979, rs7590701, rs4287765   | AGA    | 1.75E-01 | 1.45E-01 | 2.04E-01 | 2.91E-05 |
| rs17434648 | 2 | 150367344 | 630 | rs17434648, rs1866979, rs7590701, rs4287765, rs10187222                         | AGAC   | 1.75E-01 | 1.46E-01 | 2.05E-01 | 2.99E-05 |
| rs17434648 | 2 | 150367344 | 630 | rs17434648, rs1866979, rs7590701, rs4287765, rs10187222                         | AGACA  | 1.75E-01 | 1.46E-01 | 2.05E-01 | 2.99E-05 |
| rs17434648 | 2 | 150367344 | 630 | rs17434648, rs1866979, rs7590701, rs4287765, rs10187222, rs11684751             | AGACAA | 1.75E-01 | 1.46E-01 | 2.05E-01 | 3.30E-05 |
| rs1866979  | 2 | 150370850 | 631 | rs1866979, rs7590701                                                            | GA     | 1.75E-01 | 1.46E-01 | 2.05E-01 | 3.48E-05 |
| rs1866979  | 2 | 150370850 | 631 | rs1866979, rs7590701, rs4287765, rs1866979, rs7590701, rs4287765, rs10187222    | GAC    | 1.75E-01 | 1.46E-01 | 2.05E-01 | 3.61E-05 |
| rs1866979  | 2 | 150370850 | 631 | rs1866979, rs7590701, rs4287765, rs10187222, rs11684751                         | GACA   | 1.75E-01 | 1.46E-01 | 2.05E-01 | 3.61E-05 |
| rs1866979  | 2 | 150370850 | 631 | rs1866979, rs7590701, rs4287765, rs10187222, rs11684751, rs976396               | GACAA  | 1.75E-01 | 1.46E-01 | 2.05E-01 | 3.94E-05 |
| rs1866979  | 2 | 150370850 | 631 | rs1866979, rs7590701, rs4287765, rs10187222, rs11684751, rs976396               | GACAAA | 1.75E-01 | 1.46E-01 | 2.05E-01 | 3.94E-05 |
| rs7590701  | 2 | 150381362 | 632 | rs7590701, rs4287765                                                            | AC     | 1.75E-01 | 1.46E-01 | 2.05E-01 | 3.48E-05 |
| rs7590701  | 2 | 150381362 | 632 | rs7590701, rs4287765, rs10187222, rs7590701, rs4287765, rs10187222, rs11684751  | ACA    | 1.75E-01 | 1.46E-01 | 2.05E-01 | 3.48E-05 |
| rs7590701  | 2 | 150381362 | 632 | rs7590701, rs4287765, rs10187222, rs11684751, rs976396                          | ACAA   | 1.75E-01 | 1.46E-01 | 2.05E-01 | 3.48E-05 |
| rs7590701  | 2 | 150381362 | 632 | rs7590701, rs4287765, rs10187222, rs11684751, rs976396                          | ACAAA  | 1.75E-01 | 1.46E-01 | 2.05E-01 | 3.48E-05 |

|            |   |           |      |                                                                         |        |          |          |          |          |
|------------|---|-----------|------|-------------------------------------------------------------------------|--------|----------|----------|----------|----------|
| rs16824126 | 2 | 227889633 | 695  | rs16824126, exm272588, rs7566347, rs16824173, rs2946931, rs11680252     | AAGGCA | 3.71E-01 | 4.06E-01 | 3.36E-01 | 3.73E-05 |
| rs1715828  | 2 | 227893838 | 696  | exm272588, rs7566347, rs16824173, rs2946931, rs11680252                 | AGGCA  | 3.74E-01 | 4.10E-01 | 3.36E-01 | 3.63E-05 |
| rs1715828  | 2 | 227893838 | 696  | exm272588, rs7566347, rs16824173, rs2946931, rs11680252, exm-rs10191097 | AGGCAA | 3.75E-01 | 4.12E-01 | 3.38E-01 | 4.15E-05 |
| rs7566347  | 2 | 227894838 | 697  | rs7566347, rs16824173, rs2946931, rs11680252                            | GGCA   | 3.74E-01 | 4.10E-01 | 3.37E-01 | 3.85E-05 |
| rs7566347  | 2 | 227894838 | 697  | rs7566347, rs16824173, rs2946931, rs11680252, exm-rs10191097            | GGCAA  | 3.74E-01 | 4.11E-01 | 3.37E-01 | 3.20E-05 |
| rs7566347  | 2 | 227894838 | 697  | rs7566347, rs16824173, rs2946931, rs11680252, exm-rs10191097, rs3748863 | GGCAAG | 3.73E-01 | 4.09E-01 | 3.36E-01 | 4.45E-05 |
| rs6534338  | 4 | 122105714 | 1535 | rs6534338, rs4833811, rs17644013, rs10024144, rs11938795, rs10005516    | GAAGGG | 2.61E-01 | 2.29E-01 | 2.94E-01 | 4.34E-05 |
| rs4833811  | 4 | 122106568 | 1536 | rs4833811, rs17644013, rs10024144, rs11938795                           | AAGG   | 2.66E-01 | 2.32E-01 | 3.00E-01 | 2.80E-05 |
| rs4833811  | 4 | 122106568 | 1536 | rs4833811, rs17644013, rs10024144, rs11938795, rs10005516               | AAGGG  | 2.66E-01 | 2.32E-01 | 3.00E-01 | 2.10E-05 |
| rs4833811  | 4 | 122106568 | 1536 | rs4833811, rs17644013, rs10024144, rs11938795, rs10005516, rs10471017   | AAGGGA | 2.66E-01 | 2.32E-01 | 3.01E-01 | 2.56E-05 |
| rs17644013 | 4 | 122128482 | 1537 | rs17644013, rs10024144, rs11938795                                      | AGG    | 2.67E-01 | 2.32E-01 | 3.02E-01 | 2.14E-05 |
| rs17644013 | 4 | 122128482 | 1537 | rs17644013, rs10024144, rs11938795, rs10005516                          | AGGG   | 2.66E-01 | 2.32E-01 | 3.01E-01 | 1.46E-05 |
| rs17644013 | 4 | 122128482 | 1537 | rs17644013, rs10024144, rs11938795, rs10005516, rs10471017              | AGGGA  | 2.67E-01 | 2.33E-01 | 3.02E-01 | 1.80E-05 |
| rs17644013 | 4 | 122128482 | 1537 | rs17644013, rs10024144, rs11938795, rs10005516, rs10471017, rs10021037  | AGGGAG | 2.67E-01 | 2.33E-01 | 3.02E-01 | 1.80E-05 |
| rs10024144 | 4 | 122145420 | 1538 | rs10024144, rs11938795                                                  | GA     | 6.87E-01 | 7.26E-01 | 6.48E-01 | 6.65E-06 |
| rs10024144 | 4 | 122145420 | 1538 | rs10024144, rs11938795                                                  | GG     | 2.68E-01 | 2.33E-01 | 3.02E-01 | 2.55E-05 |
| rs10024144 | 4 | 122145420 | 1538 | rs10024144, rs11938795, rs10005516                                      | GAG    | 6.85E-01 | 7.24E-01 | 6.44E-01 | 5.62E-06 |
| rs10024144 | 4 | 122145420 | 1538 | rs10024144, rs11938795, rs10005516                                      | GGG    | 2.67E-01 | 2.33E-01 | 3.02E-01 | 2.16E-05 |
| rs10024144 | 4 | 122145420 | 1538 | rs10024144, rs11938795, rs10005516, rs10471017                          | GAGA   | 6.82E-01 | 7.20E-01 | 6.43E-01 | 4.46E-06 |

|            |   |           |      |                                                                       |        |          |          |          |          |
|------------|---|-----------|------|-----------------------------------------------------------------------|--------|----------|----------|----------|----------|
| rs10024144 | 4 | 122145420 | 1538 | rs10024144, rs11938795, rs10005516, rs10471017                        | GGGA   | 2.67E-01 | 2.33E-01 | 3.02E-01 | 2.97E-05 |
| rs10024144 | 4 | 122145420 | 1538 | rs10024144, rs11938795, rs10005516, rs10471017, rs10021037            | GAGAG  | 6.82E-01 | 7.20E-01 | 6.43E-01 | 4.46E-06 |
| rs10024144 | 4 | 122145420 | 1538 | rs10024144, rs11938795, rs10005516, rs10471017, rs10021037            | GGGAG  | 2.67E-01 | 2.33E-01 | 3.02E-01 | 2.96E-05 |
| rs10024144 | 4 | 122145420 | 1538 | rs10024144, rs11938795, rs10005516, rs10471017, rs10021037, rs7682281 | GGGAGA | 2.68E-01 | 2.34E-01 | 3.03E-01 | 2.93E-05 |
| rs11938795 | 4 | 122151854 | 1539 | rs11938795, rs10005516                                                | AG     | 6.99E-01 | 7.37E-01 | 6.60E-01 | 5.62E-06 |
| rs11938795 | 4 | 122151854 | 1539 | rs11938795, rs10005516                                                | GG     | 2.68E-01 | 2.34E-01 | 3.04E-01 | 2.19E-05 |
| rs11938795 | 4 | 122151854 | 1539 | rs11938795, rs10005516, rs10471017                                    | AGA    | 6.83E-01 | 7.21E-01 | 6.43E-01 | 5.51E-06 |
| rs11938795 | 4 | 122151854 | 1539 | rs11938795, rs10005516, rs10471017                                    | GGA    | 2.68E-01 | 2.34E-01 | 3.03E-01 | 2.24E-05 |
| rs11938795 | 4 | 122151854 | 1539 | rs11938795, rs10005516, rs10471017, rs10021037                        | AGAG   | 6.83E-01 | 7.21E-01 | 6.43E-01 | 5.52E-06 |
| rs11938795 | 4 | 122151854 | 1539 | rs11938795, rs10005516, rs10471017, rs10021037                        | GGAG   | 2.68E-01 | 2.34E-01 | 3.03E-01 | 2.24E-05 |
| rs11938795 | 4 | 122151854 | 1539 | rs11938795, rs10005516, rs10471017, rs10021037, rs7682281             | GGAGA  | 2.68E-01 | 2.34E-01 | 3.04E-01 | 2.19E-05 |
| rs11938795 | 4 | 122151854 | 1539 | rs11938795, rs10005516, rs10471017, rs10021037, rs7682281, rs74643640 | GGAGAA | 2.69E-01 | 2.34E-01 | 3.04E-01 | 2.28E-05 |
| rs6848868  | 4 | 122229131 | 1549 | rs6848868, rs6848868, rs56363411, rs45510500, rs13119723              | AATGA  | 6.98E-01 | 7.40E-01 | 6.55E-01 | 5.73E-07 |
| rs6848868  | 4 | 122229131 | 1549 | rs6848868, rs6848868, rs56363411, rs45510500, rs13119723, rs11734090  | AATGAA | 6.60E-01 | 6.98E-01 | 6.20E-01 | 8.48E-06 |
| rs6848868  | 4 | 122229131 | 1550 | rs6848868, rs56363411, rs45510500, rs13119723                         | ATGA   | 6.98E-01 | 7.40E-01 | 6.55E-01 | 5.74E-07 |
| rs6848868  | 4 | 122229131 | 1550 | rs6848868, rs56363411, rs45510500, rs13119723, rs11734090             | ATGAA  | 6.60E-01 | 6.98E-01 | 6.20E-01 | 8.47E-06 |
| rs56363411 | 4 | 122250504 | 1551 | rs56363411, rs45510500, rs13119723, rs11734090                        | TGAA   | 6.60E-01 | 6.98E-01 | 6.20E-01 | 8.50E-06 |
| rs45510500 | 4 | 122258745 | 1552 | rs45510500, rs13119723, rs11734090                                    | GAA    | 6.89E-01 | 7.27E-01 | 6.50E-01 | 6.54E-06 |
| rs13119723 | 4 | 122297158 | 1553 | rs13119723, rs11734090                                                | AA     | 7.30E-01 | 7.65E-01 | 6.93E-01 | 1.28E-05 |
| rs11734090 | 4 | 122306958 | 1554 | rs11734090, rs7688384                                                 | GG     | 2.70E-01 | 2.35E-01 | 3.07E-01 | 1.28E-05 |

|            |   |           |      |                                                                      |        |          |          |          |          |
|------------|---|-----------|------|----------------------------------------------------------------------|--------|----------|----------|----------|----------|
| rs11734090 | 4 | 122306958 | 1554 | rs11734090, rs7688384, rs10027161                                    | GGA    | 2.70E-01 | 2.35E-01 | 3.07E-01 | 1.28E-05 |
| rs11734090 | 4 | 122306958 | 1554 | rs11734090, rs7688384, rs10027161, rs2306369                         | GGAA   | 2.70E-01 | 2.34E-01 | 3.06E-01 | 1.11E-05 |
| rs11734090 | 4 | 122306958 | 1554 | rs11734090, rs7688384, rs10027161, rs2306369, rs2306369              | GGAAA  | 2.70E-01 | 2.34E-01 | 3.06E-01 | 1.11E-05 |
| rs11734090 | 4 | 122306958 | 1554 | rs11734090, rs7688384, rs10027161, rs2306369, rs2306369, rs1127348   | GGAAAA | 2.69E-01 | 2.34E-01 | 3.06E-01 | 1.26E-05 |
| rs10032704 | 4 | 122385068 | 1562 | rs10032704, rs17388568, rs17388568, rs12499753                       | AGGA   | 2.96E-01 | 2.57E-01 | 3.35E-01 | 3.44E-06 |
| rs10032704 | 4 | 122385068 | 1562 | rs10032704, rs17388568, rs17388568, rs12499753, rs7684187            | AGGAG  | 2.91E-01 | 2.53E-01 | 3.29E-01 | 4.71E-06 |
| rs10032704 | 4 | 122385068 | 1562 | rs10032704, rs17388568, rs17388568, rs12499753, rs7684187, rs1383043 | AGGAGG | 2.91E-01 | 2.53E-01 | 3.29E-01 | 4.69E-06 |
| rs17388568 | 4 | 122408207 | 1563 | rs17388568, rs17388568, rs12499753, rs7684187                        | GGAG   | 2.91E-01 | 2.53E-01 | 3.29E-01 | 5.42E-06 |
| rs17388568 | 4 | 122408207 | 1563 | rs17388568, rs17388568, rs12499753, rs7684187, rs1383043             | GGAGG  | 2.91E-01 | 2.53E-01 | 3.29E-01 | 4.74E-06 |
| rs17388568 | 4 | 122408207 | 1564 | rs17388568, rs12499753, rs7684187                                    | GAG    | 2.91E-01 | 2.53E-01 | 3.29E-01 | 5.42E-06 |
| rs17388568 | 4 | 122408207 | 1564 | rs17388568, rs12499753, rs7684187, rs1383043                         | GAGG   | 2.91E-01 | 2.53E-01 | 3.29E-01 | 4.74E-06 |
| rs12499753 | 4 | 122412022 | 1565 | rs12499753, rs7684187                                                | AG     | 2.91E-01 | 2.53E-01 | 3.29E-01 | 5.75E-06 |
| rs12499753 | 4 | 122412022 | 1565 | rs12499753, rs7684187, rs1383043                                     | AGG    | 2.91E-01 | 2.53E-01 | 3.29E-01 | 4.74E-06 |
| rs7684187  | 4 | 122420004 | 1566 | rs7684187, rs1383043                                                 | GG     | 2.91E-01 | 2.53E-01 | 3.29E-01 | 5.75E-06 |
| rs11732095 | 4 | 122427190 | 1568 | rs11732095, rs10027390                                               | AA     | 7.10E-01 | 7.48E-01 | 6.72E-01 | 6.86E-06 |
| rs10027390 | 4 | 122447361 | 1569 | rs10027390, rs1479923                                                | GG     | 2.90E-01 | 2.52E-01 | 3.28E-01 | 6.86E-06 |
| rs10027390 | 4 | 122447361 | 1569 | rs10027390, rs1479923, rs11575812                                    | GGG    | 2.87E-01 | 2.50E-01 | 3.26E-01 | 5.66E-06 |
| rs10027390 | 4 | 122447361 | 1569 | rs10027390, rs1479923, rs11575812, rs2069763                         | GGGC   | 2.87E-01 | 2.50E-01 | 3.26E-01 | 5.67E-06 |
| rs10027390 | 4 | 122447361 | 1569 | rs10027390, rs1479923, rs11575812, rs2069763, rs10857092             | GGGCG  | 2.87E-01 | 2.50E-01 | 3.26E-01 | 5.35E-06 |
| rs10027390 | 4 | 122447361 | 1569 | rs10027390, rs1479923, rs11575812, rs2069763, rs10857092, rs6848139  | GGGCGA | 2.87E-01 | 2.49E-01 | 3.26E-01 | 4.61E-06 |
| rs57119445 | 4 | 122449232 | 1570 | rs1479923, rs11575812                                                | GG     | 2.87E-01 | 2.50E-01 | 3.26E-01 | 5.43E-06 |
| rs57119445 | 4 | 122449232 | 1570 | rs1479923, rs11575812, rs2069763                                     | GGC    | 2.87E-01 | 2.50E-01 | 3.26E-01 | 5.43E-06 |
| rs57119445 | 4 | 122449232 | 1570 | rs1479923, rs11575812, rs2069763, rs10857092                         | GGCG   | 2.87E-01 | 2.50E-01 | 3.26E-01 | 5.13E-06 |

|            |   |           |      |                                                                                 |        |          |          |          |          |
|------------|---|-----------|------|---------------------------------------------------------------------------------|--------|----------|----------|----------|----------|
| rs57119445 | 4 | 122449232 | 1570 | rs1479923, rs11575812, rs2069763, rs10857092, rs6848139                         | GGCGA  | 2.87E-01 | 2.49E-01 | 3.26E-01 | 4.44E-06 |
| rs11575812 | 4 | 122449894 | 1571 | rs11575812, rs2069763                                                           | GC     | 2.87E-01 | 2.50E-01 | 3.26E-01 | 5.43E-06 |
| rs11575812 | 4 | 122449894 | 1571 | rs11575812, rs2069763, rs10857092, rs11575812, rs2069763, rs10857092, rs6848139 | GCG    | 2.87E-01 | 2.50E-01 | 3.26E-01 | 5.13E-06 |
| rs11575812 | 4 | 122449894 | 1571 | rs6848139                                                                       | GCGA   | 2.87E-01 | 2.49E-01 | 3.26E-01 | 4.45E-06 |
| rs11738463 | 5 | 126344047 | 2047 | rs11738463, rs7730928, rs10068159, rs10057227, rs12513492                       | GAAAG  | 8.98E-02 | 1.12E-01 | 6.76E-02 | 3.09E-05 |
| rs11738463 | 5 | 126344047 | 2047 | rs11738463, rs7730928, rs10068159, rs10057227, rs12513492, rs10478724           | GAAAGG | 8.98E-02 | 1.12E-01 | 6.75E-02 | 2.96E-05 |
| rs7730928  | 5 | 126345196 | 2048 | rs7730928, rs10068159, rs10057227, rs12513492                                   | AAAG   | 8.98E-02 | 1.12E-01 | 6.77E-02 | 3.18E-05 |
| rs7730928  | 5 | 126345196 | 2048 | rs7730928, rs10068159, rs10057227, rs12513492, rs10478724                       | AAAGG  | 8.98E-02 | 1.12E-01 | 6.75E-02 | 2.27E-05 |
| rs7730928  | 5 | 126345196 | 2048 | rs7730928, rs10068159, rs10057227, rs12513492, rs10478724, rs7727523            | AAAGGG | 8.99E-02 | 1.12E-01 | 6.75E-02 | 2.32E-05 |
| rs10068159 | 5 | 126348266 | 2049 | rs10068159, rs10057227, rs12513492                                              | AAG    | 9.07E-02 | 1.13E-01 | 6.84E-02 | 3.04E-05 |
| rs10068159 | 5 | 126348266 | 2049 | rs10068159, rs10057227, rs12513492, rs10478724                                  | AAGG   | 9.06E-02 | 1.12E-01 | 6.83E-02 | 3.20E-05 |
| rs10068159 | 5 | 126348266 | 2049 | rs10068159, rs10057227, rs12513492, rs10478724, rs7727523                       | AAGGG  | 9.06E-02 | 1.12E-01 | 6.86E-02 | 4.01E-05 |
| rs10057227 | 5 | 126349682 | 2050 | rs10057227, rs12513492                                                          | AG     | 9.12E-02 | 1.14E-01 | 6.85E-02 | 2.51E-05 |
| rs10057227 | 5 | 126349682 | 2050 | rs10057227, rs12513492, rs10478724                                              | AGG    | 9.04E-02 | 1.12E-01 | 6.82E-02 | 3.14E-05 |
| rs10057227 | 5 | 126349682 | 2050 | rs10057227, rs12513492, rs10478724, rs7727523                                   | AGGG   | 9.08E-02 | 1.13E-01 | 6.85E-02 | 3.33E-05 |
| rs10057227 | 5 | 126349682 | 2050 | rs10057227, rs12513492, rs10478724, rs7727523, rs1549189                        | AGGGA  | 9.03E-02 | 1.12E-01 | 6.85E-02 | 4.99E-05 |
| rs12513492 | 5 | 126350206 | 2051 | rs12513492, rs10478724                                                          | GG     | 9.12E-02 | 1.14E-01 | 6.86E-02 | 2.50E-05 |
| rs12513492 | 5 | 126350206 | 2051 | rs12513492, rs10478724, rs7727523                                               | GGG    | 9.13E-02 | 1.14E-01 | 6.87E-02 | 2.56E-05 |
| rs12513492 | 5 | 126350206 | 2051 | rs12513492, rs10478724, rs7727523, rs1549189                                    | GGGA   | 9.09E-02 | 1.13E-01 | 6.85E-02 | 3.08E-05 |
| rs12513492 | 5 | 126350206 | 2051 | rs12513492, rs10478724, rs7727523, rs1549189, rs10519907                        | GGGAG  | 9.06E-02 | 1.12E-01 | 6.86E-02 | 3.89E-05 |
| rs12513492 | 5 | 126350206 | 2051 | rs12513492, rs10478724, rs7727523, rs1549189, rs10519907, rs10519908            | GGGAGA | 9.06E-02 | 1.12E-01 | 6.86E-02 | 3.81E-05 |

|            |   |           |      |                                                                      |        |          |          |          |          |
|------------|---|-----------|------|----------------------------------------------------------------------|--------|----------|----------|----------|----------|
| rs10478724 | 5 | 126350217 | 2052 | rs10478724, rs7727523, rs1549189, rs10519907, rs10519908, rs7733479  | GGAGAA | 9.06E-02 | 1.14E-01 | 6.65E-02 | 8.15E-06 |
| rs7727523  | 5 | 126350689 | 2053 | rs7727523, rs1549189, rs10519907, rs10519908, rs7733479              | GAGAA  | 9.02E-02 | 1.13E-01 | 6.64E-02 | 8.92E-06 |
| rs10519907 | 5 | 126357690 | 2055 | rs10519907, rs10519908, rs7733479, rs7700582                         | GAAC   | 6.68E-02 | 8.62E-02 | 4.70E-02 | 2.29E-05 |
| rs10519907 | 5 | 126357690 | 2055 | rs10519907, rs10519908, rs7733479, rs7700582, rs17595984             | GAACG  | 6.68E-02 | 8.64E-02 | 4.69E-02 | 2.04E-05 |
| rs10519907 | 5 | 126357690 | 2055 | rs10519907, rs10519908, rs7733479, rs7700582, rs17595984, rs10519910 | GAACGG | 6.50E-02 | 8.48E-02 | 4.49E-02 | 1.78E-05 |
| rs10519908 | 5 | 126358504 | 2056 | rs10519908, rs7733479, rs7700582                                     | AAC    | 6.72E-02 | 8.64E-02 | 4.77E-02 | 3.05E-05 |
| rs10519908 | 5 | 126358504 | 2056 | rs10519908, rs7733479, rs7700582, rs17595984                         | AACG   | 6.74E-02 | 8.68E-02 | 4.77E-02 | 2.73E-05 |
| rs10519908 | 5 | 126358504 | 2056 | rs10519908, rs7733479, rs7700582, rs17595984, rs10519910             | AACGG  | 6.56E-02 | 8.50E-02 | 4.59E-02 | 2.57E-05 |
| rs7733479  | 5 | 126360998 | 2057 | rs7733479, rs7700582                                                 | AC     | 6.80E-02 | 8.78E-02 | 4.79E-02 | 1.90E-05 |
| rs7733479  | 5 | 126360998 | 2057 | rs7733479, rs7700582, rs17595984                                     | ACG    | 6.78E-02 | 8.76E-02 | 4.78E-02 | 1.89E-05 |
| rs7733479  | 5 | 126360998 | 2057 | rs7733479, rs7700582, rs17595984, rs10519910                         | ACGG   | 6.58E-02 | 8.53E-02 | 4.60E-02 | 1.90E-05 |
| rs1545751  | 5 | 178553791 | 2326 | rs1545751, rs262012, rs34594012, rs262037                            | ACGG   | 3.68E-02 | 5.10E-02 | 2.23E-02 | 3.46E-05 |
| rs1545751  | 5 | 178553791 | 2326 | rs1545751, rs262012, rs34594012, rs262037, rs185493                  | ACGGA  | 3.67E-02 | 5.12E-02 | 2.19E-02 | 2.50E-05 |
| rs1545751  | 5 | 178553791 | 2326 | rs1545751, rs262012, rs34594012, rs262037, rs185493, rs625820        | ACGGAC | 3.52E-02 | 5.04E-02 | 1.97E-02 | 6.61E-06 |
| rs262012   | 5 | 178555012 | 2327 | rs262012, rs34594012, rs262037, rs185493, rs625820                   | CGGAC  | 5.95E-02 | 7.86E-02 | 4.00E-02 | 1.13E-05 |
| rs262012   | 5 | 178555012 | 2327 | rs262012, rs34594012, rs262037, rs185493, rs625820, rs262066         | CGGACG | 4.27E-02 | 5.94E-02 | 2.57E-02 | 6.35E-06 |
| rs34594012 | 5 | 178560739 | 2328 | rs34594012, rs262037, rs185493, rs625820                             | GGAC   | 6.08E-02 | 7.97E-02 | 4.15E-02 | 1.73E-05 |
| rs34594012 | 5 | 178560739 | 2328 | rs34594012, rs262037, rs185493, rs625820, rs262066                   | GGACG  | 4.30E-02 | 5.94E-02 | 2.62E-02 | 9.25E-06 |
| rs262037   | 5 | 178563885 | 2329 | rs262037, rs185493, rs625820                                         | GAC    | 8.05E-02 | 1.03E-01 | 5.78E-02 | 8.33E-06 |
| rs262037   | 5 | 178563885 | 2329 | rs262037, rs185493, rs625820, rs262066                               | GACG   | 6.33E-02 | 8.33E-02 | 4.29E-02 | 6.71E-06 |
| rs11963612 | 6 | 111775142 | 2607 | rs11963612, rs9384805, rs2148709                                     | GAG    | 3.25E-01 | 3.60E-01 | 2.89E-01 | 2.82E-05 |



|            |   |           |      |                                                                    |        |          |          |          |          |
|------------|---|-----------|------|--------------------------------------------------------------------|--------|----------|----------|----------|----------|
| rs11963612 | 6 | 111775142 | 2607 | rs11963612, rs9384805, rs2148709, rs2148709                        | GAGG   | 3.25E-01 | 3.60E-01 | 2.89E-01 | 2.82E-05 |
| rs11963612 | 6 | 111775142 | 2607 | rs11963612, rs9384805, rs2148709, rs2148709, rs7761230             | GAGGG  | 3.25E-01 | 3.60E-01 | 2.88E-01 | 3.04E-05 |
| rs11963612 | 6 | 111775142 | 2607 | rs11963612, rs9384805, rs2148709, rs2148709, rs7761230, rs17072912 | GAGGGG | 3.24E-01 | 3.60E-01 | 2.88E-01 | 3.59E-05 |
| rs9384805  | 6 | 111780522 | 2608 | rs9384805, rs2148709                                               | AG     | 3.28E-01 | 3.63E-01 | 2.92E-01 | 3.13E-05 |
| rs9384805  | 6 | 111780522 | 2608 | rs9384805, rs2148709, rs2148709                                    | AGG    | 3.28E-01 | 3.63E-01 | 2.92E-01 | 3.13E-05 |
| rs9384805  | 6 | 111780522 | 2608 | rs9384805, rs2148709, rs2148709, rs7761230                         | AGGG   | 3.28E-01 | 3.63E-01 | 2.92E-01 | 3.15E-05 |
| rs9384805  | 6 | 111780522 | 2608 | rs9384805, rs2148709, rs2148709, rs7761230, rs17072912             | AGGGG  | 3.28E-01 | 3.63E-01 | 2.92E-01 | 2.93E-05 |
| rs9384805  | 6 | 111780522 | 2608 | rs9384805, rs2148709, rs2148709, rs7761230, rs17072912, rs1022650  | AGGGGC | 3.28E-01 | 3.63E-01 | 2.92E-01 | 2.96E-05 |
| rs17073060 | 6 | 111920678 | 2632 | rs17073060, rs943436, rs580900, rs17073074, rs671271, rs17754910   | AAAGGA | 1.37E-01 | 1.76E-01 | 9.79E-02 | 6.97E-10 |
| rs943436   | 6 | 111920951 | 2633 | rs943436, rs580900, rs17073074, rs671271, rs17754910               | AAGGA  | 1.38E-01 | 1.77E-01 | 9.82E-02 | 6.20E-10 |
| rs943436   | 6 | 111920951 | 2633 | rs943436, rs580900, rs17073074, rs671271, rs17754910, rs490080     | AAGGAC | 1.38E-01 | 1.77E-01 | 9.80E-02 | 7.82E-10 |
| rs580900   | 6 | 111936275 | 2634 | rs580900, rs17073074, rs671271, rs17754910                         | AGGA   | 1.38E-01 | 1.77E-01 | 9.82E-02 | 6.65E-10 |
| rs580900   | 6 | 111936275 | 2634 | rs580900, rs17073074, rs671271, rs17754910, rs490080               | AGGAC  | 1.38E-01 | 1.77E-01 | 9.81E-02 | 6.89E-10 |
| rs580900   | 6 | 111936275 | 2634 | rs580900, rs17073074, rs671271, rs17754910, rs490080, rs1327199    | AGGACG | 1.37E-01 | 1.76E-01 | 9.80E-02 | 8.52E-10 |
| rs17073074 | 6 | 111938273 | 2635 | rs17073074, rs671271, rs17754910                                   | GGA    | 1.38E-01 | 1.77E-01 | 9.84E-02 | 6.53E-10 |
| rs17073074 | 6 | 111938273 | 2635 | rs17073074, rs671271, rs17754910, rs490080                         | GGAC   | 1.38E-01 | 1.77E-01 | 9.84E-02 | 6.83E-10 |
| rs17073074 | 6 | 111938273 | 2635 | rs17073074, rs671271, rs17754910, rs490080, rs1327199              | GGACG  | 1.37E-01 | 1.76E-01 | 9.80E-02 | 7.91E-10 |
| rs17073074 | 6 | 111938273 | 2635 | rs17073074, rs671271, rs17754910, rs490080, rs1327199, rs9487771   | GGACGA | 1.37E-01 | 1.75E-01 | 9.73E-02 | 6.87E-10 |
| rs671271   | 6 | 111940182 | 2636 | rs671271, rs17754910                                               | GA     | 1.38E-01 | 1.77E-01 | 9.84E-02 | 6.45E-10 |
| rs671271   | 6 | 111940182 | 2636 | rs671271, rs17754910, rs490080                                     | GAC    | 1.38E-01 | 1.77E-01 | 9.84E-02 | 6.47E-10 |
| rs671271   | 6 | 111940182 | 2636 | rs671271, rs17754910, rs490080, rs1327199                          | GACG   | 1.37E-01 | 1.76E-01 | 9.79E-02 | 6.36E-10 |

|            |   |           |      |                                                                                                          |        |          |          |          |          |
|------------|---|-----------|------|----------------------------------------------------------------------------------------------------------|--------|----------|----------|----------|----------|
| rs671271   | 6 | 111940182 | 2636 | rs671271, rs17754910, rs490080, rs1327199, rs9487771                                                     | GACGA  | 1.37E-01 | 1.75E-01 | 9.72E-02 | 5.47E-10 |
| rs671271   | 6 | 111940182 | 2636 | rs671271, rs17754910, rs490080, rs1327199, rs9487771, rs585057                                           | GACGAA | 1.34E-01 | 1.73E-01 | 9.42E-02 | 2.73E-10 |
| rs17754910 | 6 | 111942528 | 2637 | rs17754910, rs490080                                                                                     | AC     | 1.38E-01 | 1.77E-01 | 9.83E-02 | 6.93E-10 |
| rs17754910 | 6 | 111942528 | 2637 | rs17754910, rs490080                                                                                     | GC     | 8.39E-01 | 8.00E-01 | 8.78E-01 | 9.38E-09 |
| rs17754910 | 6 | 111942528 | 2637 | rs17754910, rs490080, rs1327199                                                                          | ACG    | 1.37E-01 | 1.75E-01 | 9.75E-02 | 8.68E-10 |
| rs17754910 | 6 | 111942528 | 2637 | rs17754910, rs490080, rs1327199, rs17754910, rs490080, rs1327199, rs9487771                              | GCG    | 8.19E-01 | 7.78E-01 | 8.61E-01 | 8.55E-09 |
| rs17754910 | 6 | 111942528 | 2637 | rs17754910, rs490080, rs1327199, rs9487771, rs585057                                                     | ACGA   | 1.36E-01 | 1.75E-01 | 9.62E-02 | 5.97E-10 |
| rs17754910 | 6 | 111942528 | 2637 | rs17754910, rs490080, rs1327199, rs9487771, rs585057, rs689328                                           | ACGAA  | 1.34E-01 | 1.73E-01 | 9.41E-02 | 3.50E-10 |
| rs17754910 | 6 | 111942528 | 2637 | rs17754910, rs490080, rs1327199, rs9487771, rs585057, rs689328, rs490080, rs1327199, rs9487771, rs585057 | ACGAAG | 1.34E-01 | 1.73E-01 | 9.41E-02 | 3.34E-10 |
| rs490080   | 6 | 111944006 | 2638 | rs490080, rs1327199, rs9487771, rs585057, rs689328                                                       | CGAA   | 2.08E-01 | 2.51E-01 | 1.63E-01 | 3.96E-09 |
| rs490080   | 6 | 111944006 | 2638 | rs490080, rs1327199, rs9487771, rs585057, rs689328, rs546913                                             | CGAAG  | 2.07E-01 | 2.50E-01 | 1.62E-01 | 3.85E-09 |
| rs490080   | 6 | 111944006 | 2638 | rs490080, rs1327199, rs9487771, rs585057, rs689328, rs546913                                             | CGAAGG | 2.07E-01 | 2.50E-01 | 1.62E-01 | 3.58E-09 |
| rs1327199  | 6 | 111954157 | 2639 | rs1327199, rs9487771, rs585057, rs1327199, rs9487771, rs585057, rs689328                                 | GAA    | 2.30E-01 | 2.73E-01 | 1.86E-01 | 2.65E-08 |
| rs1327199  | 6 | 111954157 | 2639 | rs1327199, rs9487771, rs585057, rs689328, rs546913                                                       | GAAG   | 2.07E-01 | 2.51E-01 | 1.63E-01 | 5.57E-09 |
| rs1327199  | 6 | 111954157 | 2639 | rs1327199, rs9487771, rs585057, rs689328, rs546913, rs9387058                                            | GAAGG  | 2.07E-01 | 2.51E-01 | 1.63E-01 | 5.30E-09 |
| rs1327199  | 6 | 111954157 | 2639 | rs1327199, rs9487771, rs585057, rs689328, rs546913, rs9387058                                            | GAAGGG | 2.06E-01 | 2.49E-01 | 1.61E-01 | 4.38E-09 |
| rs9487771  | 6 | 111960074 | 2640 | rs9487771, rs585057                                                                                      | AA     | 2.30E-01 | 2.73E-01 | 1.86E-01 | 2.60E-08 |
| rs9487771  | 6 | 111960074 | 2640 | rs9487771, rs585057, rs689328, rs9487771, rs585057, rs689328, rs546913                                   | AAG    | 2.07E-01 | 2.49E-01 | 1.63E-01 | 1.00E-08 |
| rs9487771  | 6 | 111960074 | 2640 | rs9487771, rs585057, rs689328, rs546913, rs9387058                                                       | AAGG   | 2.07E-01 | 2.49E-01 | 1.63E-01 | 1.00E-08 |
| rs9487771  | 6 | 111960074 | 2640 | rs9487771, rs585057, rs689328, rs546913, rs9387058, rs689328, rs546913, rs9387058                        | AAGGG  | 2.05E-01 | 2.49E-01 | 1.61E-01 | 4.64E-09 |
| rs9487771  | 6 | 111960074 | 2640 | rs9487771, rs585057, rs689328, rs546913, rs9387058                                                       | AAGGG  | 2.05E-01 | 2.49E-01 | 1.61E-01 | 4.64E-09 |
| rs585057   | 6 | 111964664 | 2641 | rs585057, rs689328                                                                                       | AG     | 3.21E-01 | 3.56E-01 | 2.85E-01 | 4.31E-05 |
| rs585057   | 6 | 111964664 | 2641 | rs585057, rs689328, rs546913                                                                             | AGG    | 3.21E-01 | 3.56E-01 | 2.85E-01 | 4.02E-05 |

|            |   |           |      |                                                                     |        |          |          |          |          |
|------------|---|-----------|------|---------------------------------------------------------------------|--------|----------|----------|----------|----------|
| rs585057   | 6 | 111964664 | 2641 | rs585057, rs689328, rs546913, rs9387058                             | AGGG   | 2.15E-01 | 2.58E-01 | 1.71E-01 | 8.83E-09 |
| rs585057   | 6 | 111964664 | 2641 | rs585057, rs689328, rs546913, rs9387058                             | AGGG   | 2.15E-01 | 2.58E-01 | 1.71E-01 | 8.83E-09 |
| rs585057   | 6 | 111964664 | 2641 | rs585057, rs689328, rs546913, rs9387058                             | AGGG   | 2.15E-01 | 2.58E-01 | 1.71E-01 | 8.83E-09 |
| rs2286294  | 7 | 42172250  | 2742 | rs2286294, rs3801214, rs9886211, rs3779173, rs12540671, rs2108368   | AAAGGA | 2.16E-02 | 9.26E-03 | 3.42E-02 | 3.88E-06 |
| rs3801214  | 7 | 42173472  | 2743 | rs3801214, rs9886211, rs3779173, rs12540671, rs2108368              | AAGGA  | 2.70E-02 | 1.43E-02 | 4.01E-02 | 1.82E-05 |
| rs3801214  | 7 | 42173472  | 2743 | rs3801214, rs9886211, rs3779173, rs12540671, rs2108368, rs10951671  | AAGGAA | 2.70E-02 | 1.43E-02 | 4.01E-02 | 1.83E-05 |
| rs9886211  | 7 | 42177428  | 2744 | rs9886211, rs3779173, rs12540671, rs2108368                         | AGGA   | 2.69E-02 | 1.42E-02 | 3.99E-02 | 1.92E-05 |
| rs9886211  | 7 | 42177428  | 2744 | rs9886211, rs3779173, rs12540671, rs2108368, rs10951671             | AGGAA  | 2.68E-02 | 1.42E-02 | 3.98E-02 | 1.93E-05 |
| rs9886211  | 7 | 42177428  | 2744 | rs9886211, rs3779173, rs12540671, rs2108368, rs10951671, rs10261063 | AGGAAA | 2.65E-02 | 1.36E-02 | 3.98E-02 | 1.16E-05 |
| rs3779173  | 7 | 42181706  | 2745 | rs3779173, rs12540671, rs2108368                                    | GGA    | 2.71E-02 | 1.43E-02 | 4.02E-02 | 1.65E-05 |
| rs3779173  | 7 | 42181706  | 2745 | rs3779173, rs12540671, rs2108368, rs10951671                        | GGAA   | 2.71E-02 | 1.43E-02 | 4.02E-02 | 1.65E-05 |
| rs3779173  | 7 | 42181706  | 2745 | rs3779173, rs12540671, rs2108368, rs10951671, rs10261063            | GGAAA  | 2.67E-02 | 1.36E-02 | 4.01E-02 | 9.48E-06 |
| rs3779173  | 7 | 42181706  | 2745 | rs3779173, rs12540671, rs2108368, rs10951671, rs10261063, rs3801216 | GGAAAG | 2.69E-02 | 1.39E-02 | 4.02E-02 | 1.22E-05 |
| rs12540671 | 7 | 42182214  | 2746 | rs12540671, rs2108368                                               | GA     | 2.71E-02 | 1.43E-02 | 4.02E-02 | 1.65E-05 |
| rs12540671 | 7 | 42182214  | 2746 | rs12540671, rs2108368, rs10951671                                   | GAA    | 2.71E-02 | 1.43E-02 | 4.02E-02 | 1.65E-05 |
| rs12540671 | 7 | 42182214  | 2746 | rs12540671, rs2108368, rs10951671, rs10261063                       | GAAA   | 2.71E-02 | 1.43E-02 | 4.02E-02 | 1.66E-05 |
| rs12540671 | 7 | 42182214  | 2746 | rs12540671, rs2108368, rs10951671, rs10261063, rs3801216            | GAAAG  | 2.71E-02 | 1.43E-02 | 4.02E-02 | 1.63E-05 |
| rs3735030  | 7 | 131386942 | 3705 | rs3735030, rs3847106                                                | GG     | 8.72E-01 | 8.46E-01 | 8.98E-01 | 2.44E-05 |
| rs3735030  | 7 | 131386942 | 3705 | rs3735030, rs3847106, rs17165599                                    | GGA    | 8.71E-01 | 8.44E-01 | 8.98E-01 | 2.18E-05 |
| rs3847106  | 7 | 131395288 | 3706 | rs3847106, rs17165599                                               | GA     | 8.72E-01 | 8.45E-01 | 8.99E-01 | 1.49E-05 |
| rs17162012 | 7 | 141246510 | 3804 | rs17162012, rs4726433, rs10256379, rs4726441                        | AAGA   | 9.20E-02 | 1.14E-01 | 6.97E-02 | 3.79E-05 |
| rs17162012 | 7 | 141246510 | 3804 | rs17162012, rs4726433, rs10256379, rs4726441, rs216996              | AAGAA  | 9.11E-02 | 1.13E-01 | 6.88E-02 | 3.38E-05 |

|            |   |           |      |                                                                                |        |          |          |          |          |
|------------|---|-----------|------|--------------------------------------------------------------------------------|--------|----------|----------|----------|----------|
| rs17162012 | 7 | 141246510 | 3804 | rs17162012, rs4726433, rs10256379, rs4726441, rs216996, rs4726443              | AAGAAC | 9.14E-02 | 1.13E-01 | 6.91E-02 | 3.78E-05 |
| rs4726433  | 7 | 141254813 | 3805 | rs4726433, rs10256379, rs4726441, rs4726433, rs10256379, rs4726441, rs216996   | AGA    | 9.33E-02 | 1.15E-01 | 7.10E-02 | 4.15E-05 |
| rs4726433  | 7 | 141254813 | 3805 | rs4726433, rs10256379, rs4726441, rs216996, rs4726443                          | AGAA   | 9.25E-02 | 1.14E-01 | 7.01E-02 | 3.73E-05 |
| rs4726433  | 7 | 141254813 | 3805 | rs4726433, rs10256379, rs4726441, rs216996, rs4726443                          | AGAAC  | 9.25E-02 | 1.14E-01 | 7.01E-02 | 4.11E-05 |
| rs4726433  | 7 | 141254813 | 3805 | rs4726433, rs10256379, rs4726441, rs216996, rs4726443, rs216997                | AGAACG | 9.26E-02 | 1.15E-01 | 7.03E-02 | 4.15E-05 |
| rs10256379 | 7 | 141255339 | 3806 | rs10256379, rs4726441                                                          | GA     | 9.33E-02 | 1.15E-01 | 7.10E-02 | 4.23E-05 |
| rs10256379 | 7 | 141255339 | 3806 | rs10256379, rs4726441, rs216996, rs10256379, rs4726441, rs216996, rs4726443    | GAA    | 9.25E-02 | 1.14E-01 | 7.02E-02 | 4.01E-05 |
| rs10256379 | 7 | 141255339 | 3806 | rs10256379, rs4726441, rs216996, rs4726443                                     | GAAC   | 9.26E-02 | 1.14E-01 | 7.02E-02 | 4.00E-05 |
| rs10256379 | 7 | 141255339 | 3806 | rs10256379, rs4726441, rs216996, rs4726443, rs216997                           | GAACG  | 9.26E-02 | 1.14E-01 | 7.03E-02 | 4.04E-05 |
| rs13262708 | 8 | 1943903   | 3996 | rs13262708, rs17064407, rs17830077, rs2280823, rs2280822, rs17064417           | AAAAAG | 2.85E-02 | 1.52E-02 | 4.20E-02 | 1.20E-05 |
| rs17064407 | 8 | 1949008   | 3997 | rs17064407, rs17830077, rs2280823, rs2280822, rs17064417                       | AAAAG  | 3.02E-02 | 1.70E-02 | 4.37E-02 | 2.49E-05 |
| rs17064407 | 8 | 1949008   | 3997 | rs17064407, rs17830077, rs2280823, rs2280822, rs17064417, rs17830107           | AAAAGA | 3.02E-02 | 1.69E-02 | 4.37E-02 | 2.31E-05 |
| rs17830077 | 8 | 1949008   | 3998 | rs17830077, rs2280823, rs2280822, rs17064417                                   | AAAG   | 3.02E-02 | 1.70E-02 | 4.37E-02 | 2.57E-05 |
| rs17830077 | 8 | 1949008   | 3998 | rs17830077, rs2280823, rs2280822, rs17064417, rs17830107                       | AAAGA  | 3.02E-02 | 1.70E-02 | 4.37E-02 | 2.60E-05 |
| rs17830077 | 8 | 1949008   | 3998 | rs17830077, rs2280823, rs2280822, rs17064417, rs17830107, rs17750595           | AAAGAA | 2.94E-02 | 1.56E-02 | 4.35E-02 | 8.32E-06 |
| rs2280823  | 8 | 1949491   | 3999 | rs2280823, rs2280822, rs17064417, rs2280823, rs2280822, rs17064417, rs17830107 | AAG    | 3.02E-02 | 1.70E-02 | 4.37E-02 | 2.57E-05 |
| rs2280823  | 8 | 1949491   | 3999 | rs2280823, rs2280822, rs17064417, rs17830107, rs17750595                       | AAGA   | 3.02E-02 | 1.70E-02 | 4.37E-02 | 2.59E-05 |
| rs2280823  | 8 | 1949491   | 3999 | rs2280823, rs2280822, rs17064417, rs17830107, rs17750595, rs3779713            | AAGAA  | 2.94E-02 | 1.56E-02 | 4.35E-02 | 8.26E-06 |
| rs2280823  | 8 | 1949491   | 3999 | rs2280823, rs2280822, rs17064417, rs17830107, rs17750595, rs3779713            | AAGAAG | 2.94E-02 | 1.56E-02 | 4.35E-02 | 7.90E-06 |
| rs2280822  | 8 | 1949561   | 4000 | rs2280822, rs17064417                                                          | AG     | 3.02E-02 | 1.70E-02 | 4.37E-02 | 2.62E-05 |
| rs2280822  | 8 | 1949561   | 4000 | rs2280822, rs17064417, rs17830107                                              | AGA    | 3.02E-02 | 1.70E-02 | 4.36E-02 | 2.68E-05 |

|            |   |           |      |                                                                     |        |          |          |          |          |
|------------|---|-----------|------|---------------------------------------------------------------------|--------|----------|----------|----------|----------|
| rs2280822  | 8 | 1949561   | 4000 | rs2280822, rs17064417, rs17830107, rs17750595                       | AGAA   | 2.93E-02 | 1.55E-02 | 4.33E-02 | 9.44E-06 |
| rs2280822  | 8 | 1949561   | 4000 | rs2280822, rs17064417, rs17830107, rs17750595, rs3779713            | AGAAG  | 2.93E-02 | 1.56E-02 | 4.33E-02 | 8.94E-06 |
| rs2280822  | 8 | 1949561   | 4000 | rs2280822, rs17064417, rs17830107, rs17750595, rs3779713, rs4876271 | AGAAGG | 2.91E-02 | 1.51E-02 | 4.35E-02 | 5.49E-06 |
| rs17064417 | 8 | 1950381   | 4001 | rs17064417, rs17830107                                              | GA     | 3.01E-02 | 1.70E-02 | 4.36E-02 | 2.61E-05 |
| rs17064417 | 8 | 1950381   | 4001 | rs17064417, rs17830107, rs17750595                                  | GAA    | 2.90E-02 | 1.54E-02 | 4.29E-02 | 1.04E-05 |
| rs17064417 | 8 | 1950381   | 4001 | rs17064417, rs17830107, rs17750595, rs3779713                       | GAAG   | 2.93E-02 | 1.56E-02 | 4.33E-02 | 9.00E-06 |
| rs17064417 | 8 | 1950381   | 4001 | rs17064417, rs17830107, rs17750595, rs3779713, rs4876271            | GAAGG  | 2.91E-02 | 1.51E-02 | 4.34E-02 | 5.40E-06 |
| rs17064417 | 8 | 1950381   | 4001 | rs17064417, rs17830107, rs17750595, rs3779713, rs4876271, rs7386942 | GAAGGA | 2.81E-02 | 1.51E-02 | 4.14E-02 | 1.31E-05 |
| rs7009635  | 8 | 140584782 | 5933 | rs7009635, rs6985156, rs7843258                                     | AGA    | 1.77E-01 | 2.07E-01 | 1.46E-01 | 1.38E-05 |
| rs7009635  | 8 | 140584782 | 5933 | rs7009635, rs6985156, rs7843258, rs4961271                          | AGAG   | 1.77E-01 | 2.07E-01 | 1.46E-01 | 1.31E-05 |
| rs7009635  | 8 | 140584782 | 5933 | rs7009635, rs6985156, rs7843258, rs4961271, rs7001653               | AGAGG  | 1.76E-01 | 2.06E-01 | 1.44E-01 | 1.01E-05 |
| rs7009635  | 8 | 140584782 | 5933 | rs7009635, rs6985156, rs7843258, rs4961271, rs7001653, rs2176397    | AGAGGG | 1.75E-01 | 2.05E-01 | 1.44E-01 | 1.23E-05 |
| rs6985156  | 8 | 140584924 | 5934 | rs6985156, rs7843258                                                | GA     | 1.85E-01 | 2.16E-01 | 1.54E-01 | 1.83E-05 |
| rs6985156  | 8 | 140584924 | 5934 | rs6985156, rs7843258, rs4961271                                     | GAG    | 1.85E-01 | 2.16E-01 | 1.54E-01 | 1.74E-05 |
| rs6985156  | 8 | 140584924 | 5934 | rs6985156, rs7843258, rs4961271, rs7001653                          | GAGG   | 1.84E-01 | 2.15E-01 | 1.52E-01 | 1.12E-05 |
| rs6985156  | 8 | 140584924 | 5934 | rs6985156, rs7843258, rs4961271, rs7001653, rs2176397               | GAGGG  | 1.84E-01 | 2.15E-01 | 1.52E-01 | 1.06E-05 |
| rs7843258  | 8 | 140591443 | 5935 | rs7843258, rs4961271                                                | AG     | 1.85E-01 | 2.16E-01 | 1.54E-01 | 1.74E-05 |
| rs7843258  | 8 | 140591443 | 5935 | rs7843258, rs4961271                                                | GA     | 8.10E-01 | 7.79E-01 | 8.41E-01 | 1.74E-05 |
| rs7843258  | 8 | 140591443 | 5935 | rs7843258, rs4961271, rs7001653                                     | AGG    | 1.84E-01 | 2.15E-01 | 1.52E-01 | 1.19E-05 |
| rs7843258  | 8 | 140591443 | 5935 | rs7843258, rs4961271, rs7001653, rs2176397                          | AGGG   | 1.84E-01 | 2.15E-01 | 1.52E-01 | 1.14E-05 |
| rs4961271  | 8 | 140596890 | 5936 | rs4961271, rs7001653                                                | GG     | 1.88E-01 | 2.19E-01 | 1.57E-01 | 1.60E-05 |
| rs4961271  | 8 | 140596890 | 5936 | rs4961271, rs7001653, rs2176397                                     | GGG    | 1.84E-01 | 2.15E-01 | 1.52E-01 | 1.26E-05 |
| rs7035057  | 9 | 76903299  | 6407 | rs7035057, rs10869843, rs3843581, rs17787855, rs10869844            | AGAGA  | 1.57E-02 | 2.51E-02 | 6.30E-03 | 4.50E-05 |

|            |   |          |      |                                                               |        |          |          |          |          |
|------------|---|----------|------|---------------------------------------------------------------|--------|----------|----------|----------|----------|
| rs10869843 | 9 | 76906820 | 6408 | rs10869843, rs3843581, rs17787855, rs10869844                 | GAGA   | 1.59E-02 | 2.54E-02 | 6.27E-03 | 3.53E-05 |
| rs3843581  | 9 | 76909840 | 6409 | rs3843581, rs17787855, rs10869844                             | AGA    | 1.60E-02 | 2.54E-02 | 6.45E-03 | 4.78E-05 |
| rs3843581  | 9 | 76909840 | 6409 | rs3843581, rs17787855, rs10869844, rs1929533                  | AGAA   | 1.60E-02 | 2.54E-02 | 6.45E-03 | 4.87E-05 |
| rs17787855 | 9 | 76911896 | 6410 | rs17787855, rs10869844, rs1929533, rs10121560                 | GAAG   | 1.79E-02 | 2.78E-02 | 7.81E-03 | 4.78E-05 |
| rs655500   | 9 | 87956825 | 6464 | rs655500, rs668108, rs1167                                    | AAG    | 8.99E-01 | 8.77E-01 | 9.22E-01 | 4.70E-05 |
| rs655500   | 9 | 87956825 | 6464 | rs655500, rs668108, rs1167                                    | CGA    | 9.51E-02 | 1.17E-01 | 7.28E-02 | 4.70E-05 |
| rs655500   | 9 | 87956825 | 6464 | rs655500, rs668108, rs1167, rs560019                          | CGAG   | 9.41E-02 | 1.16E-01 | 7.19E-02 | 4.47E-05 |
| rs655500   | 9 | 87956825 | 6464 | rs655500, rs668108, rs1167, rs560019, rs2271992               | CGAGG  | 9.42E-02 | 1.16E-01 | 7.19E-02 | 4.42E-05 |
| rs655500   | 9 | 87956825 | 6464 | rs655500, rs668108, rs1167, rs560019, rs2271992, rs622418     | CGAGGG | 9.42E-02 | 1.16E-01 | 7.19E-02 | 4.43E-05 |
| rs668108   | 9 | 87966510 | 6465 | rs668108, rs1167                                              | AG     | 9.00E-01 | 8.77E-01 | 9.24E-01 | 1.33E-05 |
| rs668108   | 9 | 87966510 | 6465 | rs668108, rs1167                                              | GA     | 9.86E-02 | 1.22E-01 | 7.42E-02 | 1.33E-05 |
| rs668108   | 9 | 87966510 | 6465 | rs668108, rs1167, rs560019                                    | GAG    | 9.76E-02 | 1.21E-01 | 7.33E-02 | 1.26E-05 |
| rs668108   | 9 | 87966510 | 6465 | rs668108, rs1167, rs560019                                    | AGA    | 6.25E-01 | 5.89E-01 | 6.62E-01 | 3.37E-05 |
| rs668108   | 9 | 87966510 | 6465 | rs668108, rs1167, rs560019, rs2271992                         | GAGG   | 9.76E-02 | 1.21E-01 | 7.33E-02 | 1.25E-05 |
| rs668108   | 9 | 87966510 | 6465 | rs668108, rs1167, rs560019, rs2271992, rs622418               | GAGGG  | 9.76E-02 | 1.21E-01 | 7.33E-02 | 1.25E-05 |
| rs668108   | 9 | 87966510 | 6465 | rs668108, rs1167, rs560019, rs2271992, rs622418, rs665983     | GAGGGG | 9.25E-02 | 1.15E-01 | 6.91E-02 | 1.67E-05 |
| rs1167     | 9 | 87966831 | 6466 | rs1167, rs560019                                              | AG     | 9.79E-02 | 1.22E-01 | 7.33E-02 | 9.27E-06 |
| rs1167     | 9 | 87966831 | 6466 | rs1167, rs560019                                              | GA     | 6.26E-01 | 5.89E-01 | 6.63E-01 | 3.15E-05 |
| rs1167     | 9 | 87966831 | 6466 | rs1167, rs560019, rs2271992                                   | AGG    | 9.79E-02 | 1.22E-01 | 7.33E-02 | 9.16E-06 |
| rs1167     | 9 | 87966831 | 6466 | rs1167, rs560019, rs2271992, rs622418                         | AGGG   | 9.79E-02 | 1.22E-01 | 7.33E-02 | 9.16E-06 |
| rs1167     | 9 | 87966831 | 6466 | rs1167, rs560019, rs2271992, rs622418, rs665983               | AGGGG  | 9.28E-02 | 1.16E-01 | 6.91E-02 | 1.23E-05 |
| rs1167     | 9 | 87966831 | 6466 | rs1167, rs560019, rs2271992, rs622418, rs665983, rs28364935   | AGGGGC | 9.28E-02 | 1.16E-01 | 6.91E-02 | 1.13E-05 |
| rs560019   | 9 | 87968606 | 6467 | rs560019, rs2271992                                           | GG     | 3.73E-01 | 4.10E-01 | 3.36E-01 | 3.19E-05 |
| rs560019   | 9 | 87968606 | 6467 | rs560019, rs2271992, rs622418                                 | GGG    | 3.73E-01 | 4.10E-01 | 3.36E-01 | 3.20E-05 |
| rs560019   | 9 | 87968606 | 6467 | rs560019, rs2271992, rs622418, rs665983, rs28364935, rs572992 | GGGGCC | 9.06E-02 | 1.13E-01 | 6.74E-02 | 1.37E-05 |

|            |   |          |      |                                                                  |        |          |          |          |          |
|------------|---|----------|------|------------------------------------------------------------------|--------|----------|----------|----------|----------|
| rs2271992  | 9 | 87969563 | 6468 | rs2271992, rs622418, rs665983, rs28364935, rs572992              | GGGCC  | 9.15E-02 | 1.14E-01 | 6.90E-02 | 2.56E-05 |
| rs2271992  | 9 | 87969563 | 6468 | rs2271992, rs622418, rs665983, rs28364935, rs572992, rs3898637   | GGGCCA | 9.16E-02 | 1.14E-01 | 6.92E-02 | 2.61E-05 |
| rs622418   | 9 | 87971128 | 6469 | rs622418, rs665983, rs28364935, rs572992                         | GGCC   | 9.91E-02 | 1.21E-01 | 7.64E-02 | 4.71E-05 |
| rs665983   | 9 | 87973988 | 6470 | rs665983, rs28364935, rs572992                                   | GCC    | 1.02E-01 | 1.25E-01 | 7.82E-02 | 2.87E-05 |
| rs665983   | 9 | 87973988 | 6470 | rs665983, rs28364935, rs572992, rs3898637                        | GCCA   | 1.02E-01 | 1.25E-01 | 7.82E-02 | 3.44E-05 |
| rs665983   | 9 | 87973988 | 6470 | rs665983, rs28364935, rs572992, rs3898637, rs473082              | GCCAC  | 1.02E-01 | 1.25E-01 | 7.84E-02 | 3.80E-05 |
| rs665983   | 9 | 87973988 | 6470 | rs665983, rs28364935, rs572992, rs3898637, rs473082, rs10868677  | GCCACG | 1.02E-01 | 1.25E-01 | 7.84E-02 | 3.72E-05 |
| rs28364935 | 9 | 87974055 | 6471 | rs28364935, rs572992                                             | CC     | 3.53E-01 | 3.93E-01 | 3.13E-01 | 8.57E-06 |
| rs28364935 | 9 | 87974055 | 6471 | rs28364935, rs572992, rs3898637                                  | CCA    | 3.54E-01 | 3.93E-01 | 3.14E-01 | 8.63E-06 |
| rs28364935 | 9 | 87974055 | 6471 | rs28364935, rs572992, rs3898637, rs473082                        | CCAC   | 3.52E-01 | 3.92E-01 | 3.11E-01 | 7.81E-06 |
| rs28364935 | 9 | 87974055 | 6471 | rs28364935, rs572992, rs3898637, rs473082, rs10868677            | CCACG  | 3.52E-01 | 3.91E-01 | 3.12E-01 | 1.08E-05 |
| rs28364935 | 9 | 87974055 | 6471 | rs28364935, rs572992, rs3898637, rs473082, rs10868677, rs652529  | CCACGG | 3.52E-01 | 3.91E-01 | 3.11E-01 | 8.88E-06 |
| rs572992   | 9 | 87975735 | 6472 | rs572992, rs3898637                                              | CA     | 3.54E-01 | 3.93E-01 | 3.15E-01 | 9.87E-06 |
| rs572992   | 9 | 87975735 | 6472 | rs572992, rs3898637, rs473082                                    | CAC    | 3.53E-01 | 3.92E-01 | 3.13E-01 | 7.58E-06 |
| rs572992   | 9 | 87975735 | 6472 | rs572992, rs3898637, rs473082, rs10868677                        | CACG   | 3.53E-01 | 3.92E-01 | 3.13E-01 | 7.59E-06 |
| rs572992   | 9 | 87975735 | 6472 | rs572992, rs3898637, rs473082, rs10868677, rs652529              | CACGG  | 3.53E-01 | 3.93E-01 | 3.12E-01 | 6.54E-06 |
| rs572992   | 9 | 87975735 | 6472 | rs572992, rs3898637, rs473082, rs10868677, rs652529, rs7043672   | CACGGG | 1.18E-01 | 1.43E-01 | 9.26E-02 | 3.16E-05 |
| rs3898637  | 9 | 87986088 | 6473 | rs3898637, rs473082                                              | AC     | 3.72E-01 | 4.10E-01 | 3.34E-01 | 1.89E-05 |
| rs3898637  | 9 | 87986088 | 6473 | rs3898637, rs473082, rs10868677                                  | ACG    | 3.72E-01 | 4.10E-01 | 3.34E-01 | 1.89E-05 |
| rs3898637  | 9 | 87986088 | 6473 | rs3898637, rs473082, rs10868677, rs652529                        | ACGG   | 3.59E-01 | 3.98E-01 | 3.18E-01 | 6.95E-06 |
| rs3898637  | 9 | 87986088 | 6473 | rs3898637, rs473082, rs10868677, rs652529, rs7043672             | ACGGG  | 1.21E-01 | 1.46E-01 | 9.60E-02 | 4.89E-05 |
| rs3898637  | 9 | 87986088 | 6473 | rs3898637, rs473082, rs10868677, rs652529, rs7043672, rs13296013 | ACGGGA | 1.19E-01 | 1.43E-01 | 9.37E-02 | 4.24E-05 |

|            |   |           |      |                                                                  |        |          |          |          |          |
|------------|---|-----------|------|------------------------------------------------------------------|--------|----------|----------|----------|----------|
| rs473082   | 9 | 87988200  | 6474 | rs473082, rs10868677                                             | CG     | 3.72E-01 | 4.10E-01 | 3.34E-01 | 1.89E-05 |
| rs473082   | 9 | 87988200  | 6474 | rs473082, rs10868677, rs652529                                   | CGG    | 3.59E-01 | 3.98E-01 | 3.18E-01 | 6.95E-06 |
| rs473082   | 9 | 87988200  | 6474 | rs473082, rs10868677, rs652529, rs7043672                        | CGGG   | 1.21E-01 | 1.45E-01 | 9.57E-02 | 4.92E-05 |
| rs473082   | 9 | 87988200  | 6474 | rs473082, rs10868677, rs652529, rs7043672, rs13296013            | CGGGA  | 1.18E-01 | 1.42E-01 | 9.40E-02 | 4.35E-05 |
| rs473082   | 9 | 87988200  | 6474 | rs473082, rs10868677, rs652529, rs7043672, rs13296013, rs7864469 | CGGGAA | 1.18E-01 | 1.42E-01 | 9.25E-02 | 2.21E-05 |
| rs10868677 | 9 | 87996957  | 6475 | rs10868677, rs652529                                             | GG     | 3.58E-01 | 3.98E-01 | 3.18E-01 | 6.95E-06 |
| rs10868677 | 9 | 87996957  | 6475 | rs10868677, rs652529, rs7043672, rs13296013                      | GGGA   | 1.17E-01 | 1.41E-01 | 9.30E-02 | 4.05E-05 |
| rs10868677 | 9 | 87996957  | 6475 | rs10868677, rs652529, rs7043672, rs13296013, rs7864469           | GGGAA  | 1.16E-01 | 1.41E-01 | 9.14E-02 | 2.01E-05 |
| rs652529   | 9 | 87999000  | 6476 | rs652529, rs7043672                                              | GG     | 1.20E-01 | 1.44E-01 | 9.47E-02 | 3.81E-05 |
| rs652529   | 9 | 87999000  | 6476 | rs652529, rs7043672, rs13296013                                  | GGA    | 1.17E-01 | 1.42E-01 | 9.28E-02 | 3.15E-05 |
| rs652529   | 9 | 87999000  | 6476 | rs652529, rs7043672, rs13296013, rs7864469                       | GGAA   | 1.17E-01 | 1.41E-01 | 9.20E-02 | 2.12E-05 |
| rs7849325  | 9 | 107148803 | 6608 | rs7849325, rs784677                                              | AA     | 3.84E-01 | 3.47E-01 | 4.21E-01 | 3.55E-05 |
| rs7849325  | 9 | 107148803 | 6608 | rs7849325, rs784677, rs784676                                    | AAC    | 3.84E-01 | 3.47E-01 | 4.22E-01 | 3.61E-05 |
| rs784677   | 9 | 107150170 | 6609 | rs784677, rs784676                                               | AC     | 3.86E-01 | 3.49E-01 | 4.23E-01 | 4.06E-05 |
| rs2418267  | 9 | 114128316 | 6664 | rs2418267, rs13300798, rs891721, rs891720, rs1017360, rs7868176  | GGACGA | 1.50E-01 | 1.81E-01 | 1.19E-01 | 2.77E-06 |
| rs13300798 | 9 | 114133107 | 6665 | rs13300798, rs891721, rs891720, rs1017360, rs7868176             | GACGA  | 1.56E-01 | 1.85E-01 | 1.26E-01 | 9.86E-06 |
| rs13300798 | 9 | 114133107 | 6665 | rs13300798, rs891721, rs891720, rs1017360, rs7868176, rs737174   | GACGAC | 1.51E-01 | 1.81E-01 | 1.19E-01 | 2.56E-06 |
| rs891721   | 9 | 114134686 | 6666 | rs891721, rs891720, rs1017360, rs7868176                         | ACGA   | 1.52E-01 | 1.79E-01 | 1.24E-01 | 3.40E-05 |
| rs891721   | 9 | 114134686 | 6666 | rs891721, rs891720, rs1017360, rs7868176, rs737174               | ACGAC  | 1.50E-01 | 1.81E-01 | 1.19E-01 | 2.44E-06 |
| rs891721   | 9 | 114134686 | 6666 | rs891721, rs891720, rs1017360, rs7868176, rs737174, rs2043195    | ACGACG | 1.46E-01 | 1.76E-01 | 1.15E-01 | 2.53E-06 |
| rs1017360  | 9 | 114139646 | 6668 | rs1017360, rs7868176, rs737174, rs2043195, rs10817573, rs2002284 | GACGGA | 1.42E-01 | 1.71E-01 | 1.14E-01 | 1.10E-05 |
| rs7868176  | 9 | 114140502 | 6669 | rs7868176, rs737174, rs2043195, rs10817573, rs2002284            | ACGGA  | 1.42E-01 | 1.71E-01 | 1.14E-01 | 1.15E-05 |



|            |    |           |      |                                                                       |        |          |          |          |          |
|------------|----|-----------|------|-----------------------------------------------------------------------|--------|----------|----------|----------|----------|
| rs737174   | 9  | 114141130 | 6670 | rs737174, rs2043195, rs10817573, rs2002284                            | CGGA   | 1.42E-01 | 1.71E-01 | 1.14E-01 | 1.15E-05 |
| rs2043195  | 9  | 114142254 | 6671 | rs2043195, rs10817573, rs2002284                                      | GGA    | 1.42E-01 | 1.70E-01 | 1.13E-01 | 1.19E-05 |
| rs10817573 | 9  | 114145168 | 6672 | rs10817573, rs2002284                                                 | GA     | 1.43E-01 | 1.71E-01 | 1.14E-01 | 8.87E-06 |
| rs7914787  | 10 | 70102898  | 7199 | rs7914787, rs7917290, rs7905431, rs2271699                            | AGGG   | 7.89E-02 | 9.92E-02 | 5.82E-02 | 4.33E-05 |
| rs7914787  | 10 | 70102898  | 7199 | rs7914787, rs7917290, rs7905431, rs2271699, rs2271698                 | AGGGG  | 7.85E-02 | 9.87E-02 | 5.80E-02 | 4.70E-05 |
| rs7917290  | 10 | 70106405  | 7200 | rs7917290, rs7905431, rs2271699                                       | GGG    | 7.90E-02 | 9.93E-02 | 5.83E-02 | 3.99E-05 |
| rs7917290  | 10 | 70106405  | 7200 | rs7917290, rs7905431, rs2271699, rs2271698                            | GGGG   | 7.90E-02 | 9.93E-02 | 5.83E-02 | 3.99E-05 |
| rs7074815  | 10 | 99350066  | 7257 | rs7074815, rs11190065, rs3750895, rs12098418, rs11190074, rs17568778  | AAGGAA | 6.85E-02 | 4.82E-02 | 8.93E-02 | 1.42E-05 |
| rs11190065 | 10 | 99355700  | 7258 | rs11190065, rs3750895, rs12098418, rs11190074, rs17568778             | AGGAA  | 6.86E-02 | 4.83E-02 | 8.94E-02 | 1.29E-05 |
| rs11190065 | 10 | 99355700  | 7258 | rs11190065, rs3750895, rs12098418, rs11190074, rs17568778, rs12268069 | AGGAAG | 6.86E-02 | 4.83E-02 | 8.95E-02 | 1.29E-05 |
| rs3750895  | 10 | 99357800  | 7259 | rs3750895, rs12098418, rs11190074, rs17568778                         | GGAA   | 7.00E-02 | 4.94E-02 | 9.11E-02 | 1.18E-05 |
| rs3750895  | 10 | 99357800  | 7259 | rs3750895, rs12098418, rs11190074, rs17568778, rs12268069             | GGAAG  | 6.94E-02 | 4.90E-02 | 9.03E-02 | 1.32E-05 |
| rs3750895  | 10 | 99357800  | 7259 | rs3750895, rs12098418, rs11190074, rs17568778, rs12268069, rs4919304  | GGAAGG | 6.93E-02 | 4.90E-02 | 9.02E-02 | 1.38E-05 |
| rs12098418 | 10 | 99357932  | 7260 | rs12098418, rs11190074, rs17568778                                    | GAA    | 6.90E-02 | 4.81E-02 | 9.04E-02 | 7.05E-06 |
| rs12098418 | 10 | 99357932  | 7260 | rs12098418, rs11190074, rs17568778, rs12268069                        | GAAG   | 6.93E-02 | 4.86E-02 | 9.05E-02 | 8.94E-06 |
| rs12098418 | 10 | 99357932  | 7260 | rs12098418, rs11190074, rs17568778, rs12268069, rs4919304             | GAAGG  | 6.93E-02 | 4.87E-02 | 9.03E-02 | 1.01E-05 |
| rs12098418 | 10 | 99357932  | 7260 | rs12098418, rs11190074, rs17568778, rs12268069, rs4919304, rs1892510  | GAAGGA | 6.93E-02 | 4.88E-02 | 9.03E-02 | 1.14E-05 |
| rs11190074 | 10 | 99361961  | 7261 | rs11190074, rs17568778                                                | AA     | 6.90E-02 | 4.83E-02 | 9.02E-02 | 8.16E-06 |
| rs11190074 | 10 | 99361961  | 7261 | rs11190074, rs17568778, rs12268069                                    | AAG    | 6.89E-02 | 4.84E-02 | 8.99E-02 | 9.85E-06 |
| rs11190074 | 10 | 99361961  | 7261 | rs11190074, rs17568778, rs12268069, rs4919304                         | AAGG   | 6.90E-02 | 4.88E-02 | 8.97E-02 | 1.22E-05 |

|            |    |          |      |                                                                      |        |          |          |          |          |
|------------|----|----------|------|----------------------------------------------------------------------|--------|----------|----------|----------|----------|
| rs11190074 | 10 | 99361961 | 7261 | rs11190074, rs17568778, rs12268069, rs4919304, rs1892510             | AAGGA  | 6.91E-02 | 4.89E-02 | 8.98E-02 | 1.10E-05 |
| rs11190074 | 10 | 99361961 | 7261 | rs11190074, rs17568778, rs12268069, rs4919304, rs1892510, rs10509735 | AAGGAC | 6.86E-02 | 4.87E-02 | 8.90E-02 | 1.50E-05 |
| rs17568778 | 10 | 99368605 | 7262 | rs17568778, rs12268069                                               | AG     | 7.13E-02 | 5.10E-02 | 9.22E-02 | 1.56E-05 |
| rs17568778 | 10 | 99368605 | 7262 | rs17568778, rs12268069, rs4919304                                    | AGG    | 7.13E-02 | 5.10E-02 | 9.21E-02 | 1.47E-05 |
| rs17568778 | 10 | 99368605 | 7262 | rs17568778, rs12268069, rs4919304, rs1892510                         | AGGA   | 7.11E-02 | 5.08E-02 | 9.18E-02 | 1.44E-05 |
| rs17568778 | 10 | 99368605 | 7262 | rs17568778, rs12268069, rs4919304, rs1892510, rs10509735             | AGGAC  | 7.03E-02 | 5.05E-02 | 9.05E-02 | 1.81E-05 |
| rs17568778 | 10 | 99368605 | 7262 | rs17568778, rs12268069, rs4919304, rs1892510, rs10509735, rs7084684  | AGGACA | 7.03E-02 | 5.01E-02 | 9.11E-02 | 1.39E-05 |
| rs2289711  | 12 | 27524572 | 7479 | rs2289711, rs2254279, rs7971294, rs306655, rs306664                  | CGAGA  | 2.85E-01 | 3.19E-01 | 2.51E-01 | 3.71E-05 |
| rs2289711  | 12 | 27524572 | 7479 | rs2289711, rs2254279, rs7971294, rs306655, rs306664, rs753891        | CGAGAA | 2.85E-01 | 3.19E-01 | 2.51E-01 | 3.12E-05 |
| rs2254279  | 12 | 27524884 | 7480 | rs2254279, rs7971294, rs306655, rs306664, rs753891                   | GAGAA  | 2.86E-01 | 3.19E-01 | 2.52E-01 | 3.70E-05 |
| rs306655   | 12 | 27539792 | 7482 | rs306655, rs306664                                                   | GG     | 5.85E-01 | 5.48E-01 | 6.23E-01 | 3.30E-05 |
| rs306664   | 12 | 27545818 | 7483 | rs306664, rs753891                                                   | AA     | 3.59E-01 | 3.96E-01 | 3.20E-01 | 1.71E-05 |
| rs306664   | 12 | 27545818 | 7483 | rs306664, rs753891, rs899069                                         | AAA    | 3.04E-01 | 3.40E-01 | 2.68E-01 | 2.45E-05 |
| rs306664   | 12 | 27545818 | 7483 | rs306664, rs753891, rs899069, rs7963570                              | AAAG   | 3.04E-01 | 3.40E-01 | 2.68E-01 | 1.90E-05 |
| rs306664   | 12 | 27545818 | 7483 | rs306664, rs753891, rs899069, rs7963570, rs7966993                   | AAAGG  | 3.04E-01 | 3.40E-01 | 2.68E-01 | 1.69E-05 |
| rs753891   | 12 | 27548131 | 7484 | rs753891, rs899069                                                   | AA     | 3.12E-01 | 3.47E-01 | 2.75E-01 | 2.53E-05 |
| rs753891   | 12 | 27548131 | 7484 | rs753891, rs899069, rs7963570                                        | AAG    | 3.12E-01 | 3.48E-01 | 2.75E-01 | 2.54E-05 |
| rs753891   | 12 | 27548131 | 7484 | rs753891, rs899069, rs7963570, rs7966993                             | AAGG   | 3.12E-01 | 3.48E-01 | 2.75E-01 | 2.67E-05 |
| rs899069   | 12 | 27550546 | 7485 | rs899069, rs7963570                                                  | AG     | 3.12E-01 | 3.48E-01 | 2.75E-01 | 2.54E-05 |
| rs899069   | 12 | 27550546 | 7485 | rs899069, rs7963570, rs7966993                                       | AGG    | 3.12E-01 | 3.48E-01 | 2.75E-01 | 2.54E-05 |
| rs256662   | 12 | 30804286 | 7592 | rs256662, rs7301387, rs256679                                        | AGA    | 3.35E-01 | 3.73E-01 | 2.97E-01 | 1.28E-05 |
| rs7301387  | 12 | 30807504 | 7593 | rs7301387, rs256679                                                  | GA     | 3.35E-01 | 3.73E-01 | 2.97E-01 | 1.31E-05 |
| rs17566447 | 12 | 42536475 | 7686 | rs17566447, rs7316200, rs1452106, rs1669947, rs2406870, rs10785347   | GGGAGG | 2.30E-01 | 1.99E-01 | 2.62E-01 | 4.43E-05 |

|            |    |          |      |                                                                              |        |          |          |          |          |
|------------|----|----------|------|------------------------------------------------------------------------------|--------|----------|----------|----------|----------|
| rs7316200  | 12 | 42539126 | 7687 | rs7316200, rs1452106, rs1669947, rs2406870, rs10785347                       | GGAGG  | 2.31E-01 | 1.99E-01 | 2.64E-01 | 3.11E-05 |
| rs7316200  | 12 | 42539126 | 7687 | rs7316200, rs1452106, rs1669947, rs2406870, rs10785347, rs12581019           | GGAGGG | 2.31E-01 | 1.99E-01 | 2.64E-01 | 3.95E-05 |
| rs1452106  | 12 | 42540905 | 7688 | rs1452106, rs1669947, rs2406870, rs1452106, rs1669947, rs2406870, rs10785347 | GAG    | 2.36E-01 | 2.03E-01 | 2.70E-01 | 1.58E-05 |
| rs1452106  | 12 | 42540905 | 7688 | rs1452106, rs1669947, rs2406870, rs10785347, rs12581019                      | GAGG   | 2.35E-01 | 2.00E-01 | 2.70E-01 | 8.05E-06 |
| rs1452106  | 12 | 42540905 | 7688 | rs1452106, rs1669947, rs2406870, rs10785347, rs12581019, rs11181563          | GAGGG  | 2.32E-01 | 1.98E-01 | 2.67E-01 | 8.93E-06 |
| rs1452106  | 12 | 42540905 | 7688 | rs1452106, rs1669947, rs2406870, rs10785347, rs12581019, rs11181563          | GAGGGG | 2.27E-01 | 1.92E-01 | 2.61E-01 | 7.27E-06 |
| rs1669947  | 12 | 42548432 | 7689 | rs1669947, rs2406870, rs10785347, rs12581019, rs11181563                     | AGGGG  | 2.53E-01 | 2.18E-01 | 2.89E-01 | 7.54E-06 |
| rs1669947  | 12 | 42548432 | 7689 | rs1669947, rs2406870, rs10785347, rs12581019, rs11181563, rs11181563         | AGGGGA | 2.45E-01 | 2.13E-01 | 2.78E-01 | 1.84E-05 |
| rs12873430 | 13 | 26971307 | 7871 | rs12873430, rs12875586, rs9581791, rs2421035, rs9512476                      | GAGAA  | 3.73E-01 | 3.37E-01 | 4.10E-01 | 4.74E-05 |
| rs12875586 | 13 | 26971748 | 7872 | rs12875586, rs9581791, rs2421035, rs9512476                                  | AGAA   | 3.74E-01 | 3.38E-01 | 4.12E-01 | 4.97E-05 |
| rs4461048  | 15 | 38756030 | 8919 | rs4461048, rs2958267, rs4608310, rs2912367                                   | GGGG   | 1.48E-01 | 1.77E-01 | 1.18E-01 | 9.04E-06 |
| rs4461048  | 15 | 38756030 | 8919 | rs4461048, rs2958267, rs4608310, rs2912367, rs2929655                        | GGGGA  | 1.46E-01 | 1.74E-01 | 1.18E-01 | 1.39E-05 |
| rs4461048  | 15 | 38756030 | 8919 | rs4461048, rs2958267, rs4608310, rs2912367, rs2929655, rs2929657             | GGGGAA | 1.46E-01 | 1.73E-01 | 1.18E-01 | 2.30E-05 |
| rs2958267  | 15 | 38758551 | 8920 | rs2958267, rs4608310, rs2912367, rs2958267, rs4608310, rs2912367, rs2929655  | GGG    | 1.57E-01 | 1.88E-01 | 1.26E-01 | 5.09E-06 |
| rs2958267  | 15 | 38758551 | 8920 | rs2958267, rs4608310, rs2912367, rs2929655, rs2929657                        | GGGA   | 1.54E-01 | 1.84E-01 | 1.24E-01 | 6.48E-06 |
| rs2958267  | 15 | 38758551 | 8920 | rs2958267, rs4608310, rs2912367, rs2929655, rs2929657                        | GGGAA  | 1.54E-01 | 1.83E-01 | 1.24E-01 | 9.25E-06 |
| rs2958267  | 15 | 38758551 | 8920 | rs2958267, rs4608310, rs2912367, rs2929655, rs2929657, rs16967429            | GGGAAA | 1.54E-01 | 1.83E-01 | 1.24E-01 | 8.89E-06 |
| rs4608310  | 15 | 38759783 | 8921 | rs4608310, rs2912367                                                         | GG     | 1.57E-01 | 1.88E-01 | 1.26E-01 | 5.10E-06 |
| rs4608310  | 15 | 38759783 | 8921 | rs4608310, rs2912367, rs2929655, rs4608310, rs2912367, rs2929655, rs2929655  | GGA    | 1.54E-01 | 1.84E-01 | 1.24E-01 | 6.48E-06 |
| rs4608310  | 15 | 38759783 | 8921 | rs4608310, rs2912367, rs2929655, rs2929657                                   | GGAA   | 1.54E-01 | 1.83E-01 | 1.24E-01 | 9.23E-06 |

|           |    |          |      |                                                                               |        |          |          |          |          |
|-----------|----|----------|------|-------------------------------------------------------------------------------|--------|----------|----------|----------|----------|
| rs4608310 | 15 | 38759783 | 8921 | rs4608310, rs2912367, rs2929655, rs2929657, rs16967429                        | GGAAA  | 1.53E-01 | 1.82E-01 | 1.24E-01 | 9.40E-06 |
| rs4608310 | 15 | 38759783 | 8921 | rs4608310, rs2912367, rs2929655, rs2929657, rs16967429, rs2929660             | GGAAAG | 1.52E-01 | 1.80E-01 | 1.24E-01 | 2.66E-05 |
| rs2912367 | 15 | 38763383 | 8922 | rs2912367, rs2929655                                                          | AG     | 8.15E-01 | 7.81E-01 | 8.50E-01 | 1.85E-06 |
| rs2912367 | 15 | 38763383 | 8922 | rs2912367, rs2929655                                                          | GA     | 1.54E-01 | 1.84E-01 | 1.24E-01 | 6.47E-06 |
| rs2912367 | 15 | 38763383 | 8922 | rs2912367, rs2929655, rs2929657                                               | GAA    | 1.54E-01 | 1.83E-01 | 1.24E-01 | 9.33E-06 |
| rs2912367 | 15 | 38763383 | 8922 | rs2912367, rs2929655, rs2929657, rs2912367, rs2929655, rs2929657, rs16967429  | AGC    | 7.85E-01 | 7.53E-01 | 8.18E-01 | 3.64E-05 |
| rs2912367 | 15 | 38763383 | 8922 | rs2912367, rs2929655, rs2929657, rs16967429, rs2929660                        | GAAA   | 1.54E-01 | 1.83E-01 | 1.24E-01 | 9.27E-06 |
| rs2912367 | 15 | 38763383 | 8922 | rs2912367, rs2929655, rs2929657, rs16967429, rs2929660, rs11636712            | GAAAG  | 1.52E-01 | 1.80E-01 | 1.24E-01 | 2.34E-05 |
| rs2912367 | 15 | 38763383 | 8922 | rs2912367, rs2929655, rs2929657, rs16967429, rs2929660, rs11636712            | GAAAGG | 1.52E-01 | 1.80E-01 | 1.24E-01 | 2.33E-05 |
| rs2929655 | 15 | 38765644 | 8923 | rs2929655, rs2929657                                                          | AA     | 1.81E-01 | 2.14E-01 | 1.48E-01 | 2.88E-06 |
| rs2929655 | 15 | 38765644 | 8923 | rs2929655, rs2929657                                                          | GC     | 7.86E-01 | 7.54E-01 | 8.18E-01 | 2.89E-05 |
| rs2929655 | 15 | 38765644 | 8923 | rs2929655, rs2929657, rs16967429, rs2929655, rs2929657, rs16967429, rs2929660 | AAA    | 1.54E-01 | 1.83E-01 | 1.24E-01 | 7.85E-06 |
| rs2929655 | 15 | 38765644 | 8923 | rs2929655, rs2929657, rs16967429, rs2929660, rs11636712                       | AAAG   | 1.53E-01 | 1.81E-01 | 1.24E-01 | 1.64E-05 |
| rs2929655 | 15 | 38765644 | 8923 | rs2929655, rs2929657, rs16967429, rs2929660, rs11636712                       | AAAGG  | 1.52E-01 | 1.80E-01 | 1.23E-01 | 1.60E-05 |
| rs2929655 | 15 | 38765644 | 8923 | rs2929655, rs2929657, rs16967429, rs2929660, rs11636712                       | AAAGG  | 1.52E-01 | 1.80E-01 | 1.23E-01 | 1.60E-05 |
| rs4889990 | 17 | 80184196 | 9339 | rs4889990, rs4889991, rs2044102, rs2044103, rs8065364                         | AACGA  | 9.20E-02 | 6.98E-02 | 1.15E-01 | 2.94E-05 |
| rs4889990 | 17 | 80184196 | 9339 | rs4889990, rs4889991, rs2044102, rs2044103, rs8065364, rs11655682             | AACGAA | 9.19E-02 | 6.92E-02 | 1.15E-01 | 1.80E-05 |
| rs4889991 | 17 | 80184264 | 9340 | rs4889991, rs2044102, rs2044103, rs8065364                                    | ACGA   | 1.49E-01 | 1.18E-01 | 1.80E-01 | 2.48E-06 |
| rs4889991 | 17 | 80184264 | 9340 | rs4889991, rs2044102, rs2044103, rs8065364, rs11655682                        | ACGAA  | 9.89E-02 | 7.54E-02 | 1.23E-01 | 1.61E-05 |
| rs4889991 | 17 | 80184264 | 9340 | rs4889991, rs2044102, rs2044103, rs8065364, rs11655682, rs8068433             | ACGAAA | 9.51E-02 | 7.03E-02 | 1.20E-01 | 3.06E-06 |
| rs2044102 | 17 | 80185561 | 9341 | rs2044102, rs2044103, rs8065364, rs2044102, rs2044103, rs8065364, rs11655682  | CGA    | 1.49E-01 | 1.18E-01 | 1.80E-01 | 2.47E-06 |
| rs2044102 | 17 | 80185561 | 9341 | rs2044102, rs2044103, rs8065364, rs11655682                                   | CGAA   | 9.90E-02 | 7.57E-02 | 1.23E-01 | 1.83E-05 |

|            |    |          |      |                                                                     |        |          |          |          |          |
|------------|----|----------|------|---------------------------------------------------------------------|--------|----------|----------|----------|----------|
| rs2044102  | 17 | 80185561 | 9341 | rs2044102, rs2044103, rs8065364, rs11655682, rs8068433              | CGAAA  | 9.50E-02 | 7.03E-02 | 1.20E-01 | 3.17E-06 |
| rs2044102  | 17 | 80185561 | 9341 | rs2044102, rs2044103, rs8065364, rs11655682, rs8068433, rs8068452   | CGAAAA | 9.51E-02 | 6.99E-02 | 1.21E-01 | 2.16E-06 |
| rs8110480  | 19 | 5195906  | 9523 | rs8110480, rs8105746                                                | GA     | 1.42E-01 | 1.70E-01 | 1.14E-01 | 1.71E-05 |
| rs8110480  | 19 | 5195906  | 9523 | rs8110480, rs8105746, rs11880284                                    | GAG    | 1.37E-01 | 1.63E-01 | 1.11E-01 | 3.53E-05 |
| rs8110480  | 19 | 5195906  | 9523 | rs8110480, rs8105746, rs11880284, rs737004                          | GAGA   | 1.33E-01 | 1.59E-01 | 1.06E-01 | 2.19E-05 |
| rs8110480  | 19 | 5195906  | 9523 | rs8110480, rs8105746, rs11880284, rs737004, rs2302224               | GAGAA  | 1.13E-01 | 1.38E-01 | 8.81E-02 | 1.44E-05 |
| rs8110480  | 19 | 5195906  | 9523 | rs8110480, rs8105746, rs11880284, rs737004, rs2302224, rs1143699    | GAGAAA | 1.10E-01 | 1.33E-01 | 8.72E-02 | 4.95E-05 |
| rs8105746  | 19 | 5200845  | 9524 | rs8105746, rs11880284, rs737004                                     | AGA    | 1.33E-01 | 1.58E-01 | 1.06E-01 | 3.12E-05 |
| rs8105746  | 19 | 5200856  | 9524 | rs8105746, rs11880284, rs737004, rs2302224                          | AGAA   | 1.13E-01 | 1.38E-01 | 8.78E-02 | 1.56E-05 |
| rs17210722 | 21 | 17169100 | 9774 | rs17210722, rs11702385, rs2824249, rs2824253, rs13047117, rs1501811 | AGCAGA | 1.92E-01 | 1.61E-01 | 2.24E-01 | 1.65E-05 |
| rs11702385 | 21 | 17169191 | 9775 | rs11702385, rs2824249, rs2824253, rs13047117, rs1501811             | GCAGA  | 1.92E-01 | 1.61E-01 | 2.24E-01 | 1.65E-05 |
| rs11702385 | 21 | 17169191 | 9775 | rs11702385, rs2824249, rs2824253, rs13047117, rs1501811, rs1604416  | GCAGAA | 1.90E-01 | 1.58E-01 | 2.21E-01 | 1.28E-05 |
| rs2824249  | 21 | 17170030 | 9776 | rs2824249, rs2824253, rs13047117, rs1501811                         | CAGA   | 1.92E-01 | 1.61E-01 | 2.23E-01 | 1.72E-05 |
| rs2824249  | 21 | 17170030 | 9776 | rs2824249, rs2824253, rs13047117, rs1501811, rs1604416              | CAGAA  | 1.89E-01 | 1.58E-01 | 2.21E-01 | 1.34E-05 |
| rs2824249  | 21 | 17170030 | 9776 | rs2824249, rs2824253, rs13047117, rs1501811, rs1604416, rs202892    | CAGAAG | 1.89E-01 | 1.58E-01 | 2.20E-01 | 1.50E-05 |
| rs2824253  | 21 | 17171821 | 9777 | rs2824253, rs13047117, rs1501811                                    | AGA    | 1.91E-01 | 1.60E-01 | 2.23E-01 | 1.30E-05 |
| rs2824253  | 21 | 17171821 | 9777 | rs2824253, rs13047117, rs1501811, rs1604416                         | AGAA   | 1.89E-01 | 1.57E-01 | 2.21E-01 | 1.11E-05 |
| rs2824253  | 21 | 17171821 | 9777 | rs2824253, rs13047117, rs1501811, rs1604416, rs202892               | AGAAG  | 1.89E-01 | 1.57E-01 | 2.21E-01 | 1.12E-05 |
| rs2824253  | 21 | 17171821 | 9777 | rs2824253, rs13047117, rs1501811, rs1604416, rs202892, rs7282090    | AGAAGG | 1.89E-01 | 1.58E-01 | 2.21E-01 | 1.11E-05 |

**Table S2. Sliding window haplotypes of 2-6 SNVs in length meeting a threshold of  $5 \times 10^{-5}$ .** First marker = first SNV defining the haplotype; CHR =

chromosome; POS = position; Block = block number; Markers Used = combined markers defining the haplotype; Haplotype = haplotype sequence;  
EM Freq = haplotype frequency within the affected population; Case = haplotype frequency within patients diagnosed at  $\leq 45$  years of age;  
Control = haplotype frequency within patients at  $> 45$  years-of-age; P =  $\chi^2$  p value.
