# Supplementary material for: Retrospective analysis of The Two Sister Study using haplotype-based association testing to identify loci associated with early-onset breast cancer
Source: bioRxiv or medRxiv preprint supplement (doi:10.1101/2020.12.04.20244251), 2020-12-28
Supplement: Supplementary file [file media-5.pdf]

**Supplemental Table S4. Marker characteristics.**

| Marker     | CHR | POS       | Gene            | Case Hom Minor | Control Hom Minor | Case Het | Control Het | Case Hom Major | Control Hom Major | Case HWE P | Control HWE P |
|------------|-----|-----------|-----------------|----------------|-------------------|----------|-------------|----------------|-------------------|------------|---------------|
| rs1885872  | 1   | 3688533   | TP73            | 13             | 3                 | 115      | 84          | 607            | 634               | 0.01       | 0.90          |
| rs3765731  | 1   | 3695328   | TP73            | 68             | 53                | 320      | 311         | 347            | 357               | 0.64       | 0.19          |
| rs12032272 | 1   | 3698592   | TP73            | 23             | 20                | 218      | 188         | 494            | 513               | 0.86       | 0.58          |
| rs3765736  | 1   | 3700037   | TP73            | 74             | 117               | 316      | 329         | 345            | 275               | 0.90       | 0.27          |
| rs7425814  | 2   | 149116355 | LYPD6B          | 110            | 102               | 341      | 333         | 284            | 284               | 0.64       | 0.78          |
| rs4349313  | 2   | 149118982 | LYPD6B          | 4              | 2                 | 27       | 26          | 704            | 693               | 0.00       | 0.00          |
| rs6714204  | 2   | 149122269 | LYPD6B          | 3              | 2                 | 27       | 25          | 705            | 694               | 0.00       | 0.00          |
| rs6720513  | 2   | 149122777 | LYPD6B          | 105            | 79                | 350      | 328         | 280            | 314               | 0.79       | 0.63          |
| rs7577550  | 2   | 149123213 | LYPD6B          | 19             | 16                | 191      | 182         | 525            | 523               | 0.74       | 0.97          |
| rs10803829 | 2   | 149124999 | LYPD6B          | 187            | 154               | 365      | 363         | 183            | 204               | 0.85       | 0.75          |
| rs10024144 | 4   | 122145420 | KIAA1109 (p)    | 1              | 3                 | 58       | 66          | 676            | 652               | 0.83       | 0.35          |
| rs11938795 | 4   | 122151854 | KIAA1109 (p)    | 31             | 78                | 282      | 282         | 422            | 361               | 0.06       | 0.04          |
| rs10005516 | 4   | 122163719 | KIAA1109 (p)    | 0              | 2                 | 43       | 49          | 692            | 670               | 0.41       | 0.28          |
| rs10471017 | 4   | 122169665 | KIAA1109 (p)    | 2              | 1                 | 20       | 23          | 713            | 697               | 0.00       | 0.09          |
| rs6848868  | 4   | 122229131 | KIAA1109 coding | 3              | 11                | 106      | 132         | 626            | 578               | 0.51       | 0.28          |
| rs56363411 | 4   | 122250504 | KIAA1109 coding | 1              | 0                 | 41       | 43          | 693            | 678               | 0.63       | 0.41          |
| rs45510500 | 4   | 122258745 | KIAA1109 coding | 2              | 1                 | 52       | 61          | 680            | 659               | 0.35       | 0.74          |
| rs13119723 | 4   | 122297158 | KIAA1109 coding | 8              | 31                | 154      | 174         | 570            | 512               | 0.50       | 0.00          |
| rs10032704 | 4   | 122385068 | ADAD1           | 125            | 105               | 348      | 331         | 256            | 283               | 0.72       | 0.61          |
| rs17388568 | 4   | 122408207 | ADAD1           | 47             | 35                | 287      | 273         | 401            | 413               | 0.65       | 0.23          |
| rs12499753 | 4   | 122412022 | ADAD1           | 79             | 59                | 332      | 296         | 324            | 365               | 0.66       | 0.93          |
| rs1479923  | 4   | 122449232 | IL2             | 77             | 49                | 324      | 295         | 334            | 377               | 0.90       | 0.39          |
| rs11575812 | 4   | 122449894 | IL2             | 34             | 89                | 299      | 292         | 402            | 340               | 0.02       | 0.04          |
| rs2069763  | 4   | 122456327 | IL2             | 79             | 59                | 329      | 296         | 327            | 366               | 0.78       | 0.94          |
| rs10857092 | 4   | 122468064 | 3'              | 6              | 2                 | 106      | 73          | 623            | 646               | 0.53       | 0.97          |
| rs6848139  | 4   | 122473886 | 3'              | 6              | 14                | 99       | 116         | 630            | 591               | 0.34       | 0.00          |
| rs671271   | 6   | 111940182 | regulatory      | 32             | 39                | 182      | 185         | 521            | 497               | 0.00       | 0.00          |

|            |    |           |            |     |     |     |     |     |     |      |      |
|------------|----|-----------|------------|-----|-----|-----|-----|-----|-----|------|------|
| rs17754910 | 6  | 111942528 | regulatory | 29  | 13  | 203 | 116 | 503 | 592 | 0.14 | 0.01 |
| rs490080   | 6  | 111944006 | regulatory | 1   | 0   | 32  | 34  | 700 | 687 | 0.32 | 0.52 |
| rs1327199  | 6  | 111954157 | regulatory | 0   | 0   | 35  | 26  | 700 | 695 | 0.51 | 0.62 |
| rs9487771  | 6  | 111960074 | regulatory | 21  | 28  | 173 | 178 | 541 | 514 | 0.12 | 0.01 |
| rs585057   | 6  | 111964664 | intergenic | 138 | 112 | 340 | 279 | 257 | 330 | 0.18 | 0.00 |
| rs17064417 | 8  | 1950381   | ARHGEF10   | 0   | 1   | 25  | 61  | 710 | 659 | 0.64 | 0.74 |
| rs17830107 | 8  | 1951525   | ARHGEF10   | 100 | 107 | 324 | 329 | 311 | 284 | 0.29 | 0.46 |
| rs17750595 | 8  | 1952204   | ARHGEF10   | 122 | 118 | 329 | 328 | 284 | 275 | 0.11 | 0.23 |
| rs3779713  | 8  | 1952244   | ARHGEF10   | 86  | 74  | 337 | 323 | 312 | 324 | 0.73 | 0.62 |
| rs4876271  | 8  | 1953764   | ARHGEF10   | 11  | 11  | 171 | 142 | 553 | 567 | 0.59 | 0.54 |
| rs7009635  | 8  | 140584782 | AGO2       | 151 | 133 | 384 | 349 | 199 | 239 | 0.17 | 0.78 |
| rs6985156  | 8  | 140584924 | AGO2       | 8   | 8   | 144 | 158 | 583 | 555 | 0.79 | 0.38 |
| rs7843258  | 8  | 140591443 | AGO2       | 26  | 16  | 265 | 190 | 444 | 515 | 0.07 | 0.76 |
| rs4961271  | 8  | 140596890 | AGO2       | 27  | 16  | 270 | 197 | 437 | 508 | 0.06 | 0.54 |
| rs7001653  | 8  | 140610939 | AGO2       | 132 | 158 | 384 | 377 | 219 | 186 | 0.11 | 0.20 |
| rs12098418 | 10 | 99357932  | CNNM1      | 14  | 8   | 156 | 148 | 565 | 565 | 0.40 | 0.62 |
| rs11190074 | 10 | 99361961  | CNNM1      | 5   | 5   | 121 | 99  | 609 | 617 | 0.70 | 0.64 |
| rs17568778 | 10 | 99368605  | CNNM1      | 4   | 7   | 67  | 119 | 664 | 594 | 0.11 | 0.70 |
| rs306664   | 12 | 27545818  | PPFIBP1    | 142 | 103 | 381 | 337 | 212 | 281 | 0.21 | 0.90 |
| rs753891   | 12 | 27548131  | PPFIBP1    | 5   | 5   | 110 | 123 | 620 | 593 | 0.96 | 0.61 |
| rs899069   | 12 | 27550546  | PPFIBP1    | 84  | 50  | 343 | 297 | 308 | 374 | 0.43 | 0.39 |
| rs7963570  | 12 | 27553796  | PPFIBP1    | 63  | 84  | 320 | 326 | 352 | 311 | 0.42 | 0.92 |
| rs7966993  | 12 | 27554420  | PPFIBP1    | 33  | 45  | 240 | 246 | 462 | 430 | 0.80 | 0.22 |
| rs256662   | 12 | 30804286  | AC010198.2 | 35  | 34  | 237 | 255 | 461 | 432 | 0.52 | 0.64 |
| rs7301387  | 12 | 30807504  | AC010198.2 | 31  | 35  | 221 | 243 | 483 | 443 | 0.37 | 0.82 |
| rs256679   | 12 | 30809469  | AC010198.2 | 146 | 167 | 346 | 367 | 242 | 187 | 0.27 | 0.61 |
| rs12873430 | 13 | 26971307  | AL160035.1 | 8   | 9   | 122 | 128 | 605 | 584 | 0.51 | 0.51 |
| rs12875586 | 13 | 26971748  | AL160035.1 | 1   | 4   | 73  | 75  | 661 | 642 | 0.49 | 0.27 |
| rs9581791  | 13 | 26973204  | RPS21P8    | 81  | 58  | 312 | 272 | 342 | 391 | 0.44 | 0.27 |
| rs2421035  | 13 | 26978564  | RPS21P8    | 8   | 9   | 111 | 102 | 616 | 610 | 0.24 | 0.05 |
| rs9512476  | 13 | 26979157  | RPS21P8    | 86  | 122 | 333 | 354 | 315 | 244 | 0.89 | 0.74 |

|            |    |          |        |     |     |     |     |     |     |      |      |
|------------|----|----------|--------|-----|-----|-----|-----|-----|-----|------|------|
| rs2824253  | 21 | 17171821 | -      | 125 | 133 | 367 | 338 | 243 | 250 | 0.50 | 0.32 |
| rs13047117 | 21 | 17177871 | -      | 72  | 55  | 322 | 274 | 341 | 392 | 0.75 | 0.46 |
| rs1501811  | 21 | 17201098 | -      | 155 | 106 | 338 | 326 | 242 | 289 | 0.07 | 0.37 |
| rs1604416  | 21 | 17206922 | NEK4P1 | 185 | 133 | 351 | 344 | 194 | 223 | 0.30 | 0.99 |

**Table S4. Haplotype marker characteristics.** Homozygous minor allele counts for the case and control populations are defined under columns E and F; heterozygous allele count are listed under columns G and H; homozygous major allele counts are listed under columns I and J; hardy-weinberg p values for the case and control populations are defined under columns K and L.
